# Supplementary material for: Flow chemistry kinetic studies reveal reaction conditions for ready access to unsymmetrical trehalose analogues
Source: Royal Society of Chemistry journal article supplement (doi:10.1039/c0ob00226g), 2010-01-01
Supplement: c0ob00226g.pdf [file c0ob00226g.pdf]

# Flow chemistry kinetic studies reveal reaction conditions for ready access to unsymmetrical trehalose analogues

Mitul K. Patel and Benjamin G. Davis\*

*Department of Chemistry, Chemistry Research Laboratory,  
University of Oxford, Mansfield Road, Oxford, OX1 3TA, UK*

ben.davis@chem.ox.ac.uk

## Supplementary Information

### Contents

|                                        |     |
|----------------------------------------|-----|
| 1. General considerations              | S2  |
| 2. Synthetic protocols                 | S3  |
| 3. Flow chemistry and kinetic analysis | S7  |
| 4. Compound characterization data      | S14 |
| 5. NMR spectra                         | S22 |
| 6. References                          | S53 |

## 1. General considerations

Proton nuclear magnetic resonance spectra ( $^1\text{H}$  NMR) were recorded on a Bruker Bruker AVC500 (500MHz) spectrometer. Carbon nuclear magnetic resonance spectra ( $^{13}\text{C}$  NMR) were recorded on a Bruker AVC500 (125.6 MHz) and are proton decoupled. Spectra were assigned using COSY, DEPT-135, HMQC, HSQC, and HMBC if required. Phosphorus nuclear magnetic resonance spectra ( $^{31}\text{P}$  NMR) were recorded on a Bruker AV400 (162 MHz). All chemical shifts are quoted on the  $\delta$  scale in ppm using residual solvent as an internal standard.

Low resolution mass spectra were recorded on a Micromass Platform 1 spectrometer using electrospray ionization (ES), or on a Bruker Daltronic MicroTOF spectrometer. High resolution mass spectra were recorded on a Bruker Daltronic MicroTOF spectrometer.  $m/z$  values are reported in Daltons. Infrared spectra (FT-IR) were recorded on a Bruker Tensor 27 Fourier Transform spectrophotometer using either KBr discs for solids or as a thin film on NaCl plates. Absorption maxima are reported in wavenumbers ( $\text{cm}^{-1}$ ). Only signals representing functional groups are reported; C-H absorptions and the fingerprint region are not listed. Optical rotations were measured on a Perkin-Elmer 241 polarimeter at 589nm (Na D-line) with a path length of 1.0 dm and are reported in units of  $\text{deg dm}^{-1} \text{cm}^3 \text{g}^{-1}$ . Concentrations are given in g/100 mL.

Thin Layer Chromatography (TLC) was carried out using Merck aluminium backed sheets coated with Kieselgel 60F<sub>254</sub> silica gel. Visualization of the sheets was achieved using a UV lamp ( $\lambda_{\text{max}} = 254$  or 365 nm) and/or ammonium molybdate (5% in 2M  $\text{H}_2\text{SO}_4$ ), or sulfuric acid (0.2M in 1 MeOH : 1  $\text{H}_2\text{O}$ ). Silica gel chromatography was performed on a Biotage SP4 purification system using KP-Sil SNAP cartridges.

Anhydrous THF, DCM, and diethyl ether were dried under pressure through a column of alumina. Other anhydrous solvents were purchased from Fluka, and stored under

Argon over molecular sieves. All other solvents were used as supplied (analytical or HPLC grade). "Petrol" refers to the fraction of light petroleum ether boiling in the range 40-60°C. "Brine" refers to a saturated aqueous solution of sodium chloride.

Anhydrous D-trehalose was purchased from Fisher Scientific.

## 2. Synthetic protocols

### 2.1 Trehalose monofunctionalizations

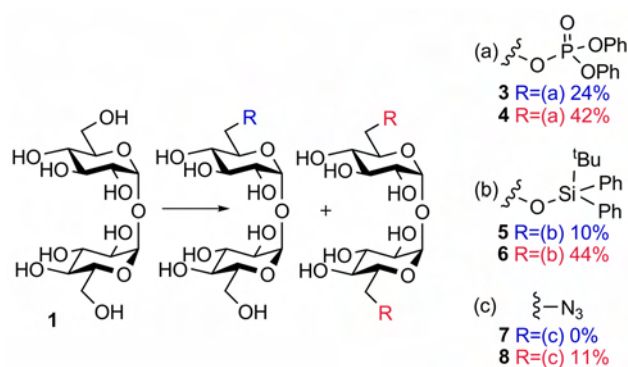

#### Phosphorylation

To a suspension of D-trehalose (7.50 g, 21.9 mmol, 1 eq) in anhydrous pyridine (100 mL) was added dropwise diphenylchlorophosphate (4.54 mL, 21.9 mmol, 1 eq). TLC (1 water : 4 isopropanol : 4 ethyl acetate) after 18 hours showed the presence of two products. The reaction was quenched with methanol (10 mL) and the reaction mixture concentrated *in vacuo*. The residue was co-evaporated with toluene to remove pyridine (x3). Silica gel chromatography (1 water : 3 isopropanol : 13 ethyl acetate) allowed separation of the two products. Lyophilization yielded **3** (3.02g, 24%) and **4** (7.41g, 42%) as a white amorphous solids.

### ***Silylation***

To a stirred suspension of D-trehalose (0.5g, 1.46mmol, 1eq) and imidazole (0.099g, 1.46mmol, 1eq) in dry DMF (10ml) was added *tert*-butyl diphenylchlorosilane (0.38ml, 1.46mmol, 1eq) at room temperature. After stirring for 26 hours, TLC (1 water : 2 isopropanol : 2 ethyl acetate) indicated the formation of two products. The reaction mixture was concentrated *in vacuo* and purified by silica gel chromatography (2 ethyl acetate : 1 isopropanol) to give **5** (85mg, 10%) and **6** (0.53g, 44%) as white amorphous solids after lyophilization.

### ***Mitsunobu reaction***

#### *Synthesis of hydrazoic acid*

Hydrazoic acid was prepared by the careful addition of concentrated sulphuric acid (0.41ml, 7.7mmol, 0.5eq) to a solution of NaN<sub>3</sub> (1.0g, 15.4mmol, 1eq) in toluene (12ml) and water (1.5ml) at 0 °C. The toluene layer containing the hydrazoic acid was decanted off via cannula and stored over Na<sub>2</sub>SO<sub>4</sub>. Titration against a standardized solution of NaOH with phenolphthalein as indicator was used to determine the concentration of HN<sub>3</sub> as 0.75M.

#### *Mitsunobu reaction*

Diisopropyl azodicarboxylate (DIAD, 0.057ml, 0.292mmol, 1eq) was added to a stirred solution of D-trehalose (0.10g, 0.292mmol, 1eq) and PPh<sub>3</sub> (0.077g, 0.292mmol, 1eq) in dry 1,4-dioxane (10ml) to form a pale orange solution. After stirring for 30 minutes at room temperature, the solution decolourized and hydrazoic acid (0.750M solution in toluene, 0.39ml, 0.292mmol, 1eq) was added dropwise. TLC (1 water : 2 isopropanol : 2 ethyl acetate) after 66 hours indicated the formation of a product. The reaction was quenched with 2M NaOH (1ml) and the solvent removed *in vacuo*. Silica gel chromatography (1 water : 4 isopropanol : 8 ethyl acetate) followed

by lyophilization allowed isolation of the product as a white amorphous solid (13.3mg, 11%).

## 2.2 Synthesis of trehalose-6-phosphate

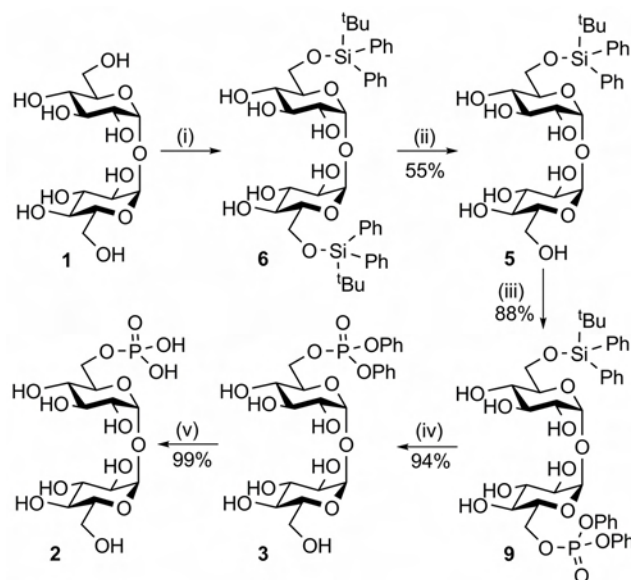

### Step (i) and (ii)

To a suspension of D-trehalose (1.0g, 2.92mmol, 1eq) in anhydrous pyridine (50ml) was added *tert*-butyl diphenyl chlorosilane (1.52ml, 5.84mmol, 2eq). TLC (1 water : 4 isopropanol : 10 ethyl acetate) after 14 hours indicated complete consumption of the starting materials. The solvent was removed *in vacuo* and the residue co-evaporated with toluene to remove pyridine (x3). To the crude solid, stirred at 0 °C in methanol (5ml) and diethyl ether (15ml), was added acetyl chloride (0.40ml, 5.84mmol, 2eq). The reaction mixture was warmed to room temperature, and regularly monitored by TLC and mass spectrometry. After 18 hours, a significant amount of the D-trehalose by-product was seen (~10%) and the reaction quenched with saturated NaHCO<sub>3</sub> solution until the mixture was at pH 7 (pH paper), and the solvent removed *in vacuo*. Two separate silica gel columns were required to purify the desired compound (1 water : 4 isopropanol : 10 ethyl acetate followed by 2 isopropanol : 1 ethyl acetate). Lyophilization gave the title compound as a white amorphous solid (0.93g, 55%).

**Step (iii)**

To a solution of **5** (0.90g, 1.55mmol, 1eq) in anhydrous pyridine (30ml) was added diphenyl chlorophosphate (0.36ml, 1.70mmol, 1.1eq). The reaction mixture was stirred at room temperature for 15 hours, after which TLC (1 water : 4 isopropanol : 10 ethyl acetate) indicated complete consumption of starting material. The reaction was quenched with methanol (2ml), the solvent removed *in vacuo*, and the crude solid co-evaporated with toluene to remove pyridine (x3). Silica gel chromatography (9 ethyl acetate : 1 methanol) followed by lyophilization gave the desired compound as a white solid (1.11g, 88%).

**Step (iv)**

To a solution of **9** (1.10g, 1.35mmol, 1eq) in methanol (20ml) at room temperature, was added acetyl chloride (0.39ml, 5.41mmol, 4eq). The reaction was stirred at this temperature for 18 hours, after which TLC (1 water : 4 isopropanol : 4 ethyl acetate) indicated completion of the reaction. The reaction mixture was quenched with saturated NaHCO<sub>3</sub> solution to pH 7, and the solvent removed *in vacuo*. Silica gel chromatography (1 water : 4 isopropanol : 6 ethyl acetate) followed by lyophilization afforded the desired compound as a white amorphous solid (0.73g, 94%).

**Step (v)**

A suspension of **3** (0.75g, 1.31mmol, 1eq) and PtO<sub>2</sub> (15 mg, 0.066mmol, 0.05eq) in 75% aqueous ethanol (10 mL) with 0.5% glacial acetic acid (50 μL) was repeatedly degassed under high vacuum and the reaction vessel charged with hydrogen. The reaction was maintained at room temperature with aggressive stirring under an atmospheric pressure of hydrogen for 14 hours after which TLC (5 ethanol : 3 NH<sub>4</sub>OH : 1 water) showed the complete consumption of the starting material and the formation of a single product. The reaction mixture was filtered through Celite<sup>®</sup> and

the solvent was removed *in vacuo*. Lyophilization afforded the title compound as a white amorphous solid (0.55g, 99%).

### 3. Flow chemistry and kinetic analysis

#### 3.1 General considerations

Reactions were performed using a Syrris Africa flow chemistry system using a 1000µl or 250µl microreactor chip. The flow system was dried by rinsing reagent flasks and microreactor chip with anhydrous DCM (x3). The reagent flasks were subsequently dried over a stream of nitrogen. The flow path was primed with nitrogen, prior to addition of any solvents, or reagents.

High Performance Liquid Chromatography (HPLC) was conducted on a Dionex UltiMate 3000 HPLC system at ambient temperature, with a Varian PLS400 Evaporative Light Scattering detector (ELSD) for eluant detection. Injections were performed by manual injection using a 20µl Rheodyne sample loop as per the manufacturer's instructions.

Quantification of eluants required determination of ELSD response curves as reported previously.<sup>1</sup> 5µl of standardised concentrations of eluants (between 0 – 2.0mg/ml) were injected and the response of the detector measured and fitted to  $\text{Area} = a m^b$ . Values of a and b for the different compounds, chromatographic conditions and ELSD settings are reported below.

Kinetic parameters were estimated by minimisation of the objective function:

$$Q = \sum_i \sum_t (x_{i,t,exp} - x_{i,t,theo})^2$$

where  $x_{i,t,exp}$  and  $x_{i,t,theo}$  are experimental and theoretical concentrations respectively of the different reaction components,  $i$ , at different time points  $t$ . Theoretical values were determined by computationally solving equations (1)-(4) with Matlab 2009 using a Runge-Kutta algorithm.

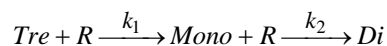

$$d[Tre]/dt = -k_1[Tre][R] \quad (1)$$

$$d[Mono]/dt = k_1[Tre][R] - k_2[Mono][R] \quad (2)$$

$$d[Di]/dt = k_2[Mono][R] \quad (3)$$

$$d[R]/dt = -k_1[Tre][R] - k_2[Mono][R] \quad (4)$$

### 3.2 Trehalose phosphorylation

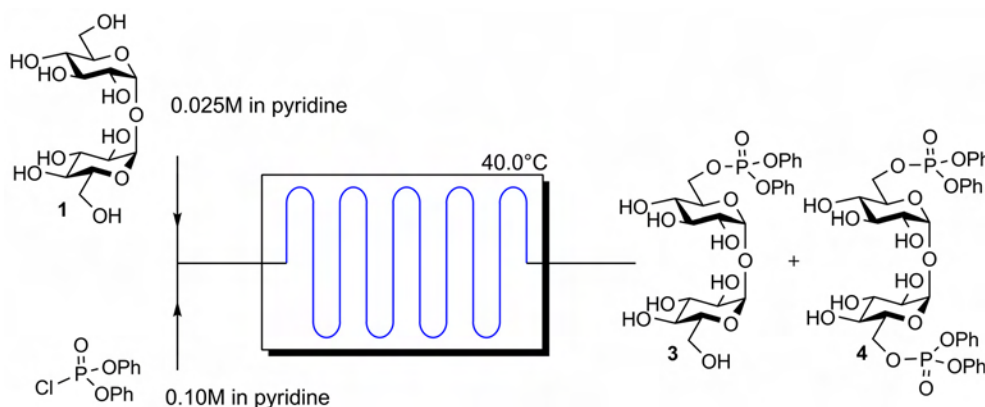

Reactions were performed using a 1000 $\mu$ l microreactor chip at 40.0 °C. Solutions of D-trehalose (0.025M in pyridine) and diphenylchlorophosphate (0.1M in pyridine) were pumped to the chip at identical flow rates. Reactions were performed with a residence time between 1-10 minutes (1 minute reactions were performed on a 250 $\mu$ l chip). 250 $\mu$ l of the reaction mixture was collected in a vial containing methanol (1ml). The solvents were removed *in vacuo* and the crude residue dissolved in pyridine (0.5ml). Acetic anhydride (0.5ml) was added and the reaction mixture stirred at room temperature for 8 hours. The reactions were quenched with methanol (1ml) and the solvents removed *in vacuo*. The crude products were dissolved in methanol (5ml) and the product distribution analysed by HPLC using 5 $\mu$ l injections into a Phenomenex Synergi Hydro C18 column (250 x 4.8mm, 4 $\mu$ m) with 40 water : 60 acetonitrile as the mobile phase at a flow rate of 1.0 ml/min. Eluants were detected using an in-line ELS detector (gain 5.0, nebulizer 30 °C, drift tube 80 °C, 1.65 Bar N<sub>2</sub>).



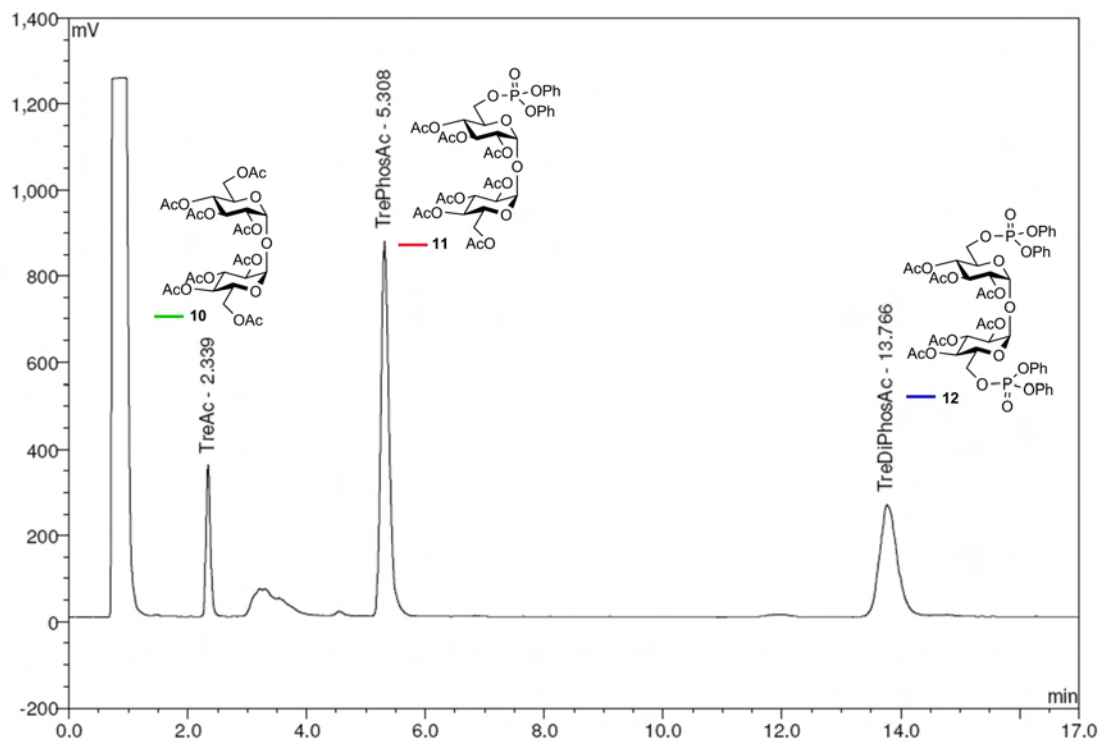

|           | <b>a</b> | <b>b</b> |
|-----------|----------|----------|
| <b>10</b> | 261.5    | 1.435    |
| <b>11</b> | 255.8    | 1.421    |
| <b>12</b> | 120.7    | 1.309    |

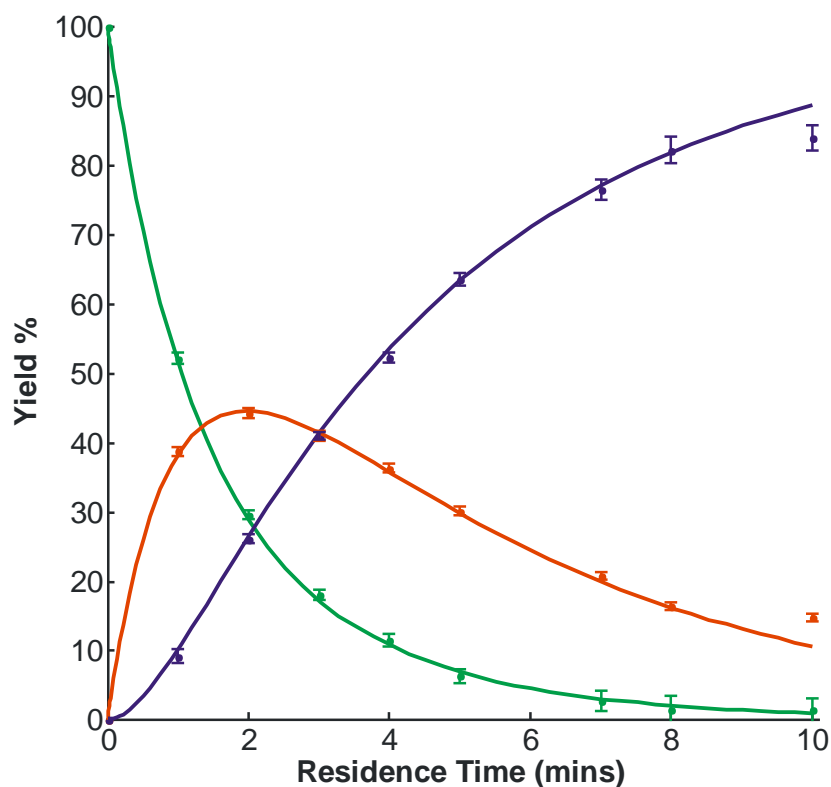

$$k_1 = 0.157 \text{ mol}^{-1}\text{dm}^3\text{s}^{-1}, k_2 = 0.133 \text{ mol}^{-1}\text{dm}^3\text{s}^{-1}, r^2 = 0.986.$$

### ***Large Scale Reaction***

A 0.025M solution of anhydrous D-trehalose in pyridine was reacted with a 0.10M solution of diphenylchlorophosphate in pyridine at 40.0 °C through a 1000 $\mu$ l microreactor with a residence time of 120 seconds. The effluent from the chip was quenched by addition into water (500ml). 468ml of reaction mixture (equating to 2.0g of trehalose, 5.85mmol) was collected. The solvents were removed *in vacuo* and co-evaporated with toluene to remove pyridine (x3). The desired product was purified by silica gel chromatography (1 water : 4 isopropanol : 6 ethyl acetate + 1% NH<sub>4</sub>OH for 4 column volumes, then a gradient to 1 water : 4 isopropanol : 6 ethyl acetate over 6 column volumes) to give **3** as a white amorphous solid (1.31g, 39%).

### 3.3 Desilylation reactions

#### 6,6'-*O*-diterbutyldiphenylsilyl-D-trehalose (**6**)

To a stirred suspension of D-trehalose (3.00g, 8.77mmol, 1eq) in dry pyridine (60ml) was added *tert*-butyl diphenylchlorosilane (4.79ml, 18.4mmol, 2.1eq) at room temperature. After stirring for 12 hours, TLC (1 water : 2 isopropanol : 2 ethyl acetate) indicated the complete consumption of starting. The reaction mixture was concentrated *in vacuo* and co-evaporated with toluene to remove pyridine(x3). The product was purified by silica gel chromatography (9 THF : 1 methanol) to give the desired compound as a white amorphous solid after lyophilization (6.82g, 95%).

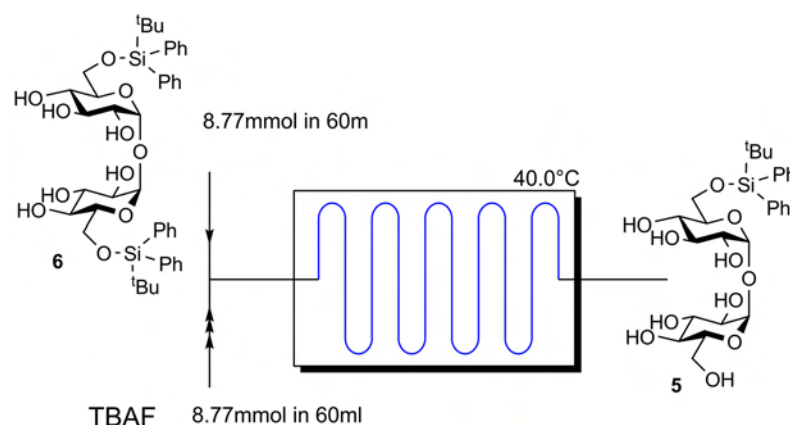

Reactions were performed using a Syrris Africa flow chemistry system using a 1000 $\mu$ l microreactor chip at 25.0°C. TBAF (8.77mmol in 60ml of solvent) was pumped through the chip at a flow rate three times that of **6** (8.77mmol in 60ml of solvent). Reactions were performed with a residence time between 0-70 minutes. 250 $\mu$ l of the reaction mixture was collected and diluted with pyridine (1ml). To this mixture was added acetic anhydride (1ml) and the reaction mixtures maintained at room temperature for 10 hours. The reactions were quenched with methanol (1ml) and the solvents removed *in vacuo*. The crude products were dissolved in methanol (5ml) and the product distribution analysed by HPLC using 5 $\mu$ l injections into a Phenomenex Jupiter Proteo C12 column (300 x 4.8mm, 5 $\mu$ m) with acetonitrile as the

mobile phase at a flow rate of 1.0 ml/min. Eluants were detected using an in-line ELS detector (gain 2.0, nebulizer 30°C, drift tube 80°C, 1.65 Bar N<sub>2</sub>)

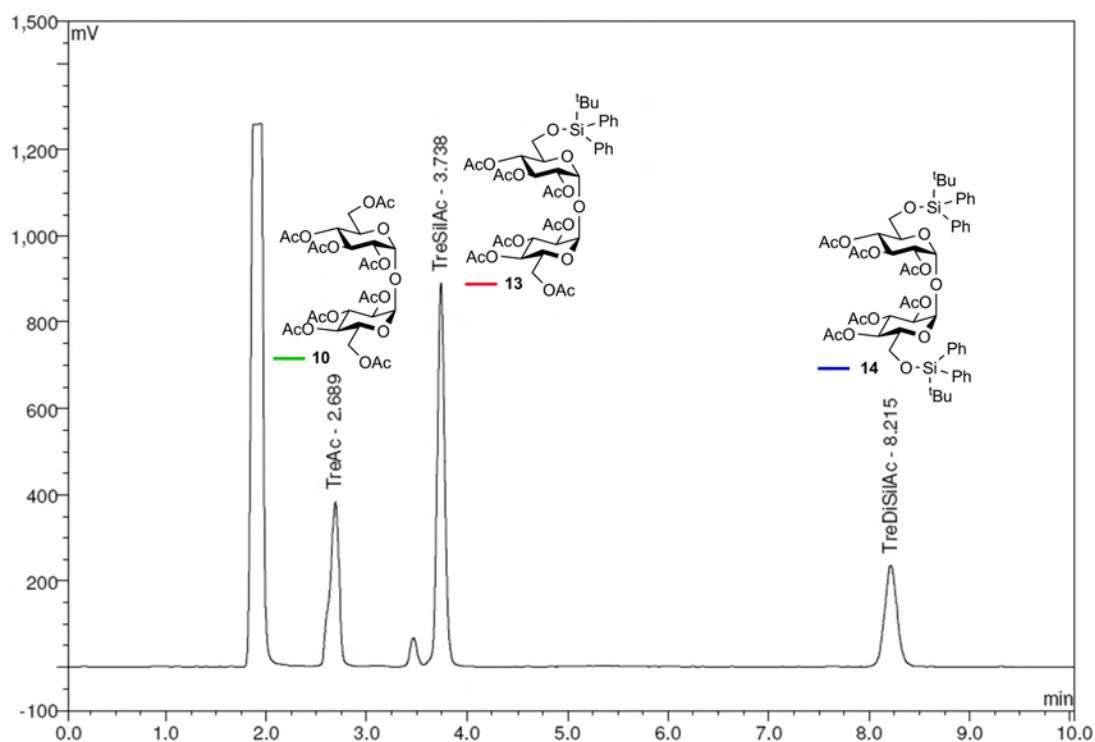

|           | <b>a</b> | <b>b</b> |
|-----------|----------|----------|
| <b>10</b> | 175.3    | 1.361    |
| <b>13</b> | 175.5    | 1.360    |
| <b>14</b> | 112.7    | 1.288    |

### High solubility system

**6** was dissolved in pyridine and TBAF dissolved in methanol. The reaction was performed as described above and kinetic parameters estimated by minimization of  $Q$ .

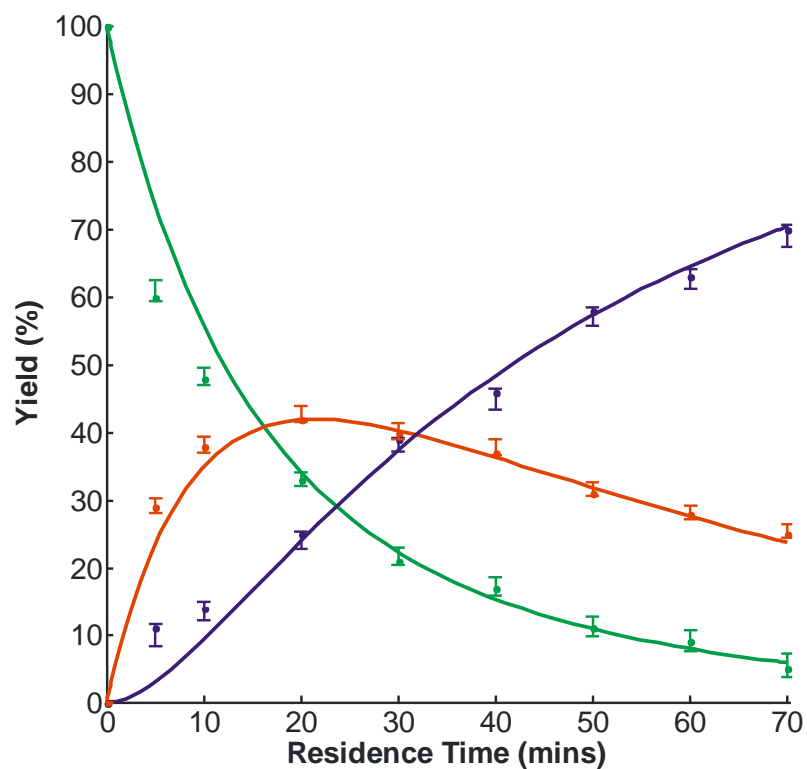

$$k_1 = 21.9 \times 10^{-3} \text{ mol}^{-1}\text{dm}^3\text{s}^{-1}; k_2 = 17.9 \times 10^{-3} \text{ mol}^{-1}\text{dm}^3\text{s}^{-1}; r^2 = 0.9651$$

### Low solubility system

**6** was dissolved in THF and TBAF dissolved in petrol with 1% methanol. The reaction was performed as described above and kinetic parameters estimated by minimization of  $Q$ .

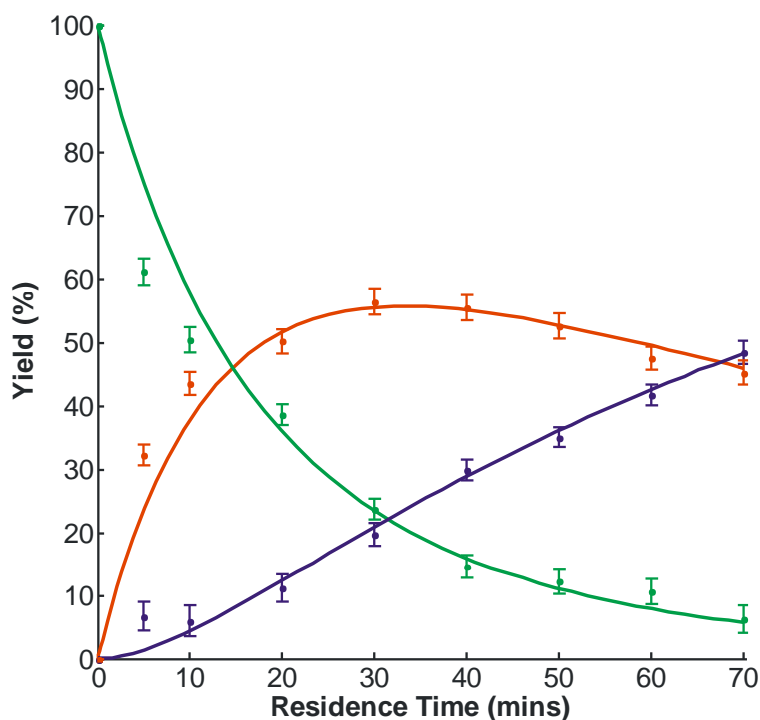

$$k_1 = 21.6 \times 10^{-3} \text{ mol}^{-1}\text{dm}^3\text{s}^{-1}; k_2 = 7.67 \times 10^{-3} \text{ mol}^{-1}\text{dm}^3\text{s}^{-1}; r^2 = 0.9691$$

#### 4. Compound characterization data

##### Trehalose-6-phosphate (2)

$R_f$  0.2 (5 ethanol : 3  $\text{NH}_4\text{OH}$  : 1 water),  $[\alpha]_D^{18} + 150.3$  ( $c = 1.0$ ,  $\text{H}_2\text{O}$ ) lit.<sup>2</sup>  $[\alpha]_D^{21} + 151.2$  ( $c = 0.8$ ,  $\text{H}_2\text{O}$ );  $^1\text{H}$  NMR (500MHz,  $\text{D}_2\text{O}$ )  $\delta$  ppm 3.36 (1H, t,  $J_{\text{H}3'-\text{H}4'}$  9.5Hz,  $J_{\text{H}4'-\text{H}5'}$  9.5Hz,  $\text{H}4'$ ), 3.50 (1H, t,  $J_{\text{H}3-\text{H}4}$  9.6Hz,  $J_{\text{H}4-\text{H}5}$  9.6Hz,  $\text{H}4$ ), 3.56 (1H, dd,  $J_{\text{H}2-\text{H}3}$  10.1Hz,  $J_{\text{H}1-\text{H}2}$  3.8Hz,  $\text{H}2$ ), 3.59 (1H, dd,  $J_{\text{H}2'-\text{H}3'}$  9.8Hz,  $J_{\text{H}1'-\text{H}2'}$  3.8Hz,  $\text{H}2'$ ), 3.67 (1H, dd,  $J_{\text{H}6\text{a}-\text{H}6\text{b}}$  11.8Hz,  $J_{\text{H}5'-\text{H}6\text{b}}$  5.4Hz,  $\text{H}6\text{b}$ ), 3.71-3.79 (4H, m,  $\text{H}3$ ,  $\text{H}3'$ ,  $\text{H}5'$ ,  $\text{H}6\text{a}$ ), 3.82 (1H, d,  $J_{\text{H}4-\text{H}5}$  10.1Hz,  $\text{H}5$ ), 3.86 (ddd,  $J_{\text{H}6\text{a}-\text{H}6\text{b}}$  12.1Hz,  $J_{\text{H}6\text{b}-3\text{P}}$  5.4Hz,  $J_{\text{H}5-\text{H}6\text{b}}$  1.7Hz,  $\text{H}6\text{b}$ ), 3.94 (1H, ddd,  $J_{\text{H}6\text{a}-\text{H}6\text{b}}$  11.9Hz,  $J_{\text{H}6\text{a}-3\text{P}}$  7.7Hz,  $J_{\text{H}5-\text{H}6\text{a}}$  4.1Hz,  $\text{H}6\text{a}$ ), 5.09 (1H, d,  $J_{\text{H}1'-\text{H}2'}$  4.1Hz,  $\text{H}1'$ ), 5.12 (1H, d,  $J_{\text{H}1-\text{H}2}$  3.8Hz,  $\text{H}1$ );  $^{13}\text{C}$  NMR (126MHz,  $\text{D}_2\text{O}$ )  $\delta$  ppm 60.5 (1C,  $\text{C}6'$ ), 63.0 (1C, d,  $J_{\text{C}6-3\text{P}}$  4.8Hz,  $\text{C}6$ ), 69.1 ( $\text{C}1$ ,  $\text{C}4'$ ), 69.7 (1C,  $\text{C}4$ ), 70.9 (1C,  $\text{C}2$ ), 71.1 (1C,  $\text{C}2'$ ), 71.6 (1C, d,  $J_{\text{C}5-3\text{P}}$  6.7Hz,  $\text{C}5$ ), 72.1 (1C,  $\text{C}5'$ ), 72.2 (1C,  $\text{C}3$ ), 72.4 (1C,  $\text{C}3'$ ), 93.3 (1C,  $\text{C}1$ ), 93.4 (1C,  $\text{C}1'$ );  $^{31}\text{P}\{^1\text{H}\}$  NMR (162MHz,  $\text{D}_2\text{O}$ )  $\delta$  ppm 3.6 (1P,  $\text{ROP}(\text{O})(\text{OH})_2$ );  $m/z$  ( $\text{ES}^-$ ) 421.5 [ $\text{M} - \text{H}$ ].

### 6-*O*-(diphenoxyphosphoryl)-D-trehalose (3)

R<sub>f</sub> 0.68 (1 water : 4 isopropanol : 4 ethyl acetate), [α]<sub>D</sub><sup>22</sup> +63.9 (c = 1.0, MeOH); <sup>1</sup>H NMR (500MHz, MeOD) δ ppm 3.34 (1H, t, *J*<sub>H3'-H4'</sub> 9.1Hz, *J*<sub>H4'-H5'</sub> 9.1Hz, H4'), 3.38 (1H, t, *J*<sub>H3-H4</sub> 9.1Hz, *J*<sub>H4-H5</sub> 9.1Hz, H4), 3.43 (1H, dd, *J*<sub>H2'-H3'</sub> 9.8Hz, *J*<sub>H1'-H2'</sub> 3.5Hz, H2'), 3.48 (1H, dd, *J*<sub>H2-H3</sub> 9.8Hz, *J*<sub>H1-H2</sub> 3.8Hz, H2), 3.70 (1H, dd, *J*<sub>H6'a-H6'b</sub> 12.0Hz, *J*<sub>H5'-H6'b</sub> 5.4Hz, H6'b), 3.80 (1H, t, *J*<sub>H2'-H3'</sub> 9.5Hz, *J*<sub>H3'-H4'</sub> 9.5Hz, H3'), 3.81 (1H, t, *J*<sub>H2-H3</sub> 9.1Hz, *J*<sub>H3-H4</sub> 9.1Hz, H3), 3.80-3.83 (1H, m, H6'a), 3.84 (1H, m, *J*<sub>H5'-H6'b</sub> 4.1Hz, *J*<sub>H5'-H6'a</sub> 2.2Hz, H5'), 4.09 (1H, dt, *J*<sub>H4-H5</sub> 10.1Hz, *J*<sub>H5-H6a</sub> 2.1Hz, *J*<sub>H5-H6b</sub> 2.1Hz, H5), 4.48 (1H, ddd, *J*<sub>H6a-H6b</sub> 11.5Hz, *J*<sub>H6b-31P</sub> 7.1Hz, *J*<sub>H5-H6b</sub> 3.5Hz, H6b), 4.55 (1H, ddd, *J*<sub>H6a-H6b</sub> 11.5Hz, *J*<sub>H6a-31P</sub> 6.8Hz, *J*<sub>H5-H6a</sub> 1.9Hz, H6a), 5.09 (1H, d, *J*<sub>H1'-H2'</sub> 3.8Hz, H1'), 5.10 (1H, d, *J*<sub>H1-H2</sub> 3.8Hz, H1), 7.21-7.31 (3H, m, ArH<sub>ortho</sub>, ArH<sub>para</sub>), 7.40-7.43 (2H, m, ArH<sub>meta</sub>); <sup>13</sup>C NMR (126MHz, MeOD) δ ppm 62.6 (1C, C6'), 69.8 (1C, d, *J*<sub>C6-31P</sub> 6.7Hz, C6), 71.2 (1C, C4'), 71.9 (1C, C4), 72.0 (1C, d, *J*<sub>C5-31P</sub> 6.7Hz, C5), 73.0 (1C, C5'), 73.2 (1C, C2'), 73.9 (1C, C2), 74.4 (1C, C3'), 74.6 (1C, C3), 95.2 (1C, C1'), 95.3 (1C, C1), 121.4 (2C, d, *J*<sub>C-31P</sub> 4.8Hz, ArC<sub>ortho</sub>), 126.8 (1C, ArC<sub>para</sub>), 131.1 (2C, ArC<sub>meta</sub>), 151.9 (1C, d, *J*<sub>C-31P</sub> 7.6Hz, ArC<sub>ipso</sub>), 151.9 (1C, d, *J*<sub>C-31P</sub> 7.6Hz, ArC<sub>ipso</sub>); <sup>31</sup>P{<sup>1</sup>H} NMR (162MHz, MeOD) δ ppm -12.0 (1P, P(O)(OPh)<sub>2</sub>); FT-IR (KBr disc) ν 1287 (P=O), 3271 br (OH); HRMS m/z (ES<sup>+</sup>) 596.1357 [M + Na]<sup>+</sup> required (596.1344); elemental C (49.87%) H (5.19%), required C (50.18%) H (5.44%).

### 6,6'-*O*-di(diphenoxyphosphoryl)-D-trehalose (4)

R<sub>f</sub> 0.71 (1 water : 4 isopropanol : 4 ethyl acetate), [α]<sub>D</sub><sup>22</sup> +63.8 (c = 1.0, MeOH); <sup>1</sup>H NMR (500MHz, MeOD) δ ppm 3.37 (2H, t, *J*<sub>H3-H4</sub> 9.1Hz, *J*<sub>H4-H5</sub> 9.1Hz, H4), 3.40 (2H, dd, *J*<sub>H2-H3</sub> 9.9Hz, *J*<sub>H1-H2</sub> 3.6Hz, H2), 3.79 (2H, t, *J*<sub>H2-H3</sub> 9.3Hz, *J*<sub>H3-H4</sub> 9.3Hz, H3), 4.07 (2H, ddd, *J*<sub>H4-H5</sub> 9.9Hz, *J*<sub>H5-H6b</sub> 4.7Hz, *J*<sub>H5-H6a</sub> 2.0Hz, H5), 4.48 (2H, ddd, *J*<sub>H6a-H6b</sub>

11.1Hz,  $J_{\text{H6b-31P}}$  7.6Hz,  $J_{\text{H5-H6b}}$  4.7Hz, H6b), 4.55 (2H, ddd,  $J_{\text{H6-H6'}}$  11.1Hz,  $J_{\text{H6a-31P}}$  6.6Hz,  $J_{\text{H5-H6a}}$  1.9Hz, H6a), 5.00 (2H, d,  $J_{\text{H1-H2}}$  3.8Hz, H1), 7.21-7.29 (6H, m, ArH<sub>ortho</sub>, ArH<sub>para</sub>), 7.37-7.43 (4H, m, ArH<sub>meta</sub>);  $^{13}\text{C}$  NMR (126MHz, MeOD)  $\delta$  ppm 69.8 (2C, d,  $J_{\text{C6-31P}}$  6.7Hz, C6), 51.3 (2C, C4), 72.1 (2C, d,  $J_{\text{C5-31P}}$  6.7Hz, C5), 73.0 (2C, C2), 74.5 (2C, C3), 95.3 (2C, C1), 121.2 (8C, d,  $J_{\text{C-31P}}$  4.8Hz, ArC<sub>ortho</sub>), 126.9 (4C, ArC<sub>para</sub>), 131.1 (8C, d,  $J_{\text{C-31P}}$  2.9Hz, ArC<sub>meta</sub>), 151.9 (2C, d,  $J_{\text{C-31P}}$  1.9Hz, ArC<sub>ipso</sub>), 151.9 (2C, d,  $J_{\text{C-31P}}$  2.9Hz, ArC<sub>ipso</sub>);  $^{31}\text{P}\{^1\text{H}\}$  NMR (162MHz, MeOD)  $\delta$  ppm -11.9 (1P, P(O)(OPh)<sub>2</sub>); FT-IR (KBr disc)  $\nu$  1271 (P=O), 3364 br (OH); HRMS  $m/z$  (ES<sup>+</sup>) 829.1629 [M + Na]<sup>+</sup> required (829.1633).

### 6-O-terbutyldiphenylsilyl-D-trehalose (5)

$R_f$  0.29 (1 water : 4 isopropanol : 4 ethyl acetate),  $[\alpha]_D^{18}$  +20.3 (c = 1.0, dioxane);  $^1\text{H}$  NMR (500 MHz, DMSO- $d_6$ )  $\delta$  ppm 1.00 (9H, s, <sup>t</sup>Bu), 3.15 (1H, td,  $J_{\text{H3'-H4'}}$  9.3Hz,  $J_{\text{H4'-H5'}}$  9.3Hz,  $J_{\text{H4'-OH}}$  5.7Hz, H4'), 3.25 (1H, td,  $J_{\text{H3-H4}}$  9.5Hz,  $J_{\text{H4-H5}}$  9.5Hz,  $J_{\text{H4-OH}}$  5.0Hz, H4), 3.26 (1H, m, H2'), 3.29 (1H, dt,  $J_{\text{H2-H3}}$  10.7Hz,  $J_{\text{H1-H2}}$  4.4Hz,  $J_{\text{H2-OH}}$  4.4Hz, H2), 3.49 (1H, dt,  $J_{\text{H6'a-H6'b}}$  11.4Hz,  $J_{\text{H5'-H6'b}}$  5.5Hz,  $J_{\text{H6'b-OH}}$  5.5Hz, H6'b), 3.55-3.64 (3H, m, H3', H5', H6'a), 3.68 (1H, ddd,  $J_{\text{H3-H4}}$  9.9Hz,  $J_{\text{H3-OH}}$  4.7Hz,  $J_{\text{H2-H3}}$  1.9Hz, H3), 3.79 (1H, dd,  $J_{\text{H6a-H6b}}$  10.7Hz,  $J_{\text{H5-H6b}}$  5.4Hz, H6b), 3.83 (1H, dd,  $J_{\text{H6a-H6b}}$  10.7Hz,  $J_{\text{H5-H6a}}$  1.3Hz, H6a), 3.87 (1H, ddd,  $J_{\text{H4-H5}}$  9.9Hz,  $J_{\text{H5-H6b}}$  5.0Hz,  $J_{\text{H5-H6a}}$  1.3Hz, H5), 4.39 (1H, t,  $J_{\text{H6a-OH}}$  5.8Hz,  $J_{\text{H6b-OH}}$  5.8Hz, 6'-OH), 4.58 (1H, d,  $J_{\text{H2-OH}}$  6.3Hz, 2-OH), 4.66 (1H, d,  $J_{\text{H2'-OH}}$  6.3Hz, 2'-OH), 4.75 (1H, d,  $J_{\text{H3'-OH}}$  4.7Hz, 3'-OH), 4.78 (1H, d,  $J_{\text{H4'-OH}}$  5.4Hz, 4'-OH), 4.84 (1H, d,  $J_{\text{H3-OH}}$  5.0Hz, 3-OH), 4.86 (1H, d,  $J_{\text{H4-OH}}$  5.4Hz, 4-OH), 4.95 (1H, d,  $J_{\text{H1'-H2'}}$  3.5Hz, H1'), 4.97 (1H, d,  $J_{\text{H1-H2}}$  3.8Hz, H1), 7.40-7.46 (6H, m, ArH<sub>ortho</sub>, ArH<sub>para</sub>), 7.67 (4H, ad,  $J$  6.9Hz, ArH<sub>meta</sub>);  $^{13}\text{C}$  NMR (126 MHz, DMSO- $d_6$ )  $\delta$  ppm 19.0 (1C,  $\underline{\text{C}}(\text{CH}_3)_3$ ), 26.6 (1C,  $\text{C}(\underline{\text{C}}\text{H}_3)_3$ ), 60.7 (1C, C6'), 63.4 (1C, C6), 69.9 (1C, C4), 70.1 (1C, C4'), 71.6 (1C, C2), 71.7 (1C, C2'), 72.3 (1C, C5), 72.5



(1C, C3), 73.0 (1C, C5'), 73.0 (1C, C3'), 93.0 (1C, C1), 93.1 (1C, C1'), 127.8 (4C, ArC<sub>ortho</sub>), 129.6 (1C, ArC<sub>para</sub>), 129.7 (1C, ArC<sub>para</sub>), 133.3 (2C, ArC<sub>ipso</sub>), 133.5 (2C, ArC<sub>ipso</sub>), 135.1 (1C, ArC<sub>meta</sub>), 135.2 (1C, ArC<sub>meta</sub>); FT-IR (KBr disc)  $\nu$  3400 br (OH); m/z (ES<sup>+</sup>) 603.2221 [M + Na]<sup>+</sup> (required 603.2232); elemental C (58.00%) H (6.97%), required C (57.91%) H (6.94%).

### **6,6'-O-diterbutyldiphenylsilyl-D-trehalose (6)**

R<sub>f</sub> 0.35 (1 water : 2 isopropanol : 2 ethyl acetate),  $[\alpha]_D^{17} +71.5$  (c = 1.0, dioxane), <sup>1</sup>H NMR (500MHz, DMSO)  $\delta$  ppm 1.00 (18H, s, 2 x <sup>t</sup>Bu), 3.26 (2H, td,  $J_{H3-H4}$  9.5Hz,  $J_{H4-H5}$  9.5Hz,  $J_{H4-OH}$  5.4Hz, H4), 3.30 (2H, ddd,  $J_{H2-H3}$  9.8Hz,  $J_{H2-OH}$  6.3Hz,  $J_{H1-H2}$  3.8Hz, H2), 3.63 (2H, td,  $J_{H2-H3}$  9.1Hz,  $J_{H3-H4}$  9.1Hz,  $J_{H3-OH}$  5.0Hz, H3), 3.80 (2H, dd,  $J_{H6a-H6b}$  11.0Hz,  $J_{H5-H6b}$  5.7Hz, H6b), 3.86 (4H, m, H5, H6a), 4.62 (2H, d,  $J_{H2-OH}$  6.3Hz, 2-OH), 4.84 (2H, d,  $J_{H3-OH}$  4.7Hz, 3-OH), 4.91 (2H, d,  $J_{H2-OH}$  5.4Hz, 4-OH), 5.06 (1H, d,  $J_{H1-H2}$  3.5Hz, H1), 7.36-7.46 (12H, ArH<sub>ortho</sub>, ArH<sub>para</sub>), 7.70 (8H, m, ArH<sub>meta</sub>); <sup>13</sup>C NMR (126MHz, DMSO)  $\delta$  ppm 19.0 (2C, 2 x C(CH<sub>3</sub>)<sub>3</sub>), 26.6 (6C, 2 x C(CH<sub>3</sub>)<sub>3</sub>), 63.4 (2C, C6), 70.0 (2C, C4), 71.8 (2C, C2), 72.3 (2C, C5), 73.2 (2C, C3), 92.8 (2C, C1), 127.5 (4C, ArC<sub>ortho</sub>), 127.7 (4C, ArC<sub>ortho</sub>), 129.2 (2C, ArC<sub>para</sub>), 129.6 (2C, ArC<sub>para</sub>), 134.5 (4C, ArC<sub>ipso</sub>), 135.2 (4C, ArC<sub>ipso</sub>), 133.3 (2C, ArC<sub>meta</sub>), 133.5 (2C, ArC<sub>meta</sub>); FT-IR (KBr disc)  $\nu$  3350 br (OH); m/z (ES<sup>+</sup>) 841.3410 [M + Na<sup>+</sup>] (required 841.3410).

### **6,6'-diazido-D-trehalose (8)**

R<sub>f</sub> 0.69 (1 water : 2 isopropanol : 2 ethyl acetate),  $[\alpha]_D^{17} +154.8$  (c = 0.5, H<sub>2</sub>O), lit.<sup>3</sup>  $[\alpha]_D^{20} +156$  (c = 1.0, H<sub>2</sub>O); <sup>1</sup>H NMR (500MHz, D<sub>2</sub>O)  $\delta$  ppm 3.37 (2H, t,  $J_{H3-H4}$  9.1Hz,  $J_{H4-H5}$  9.1Hz, H4), 3.47 (2H, dd,  $J_{H6a-H6b}$  13.7Hz,  $J_{H5-H6b}$  5.8Hz, H6b), 3.58 (2H, as, H2), 3.58 (2H, dd,  $J_{H6a-H6b}$  10.4Hz,  $J_{H5-H6a}$  3.8Hz, H6a), 3.74 (2H, t,  $J_{H2-H3}$  9.5Hz,  $J_{H3-H4}$  9.5Hz, H3), 3.89 (2H, ddd,  $J_{H4-H5}$  10.0Hz,  $J_{H5-H6b}$  5.9Hz,  $J_{H5-H6a}$  2.4Hz, H5), 5.11 (2H, d,  $J_{H1-H2}$  3.8Hz, H1); <sup>13</sup>C NMR (126MHz, D<sub>2</sub>O)  $\delta$  ppm 50.8 (2C, C6), 70.4

(2C, C4), 70.9 (2C, C2), 71.1 (2C, C5), 72.3 (2C, C3), 93.8 (2C, C1); FT-IR (KBr disc)  $\nu$  2106 ( $\text{N}_3$ ), 3428 br (OH); HRMS  $m/z$  ( $\text{ES}^-$ ) 391.1218 [ $\text{M} - \text{H}$ ] $^-$  required (391.1219).

### **6-*O*-ditertbutyldiphenylsilyl-6'-*O*-diphenoxyphosphoryl-D-trehalose (9)**

$R_f$  0.9 (1 water : 4 isopropanol : 10 ethyl acetate),  $[\alpha]_D^{22} +31.4$  ( $c = 1.0$ , MeOH),  $^1\text{H}$  NMR (500MHz, MeOD)  $\delta$  ppm 3.34 (2H, t,  $J_{\text{H3-H4}} 9.7\text{Hz}$ ,  $J_{\text{H4-H5}} 9.7\text{Hz}$ , H4, H4'), 3.38 (1H, dd,  $J_{\text{H2-H3}} 9.7\text{Hz}$ ,  $J_{\text{H1-H2}} 3.5\text{Hz}$ , H2), 3.46 (1H, dd,  $J_{\text{H2'-H3'}} 9.9\text{Hz}$ ,  $J_{\text{H1'-H2'}} 3.9\text{Hz}$ , H2'), 3.78 (1H, t,  $J_{\text{H2'-H3'}} 9.4\text{Hz}$ ,  $J_{\text{H3'-H4'}} 9.4\text{Hz}$ , H3'), 3.80 (1H, t,  $J_{\text{H2-H3}} 9.4\text{Hz}$ ,  $J_{\text{H3-H4}} 9.4\text{Hz}$ , H3), 4.05 (2H, m, H5, H5'), 4.45 (1H, dd,  $J_{\text{H5-H6b}} 4.1\text{Hz}$ ,  $J_{\text{H6a-H6b}} 7.3\text{Hz}$ , H6b), 4.47 (1H, dd,  $J_{\text{H6a-H6b}} 7.1\text{Hz}$ ,  $J_{\text{H5-H6a}} 3.9\text{Hz}$ , H6a), 4.52 (1H, m, H6'b), 4.55 (1H, ddd,  $J_{\text{H6'a-H6'b}} 11.2\text{Hz}$ ,  $J_{\text{H6'b-31P}} 6.6\text{Hz}$ ,  $J_{\text{H5'-H6'b}} 2.0\text{Hz}$ , H6'b), 7.19-7.26 (6H, m, P-OPh ArH<sub>ortho</sub>, P-OPh ArH<sub>para</sub>), 7.35-7.41 (10H, m, P-OPh ArH<sub>ortho</sub>, P-OPh ArH<sub>meta</sub>, Si-Ph Ar<sub>ortho</sub>, Si-Ph Ar<sub>para</sub>), 7.71-7.74 (4H, m, Si-Ph ArH<sub>meta</sub>);  $^{13}\text{C}$  NMR (126MHz, MeOD)  $\delta$  ppm 20.3 (1C,  $\underline{\text{C}}(\text{CH}_3)_3$ ), 27.4 (3C,  $\text{C}(\underline{\text{C}}\text{H}_3)_3$ ), 69.9 (1C, d,  $J_{\text{C6'-31P}} 6.7\text{Hz}$ , C6'), 69.9 (1C, C6), 71.3 (1C, C5), 71.7 (1C, C4), 72.0 (1C, d,  $J_{\text{C5'-31P}} 6.7\text{Hz}$ , C5'), 73.1 (1C, C4'), 73.3 (1C, C2), 74.3 (1C, C2'), 74.6 (1C, C3), 74.9 (1C, C3'), 94.9 (1C, C1), 95.0 (1C, C1'), 121.2 (4C, d,  $J_{\text{C-31P}} 4.7\text{Hz}$ , P-OPh ArC<sub>ortho</sub>), 126.8 (2C, Si-Ph ArC<sub>para</sub>) 128.7 (2C, d,  $J_{\text{C-31P}} 4.8\text{Hz}$ , P-OPh ArC<sub>para</sub>), 130.8 (4C, Si-Ph ArC<sub>ortho</sub>), 131.1 (4C, d,  $J_{\text{C-31P}} 2.9\text{Hz}$ , P-OPh ArC<sub>meta</sub>), 134.8, 135.0 (2 x 1C, 2 x Si-Ph ArC<sub>ipso</sub>), 136.8, 137.9 (2 x 2C, 4 x Si-Ph ArC<sub>meta</sub>), 151.9 (2C, d,  $J_{\text{C-31P}} 6.7\text{Hz}$ , P-OPh ArC<sub>ipso</sub>);  $^{31}\text{P}\{^1\text{H}\}$  NMR (162MHz,  $\text{CDCl}_3$ )  $\delta$  ppm -12.1 (1P, P(O)(OPh)<sub>2</sub>); FT-IR (KBr disc)  $\nu$  3369 br (OH); HRMS  $m/z$  ( $\text{ES}^-$ ) 811.2556 [ $\text{M} - \text{H}$ ] $^-$  required (811.2556).

### **2,2',3,3',4,4',5,5',6,6'-O-acetyl-D-trehalose (10)**

$R_f$  0.02 (2 petrol : 1 ethyl acetate);  $[\alpha]_D^{25} +160$  ( $c = 1.0$ ,  $\text{CHCl}_3$ ), lit.<sup>4</sup>  $[\alpha]_D^{22} +160$  ( $c = 1.0$ ,  $\text{CHCl}_3$ ), m.p. 97-98°C (methanol), lit.<sup>4</sup> m.p. 98-100°C;  $^1\text{H}$  NMR (500MHz,  $\text{CDCl}_3$ )  $\delta$  ppm 2.02, 2.04, 2.07, 2.07 (4 x 6H, 4 x s, 8 x OAc), 4.00 (2H, dd,  $J_{\text{H6a-H6b}}$  12.1,  $J_{\text{H5-H6b}}$  2.0Hz, H6b), 4.04 (2H, ddd,  $J_{\text{H4-H5}}$  10.1Hz,  $J_{\text{H5-H6a}}$  5.4Hz,  $J_{\text{H5-H6b}}$  2.7Hz, H5), 4.23 (1H, dd,  $J_{\text{H6a-H6b}}$  12.0Hz,  $J_{\text{H5-H6a}}$  5.7Hz, H6a), 5.03 (1H, dd,  $J_{\text{H2-H3}}$  10.4Hz,  $J_{\text{H1-H2}}$  3.8Hz, H2), 5.03 (1H, t,  $J_{\text{H3-H4}}$  9.9Hz,  $J_{\text{H4-H5}}$  9.9Hz, H4), 5.28 (1H, d,  $J_{\text{H1-H2}}$  3.8Hz, H1), 5.48 (1H, t,  $J_{\text{H2-H3}}$  9.8Hz,  $J_{\text{H3-H4}}$  9.8Hz, H3);  $^{13}\text{C}$  NMR (126MHz,  $\text{CDCl}_3$ )  $\delta$  ppm 20.5, 20.6, 20.6, 20.6 (4 x 2C, 8 x  $\text{COCH}_3$ ), 61.7 (2C, C6), 68.1 (2C, C5), 68.5 (2C, C4), 69.8 (2C, C2), 69.9 (2C, C3), 92.2 (2C, C1), 169.5, 169.6, 169.9, 170.5 (4 x 2C, 8 x C=O); m/z 696.6  $[\text{M} + \text{NH}_4]^+$ , 701.6  $[\text{M} + \text{Na}]^+$ , 737.6  $[\text{M} + \text{CH}_3\text{CN} + \text{NH}_4]^+$ .

### **6-O-(diphenoxyphosphoryl)-2,2',3,3',4,4',6,6'-O-acetyl-D-trehalose (11)**

$R_f$  0.8 (ethyl acetate),  $[\alpha]_D^{25} +50.7$  ( $c = 0.71$ ,  $\text{CHCl}_3$ );  $^1\text{H}$  NMR (500MHz,  $\text{CDCl}_3$ )  $\delta$  ppm 2.03, 2.05, 2.06, 2.06, 2.09, 2.10, 2.11 (7 x 3H, 7 x s, 7 x OAc), 4.01 (1H, dd,  $J_{\text{H6'a-H6'b}}$  12.1Hz,  $J_{\text{H5-H6'b}}$  2.0Hz, H6'b), 4.06 (1H, ddd,  $J_{\text{H4'-H5'}}$  10.2Hz,  $J_{\text{H5'-H6'a}}$  5.5Hz,  $J_{\text{H5'-H6'b}}$  1.9Hz, H5'), 4.14 (1H, ddd,  $J_{\text{H4-H5}}$  10.2Hz,  $J_{\text{H5-H6a}}$  5.1Hz,  $J_{\text{H5-H6b}}$  2.1Hz, H5), 4.24 (1H, dd,  $J_{\text{H6'a-H6'b}}$  12.3Hz,  $J_{\text{H5'-H6'a}}$  5.7Hz, H6'a), 4.25 (1H, add,  $J_{\text{H6a-H6b}}$  11.0Hz,  $J_{\text{H6b-31P}}$  6.3Hz, H6b), 4.31 (1H, ddd,  $J_{\text{H6a-H6b}}$  11.4Hz,  $J_{\text{H6a-31P}}$  6.6Hz,  $J_{\text{H5-H6a}}$  5.7Hz, H6a), 4.96 (1H, dd,  $J_{\text{H2-H3}}$  10.2Hz,  $J_{\text{H1-H2}}$  3.9Hz, H2), 5.05 (1H, t,  $J_{\text{H3-H4}}$  9.3Hz,  $J_{\text{H4-H5}}$  9.3Hz, H4), 5.05 (1H, dd,  $J_{\text{H2'-H3'}}$  10.1Hz,  $J_{\text{H1'-H2'}}$  4.7Hz, H2'), 5.06 (1H, t,  $J_{\text{H3'-H4'}}$  9.6Hz,  $J_{\text{H4'-H5'}}$  9.6Hz, H4'), 5.13 (1H, d,  $J_{\text{H1-H2}}$  3.8Hz, H1), 5.21 (1H, d,  $J_{\text{H1'-H2'}}$  4.1Hz, H1'), 5.46 (1H, t,  $J_{\text{H2'-H3'}}$  9.8Hz,  $J_{\text{H3'-H4'}}$  9.8Hz, H3'), 5.49 (1H, t,  $J_{\text{H2-H3}}$  9.8Hz,  $J_{\text{H3-H4}}$  9.8Hz, H3), 7.20-7.26 (6H, m,  $\text{ArH}_{\text{ortho}}$ ,  $\text{ArH}_{\text{para}}$ ), 7.35 (2H, t,  $J_{\text{ortho-meta}}$  7.9Hz,  $J_{\text{meta-para}}$  7.9Hz,  $\text{ArH}_{\text{meta}}$ ), 7.36 (2H, t,  $J_{\text{ortho-meta}}$  7.9Hz,  $J_{\text{meta-para}}$  7.9Hz,  $\text{ArH}_{\text{meta}}$ );  $^{13}\text{C}$  NMR (126MHz,  $\text{CDCl}_3$ )  $\delta$  ppm 20.5, 20.5, 20.6 (x3), 20.7, 20.7 (7 x 1C, 7 x  $\text{COCH}_3$ ), 61.7

(1C, C6'), 66.6 (1C, d,  $J_{C-31P}$  4.8Hz, C6), 68.2 (1C, C5'), 68.4 (1C, C4'), 68.4 (1C, C4), 68.7 (1C, d,  $J_{C-31P}$  7.6Hz, C5), 69.5 (1C, C2'), 69.7 (1C, C2), 69.9 (1C, C3'), 70.1 (1C, C3), 92.5 (1C, C1'), 92.8 (1C, C1), 120.0 (2C, d,  $J_{C-31P}$  2.9Hz, ArC<sub>ortho</sub>), 120.0 (2C, d,  $J_{C-31P}$  2.9Hz, ArC<sub>ortho</sub>), 125.5 (2C, ArC<sub>para</sub>), 129.8 (4C, ArC<sub>meta</sub>), 150.3 (1C, d,  $J_{C-31P}$  5.7Hz, ArC<sub>ipso</sub>), 150.4 (1C, d,  $J_{C-31P}$  4.8Hz, ArC<sub>ipso</sub>), 169.3, 169.5, 169.5, 169.6, 170.0, 170.0, 170.6 (7 x 1C, 7 x C=O);  $^{31}P\{^1H\}$  NMR (162MHz, CDCl<sub>3</sub>)  $\delta$  ppm -11.8 (1P, P(O)(OPh)<sub>2</sub>); FT-IR (thin film)  $\nu$  1241 (P=O), 1723 (C=O); HRMS (ES<sup>+</sup>) m/z 891.2083 [M + Na]<sup>+</sup> (required 891.2083).

**6,6'-O-di(diphenoxyphosphoryl), 2,2',3,3',4,4'-O-acetyl-D-trehalose (12)**

R<sub>f</sub> 0.33 (2 ethyl acetate : 1 petrol),  $[\alpha]_D^{19}$  +80.4 (c = 1.0, CHCl<sub>3</sub>);  $^1H$  NMR (500MHz, CDCl<sub>3</sub>)  $\delta$  ppm 2.02, 2.03, 2.04 (3 x 6H, 3 x s, 6 x CH<sub>3</sub>), 4.12 (2H, ddd,  $J_{H4-H5}$  10.1Hz,  $J_{H5-H6a}$  6.6Hz,  $J_{H5-H6b}$  2.0Hz, H5), 4.22 (2H, ddd,  $J_{H6a-H6b}$  11.1Hz,  $J_{H6b-31P}$  6.6Hz,  $J_{H5-H6b}$  2.2Hz, H6b), 4.29 (2H, ddd,  $J_{H6a-H6b}$  11.4Hz,  $J_{H6a-31P}$  6.6Hz,  $J_{H5-H6a}$  5.4Hz, H6a), 4.96 (2H, dd,  $J_{H2-H3}$  10.2Hz,  $J_{H1-H2}$  3.9Hz, H2), 5.00 (2H, d,  $J_{H1-H2}$  3.8Hz, H1), 5.03 (2H, dd,  $J_{H4-H5}$  10.2,  $J_{H3-H4}$  9.3Hz, H4), 5.43 (2H, dd,  $J_{H2-H3}$  10.1Hz,  $J_{H3-H4}$  9.5Hz, H3), 7.16-7.22 (12H, m, ArH<sub>ortho</sub>, ArH<sub>para</sub>), 7.32-7.36 (8H, m, ArH<sub>meta</sub>);  $^{13}C$  NMR (126MHz, CDCl<sub>3</sub>)  $\delta$  ppm 20.5, 20.6, 20.7 (3 x 2C, CH<sub>3</sub>), 66.6 (2C, d,  $J_{C6-31P}$  5.7Hz, C6), 68.3 (2C, C4), 68.7 (2C, d,  $J_{C5-31P}$  8.6Hz, C5), 69.3 (2C, C2), 70.1 (2C, C3), 93.0 (2C, C1), 120.0 (8C, d,  $J_{C-31P}$  4.8Hz, ArC<sub>ortho</sub>), 125.5 (4C, ArC<sub>para</sub>), 129.8 (8C, ArC<sub>meta</sub>), 150.3 (2C, d,  $J_{C-31P}$  6.7Hz, ArC<sub>ipso</sub>), 150.4 (2C, d,  $J_{C-31P}$  7.6Hz, ArC<sub>ipso</sub>), 169.3, 169.4, 170.0 (3 x 2C, C=O);  $^{31}P\{^1H\}$  NMR (162MHz, CDCl<sub>3</sub>)  $\delta$  ppm -11.9 (1P, P(O)(OPh)<sub>2</sub>); FT-IR (thin film)  $\nu$  1248 (P=O), 1755 (C=O); HRMS m/z (ES<sup>+</sup>) 1081.23 (100%), 1082.23 (52%), 1083.24 (17%), 1084.24 (4%) required 1081.23 (100%), 1082.23 (53%), 1083.23 (19%), 1084.24 (5%).

**6-*O*-ditertbutyldiphenylsilyl, 2,2',3,3',4,4',6'-acetyl-D-trehalose (13)**

$R_f$  0.17 (2 petrol : 1 ethyl acetate),  $[\alpha]_D^{25} +119.4$  ( $c = 1.0$ ,  $\text{CHCl}_3$ ), m.p. 154-156°C (ethyl acetate/petrol);  $^1\text{H}$  NMR (500MHz,  $\text{CDCl}_3$ )  $\delta$  ppm 1.03 (9H, s,  $\text{tBu}$ ), 1.92, 1.96, 2.01, 2.04, 2.05, 2.10, 2.10 (7 x 3H, 7 x s, 7 x OAc), 3.65 (2H, ad,  $J$  3.2Hz, H6'a, H6'b), 3.94 (1H, dt,  $J_{\text{H4}'-\text{H5}'}$  10.2Hz,  $J_{\text{H5}'-\text{H6}'a}$  3.0Hz,  $J_{\text{H5}'-\text{H6}'b}$  3.0Hz, H5'), 4.04 (1H, dd,  $J_{\text{H6a}-\text{H6b}}$  12.0Hz,  $J_{\text{H5}-\text{H6b}}$  1.9Hz, H6b), 4.07 (1H, ddd,  $J_{\text{H4}-\text{H5}}$  10.4Hz,  $J_{\text{H5}-\text{H6a}}$  5.5Hz,  $J_{\text{H5}-\text{H6b}}$  2.0Hz, H5), 4.24 (1H, dd,  $J_{\text{H6a}-\text{H6b}}$  11.8Hz,  $J_{\text{H5}-\text{H6a}}$  5.2Hz, H6a), 5.03 (1H, dd,  $J_{\text{H2}-\text{H3}}$  10.2Hz,  $J_{\text{H1}-\text{H2}}$  3.9Hz, H2), 5.06 (1H, t,  $J_{\text{H3}-\text{H4}}$  8.7Hz,  $J_{\text{H4}-\text{H5}}$  8.7Hz, H4), 5.06 (1H, dd,  $J_{\text{H2}'-\text{H3}'}$  10.7Hz,  $J_{\text{H1}'-\text{H2}'}$  3.5Hz, H2'), 5.26 (1H, t,  $J_{\text{H3}'-\text{H4}'}$  9.8Hz,  $J_{\text{H4}'-\text{H5}'}$  9.8Hz, H4'), 5.25 (1H, d,  $J_{\text{H1}'-\text{H2}'}$  3.8Hz, H1'), 5.32 (1H, d,  $J_{\text{H1}-\text{H2}}$  4.1Hz, H1), 5.47 (1H, t,  $J_{\text{H2}-\text{H3}}$  9.8Hz,  $J_{\text{H3}-\text{H4}}$  9.8Hz, H3), 5.49 (1H, t,  $J_{\text{H2}'-\text{H3}'}$  10.1Hz,  $J_{\text{H3}'-\text{H4}'}$  10.1Hz, H3'), 7.31-7.47 (6H, m,  $\text{ArH}_{\text{ortho}}$ ,  $\text{ArH}_{\text{para}}$ ), 7.62 (4H, ddd,  $^3J$  10.9Hz,  $^3J$  8.0Hz,  $^4J$  1.3Hz,  $\text{ArH}_{\text{meta}}$ );  $^{13}\text{C}$  NMR (126MHz,  $\text{CDCl}_3$ )  $\delta$  ppm 19.1 (1C,  $\underline{\text{C}}(\text{CH}_3)_3$ ), 20.4, 20.6, 20.7 (3 x 1C, 3 x  $\text{CO}\underline{\text{C}}\text{H}_3$ ), 20.6, 20.6 (2 x 2C, 4 x  $\text{CO}\underline{\text{C}}\text{H}_3$ ), 26.7 (3C,  $\text{C}(\underline{\text{C}}\text{H}_3)_3$ ), 61.8 (1C, C6), 61.8 (1C, C6'), 68.1 (1C, C5), 68.4 (1C, C4'), 68.4 (1C, C4), 69.6 (1C, C2'), 70.1 (1C, C2), 70.2 (1C, C3), 70.4 (1C, C3'), 70.6 (1C, C5'), 92.4 (1C, C1'), 92.5 (1C, C1), 127.7 (4C,  $\text{ArC}_{\text{ortho}}$ ), 129.8 (2C,  $\text{ArC}_{\text{para}}$ ), 129.8 (2C,  $\text{ArC}_{\text{para}}$ ), 132.8 (2C,  $\text{ArC}_{\text{ipso}}$ ), 132.8 (2C,  $\text{ArC}_{\text{ipso}}$ ), 135.6 (2C,  $\text{ArC}_{\text{meta}}$ ), 135.6 (2C,  $\text{ArC}_{\text{meta}}$ ), 169.3, 169.4, 169.5, 169.7, 169.9, 170.2, 170.6 (7 x 1C, 7 x C=O); FT-IR (KBr disc)  $\nu$  1754 (C=O); HRMS  $m/z$  ( $\text{ES}^+$ ) 897.2980 [ $\text{M} + \text{Na}$ ] $^+$  (required 897.2972).

**6,6'-O-ditertbutyldiphenylsilyl, 2,2',3,3',4,4'-acetyl-D-trehalose (14)**

$R_f$  0.35 (2 petrol : 1 ethyl acetate),  $[\alpha]_D^{25} +94.6$  ( $c = 1.4$ ,  $\text{CHCl}_3$ );  $^1\text{H}$  NMR (500MHz,  $\text{CDCl}_3$ )  $\delta$  ppm 1.06 (18H, s, 2 x  $t\text{Bu}$ ), 1.92, 1.96, 2.01 (3 x 6H, 3 x s, 6 x OAc), 3.67 (4H, ad,  $J$  3.2Hz, H6a, H6b), 3.93 (2H, dt,  $J_{\text{H4-H5}}$  10.3Hz,  $J_{\text{H5-H6a}}$  2.3Hz,  $J_{\text{H5-H6b}}$  2.3Hz, H5), 5.04 (2H, dd,  $J_{\text{H2-H3}}$  10.4Hz,  $J_{\text{H1-H2}}$  3.8Hz, H2), 5.28 (2H, t,  $J_{\text{H3-H4}}$  9.8Hz,  $J_{\text{H4-H5}}$  9.8Hz, H4), 5.27 (2H, d,  $J_{\text{H1-H2}}$  4.1Hz, H1), 5.46 (2H, t,  $J_{\text{H2-H3}}$  10.1Hz,  $J_{\text{H3-H4}}$  10.1Hz, H3), 7.34-7.47 (12H, m,  $\text{ArH}_{\text{ortho}}$ ,  $\text{ArH}_{\text{para}}$ ), 7.64 (8H, ddd,  $^3J$  13.7Hz,  $^3J$  7.9Hz,  $^4J$  1.4Hz,  $\text{ArH}_{\text{meta}}$ );  $^{13}\text{C}$  NMR (126MHz,  $\text{CDCl}_3$ )  $\delta$  ppm 19.2 (2C,  $\underline{\text{C}}(\text{CH}_3)_3$ ), 20.5, 20.6, 20.7 (3 x 2C, 6 x  $\text{CO}\underline{\text{C}}\text{H}_3$ ), 26.7 (6C,  $\text{C}(\underline{\text{C}}\text{H}_3)_3$ ), 61.8 (2C, C6), 68.4 (2C, C4), 69.9 (2C, C2), 70.5 (2C, C5), 70.8 (2C, C3), 92.6 (2C, C1), 127.7 (8C,  $\text{ArC}_{\text{ortho}}$ ), 129.8 (2C,  $\text{ArC}_{\text{para}}$ ), 129.8 (2C,  $\text{ArC}_{\text{para}}$ ), 132.8 (2C,  $\text{ArC}_{\text{ipso}}$ ), 132.9 (2C,  $\text{ArC}_{\text{ipso}}$ ), 135.6 (4C,  $\text{ArC}_{\text{meta}}$ ), 135.6 (4C,  $\text{ArC}_{\text{meta}}$ ), 169.3, 169.6, 170.2 (3 x 2C, 6 x C=O); FT-IR (KBr disc)  $\nu$  1756 (C=O); HRMS  $m/z$  ( $\text{ES}^+$ )  $[\text{M} + \text{Na}]^+$  peaks 1790.55 (100%), 1791.56 (88%), 1792.55 (41%), 1793.54 (13%), 1794.57 (5.0%), required, 1790.55 (100%), 1791.56 (84%), 1792.56 (44%), 1793.56 (18%), 1794.57 (6%); elemental C (57.72%) H (6.25%), required C (57.65%) H (6.22%).

**5. NMR spectra**

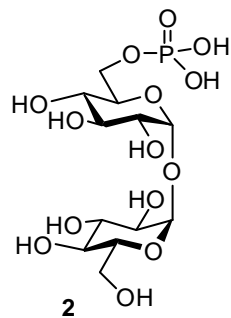

**Frequency (MHz)** 500.30  
**Nucleus** 1H  
**Number of Transients** 128  
**Origin** avc500  
**Pulse Sequence** zg30  
**Receiver Gain** 4.00  
**SW(cyclical) (Hz)** 10330.58  
**Solvent** DEUTERIUM OXIDE  
**Spectrum Offset (Hz)** 3089.5557  
**Sweep Width (Hz)** 10330.26  
**Temperature (degree C)** 27.000

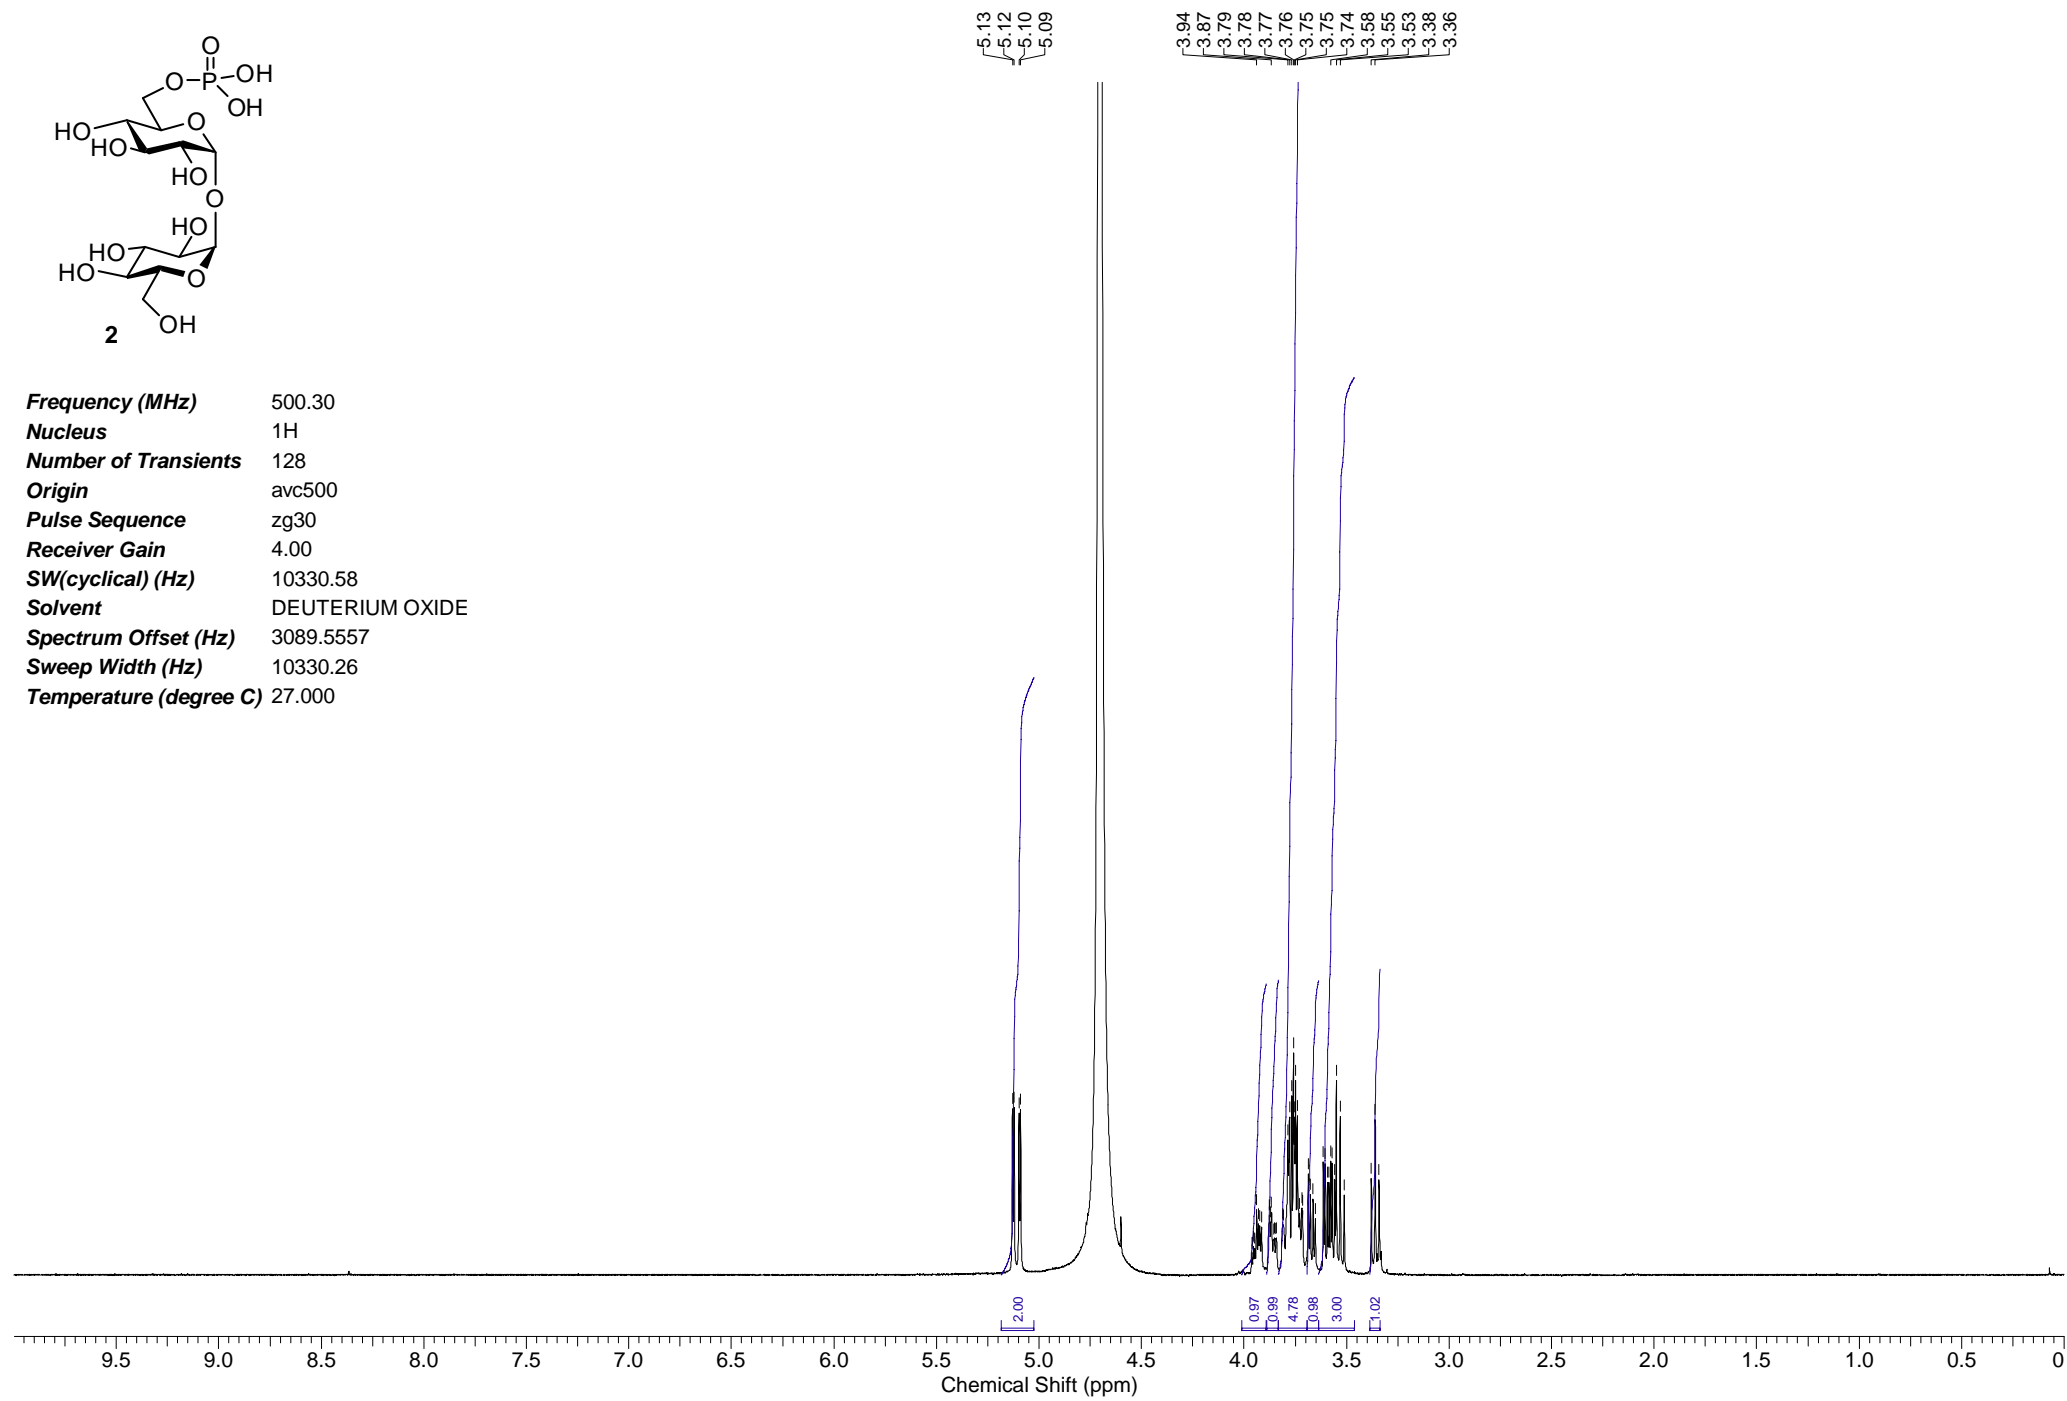

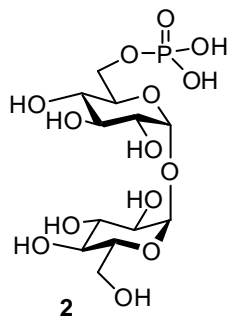

**Frequency (MHz)** 125.80  
**Nucleus**  $^{13}\text{C}$   
**Number of Transients** 1024  
**Origin** avc500  
**Pulse Sequence** zgpg30  
**Receiver Gain** 1820.00  
**SW(cyclical) (Hz)** 31250.00  
**Solvent** DEUTERIUM OXIDE  
**Spectrum Offset (Hz)** 12580.1094  
**Sweep Width (Hz)** 31249.05  
**Temperature (degree C)** 27.000

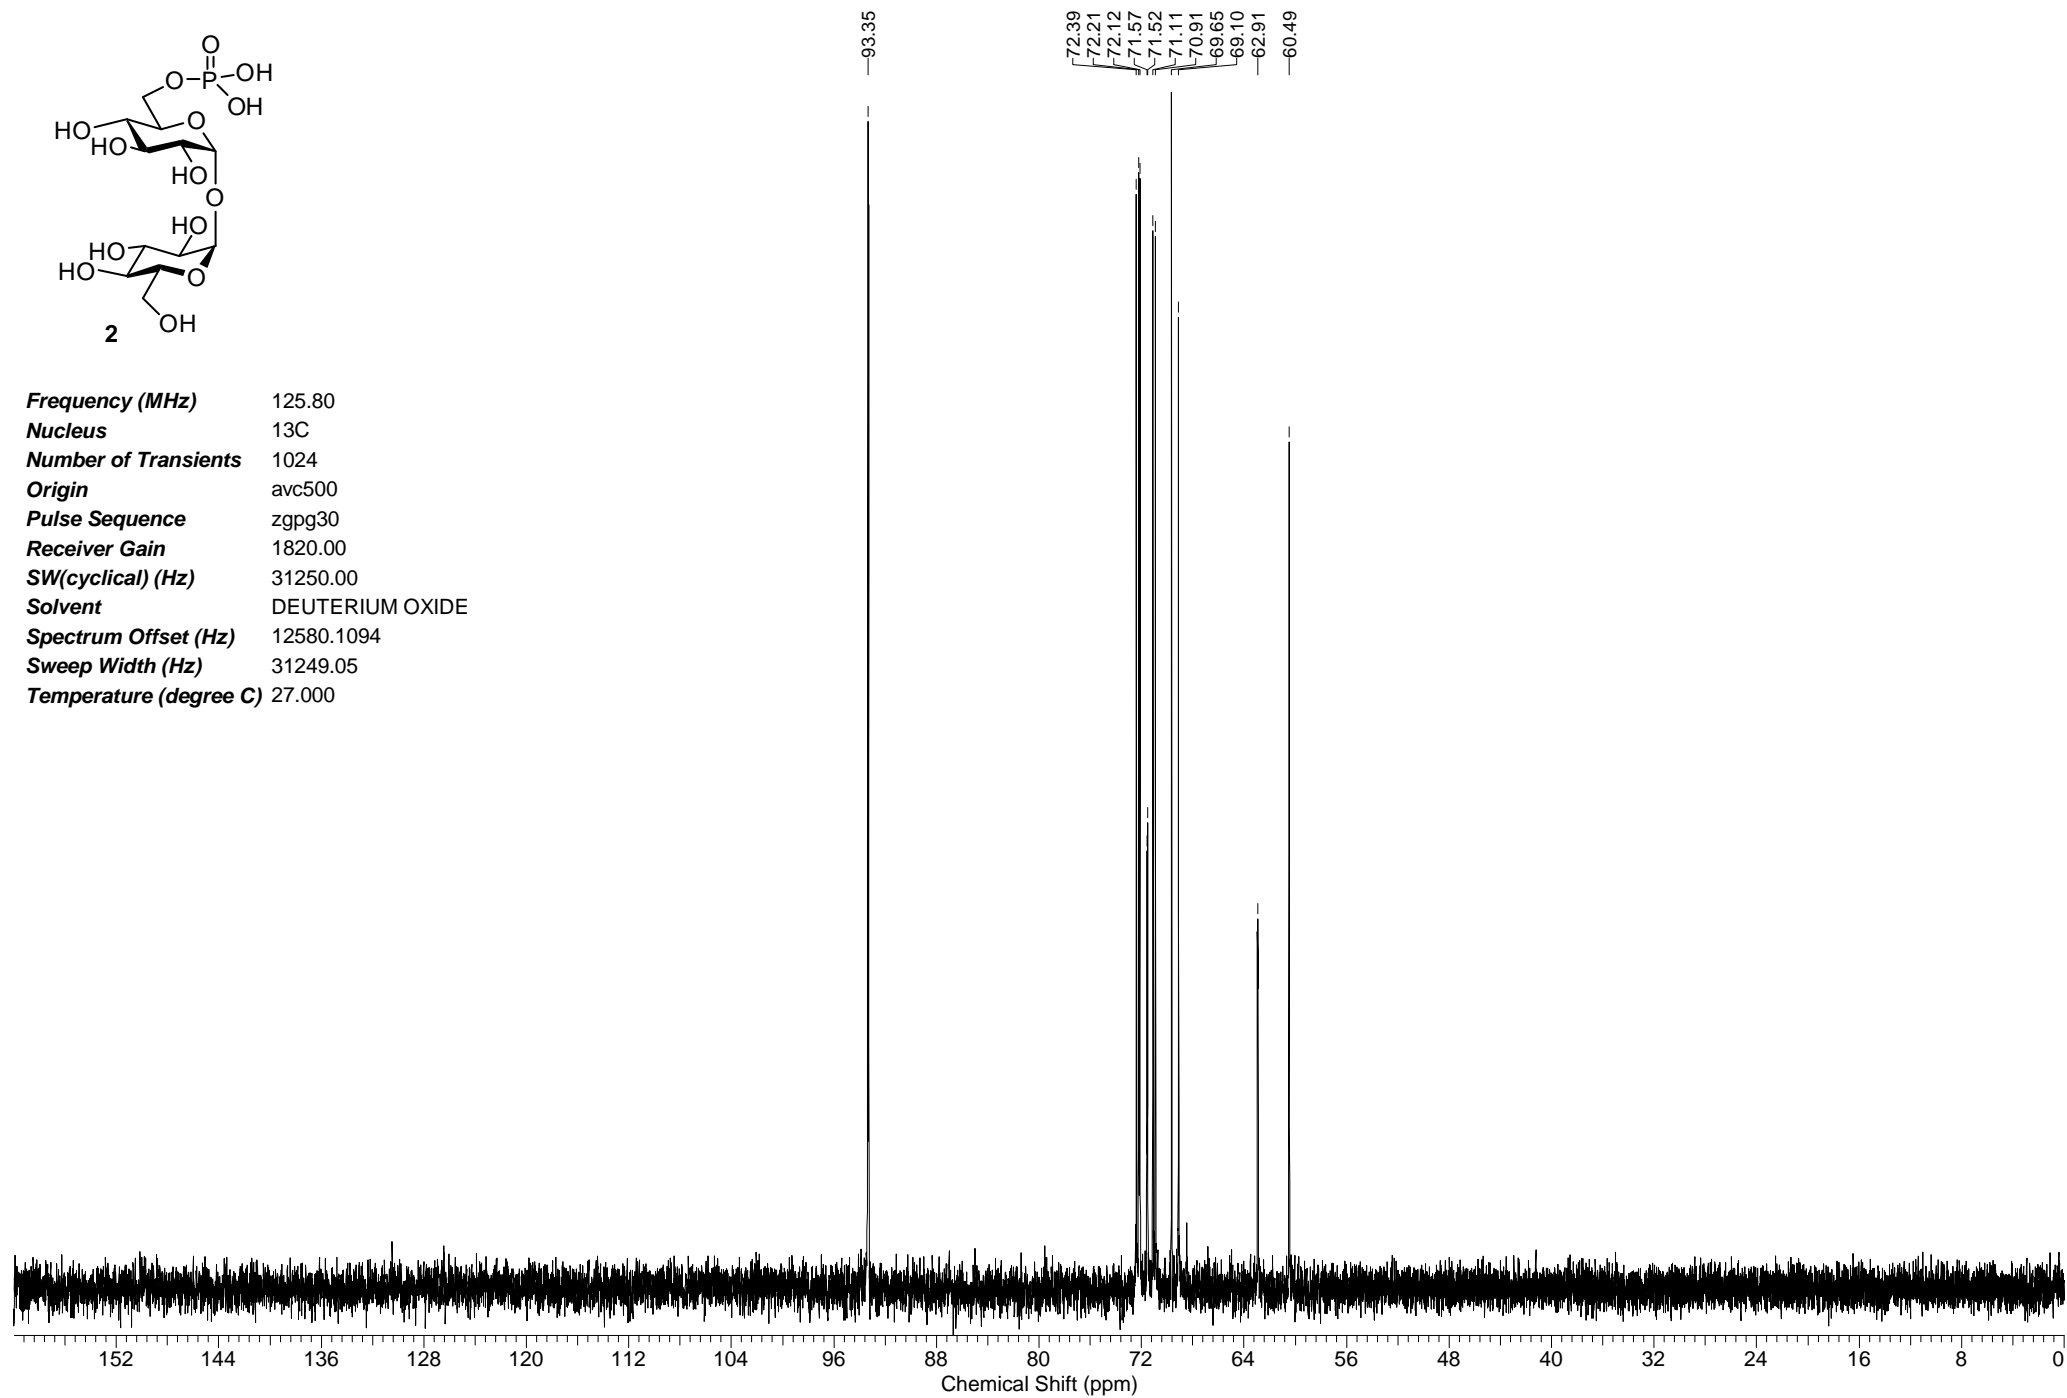



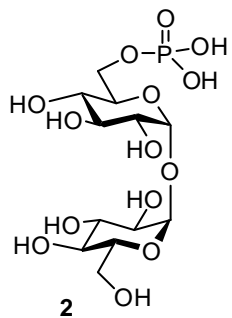

**Frequency (MHz)** 162.00  
**Nucleus** 31P  
**Number of Transients** 32  
**Origin** av400  
**Pulse Sequence** zgpg30  
**Receiver Gain** 26008.00  
**SW(cyclical) (Hz)** 64935.07  
**Solvent** DEUTERIUM OXIDE  
**Spectrum Offset (Hz)** -7274.8262  
**Sweep Width (Hz)** 64933.09  
**Temperature (degree C)** 27.000

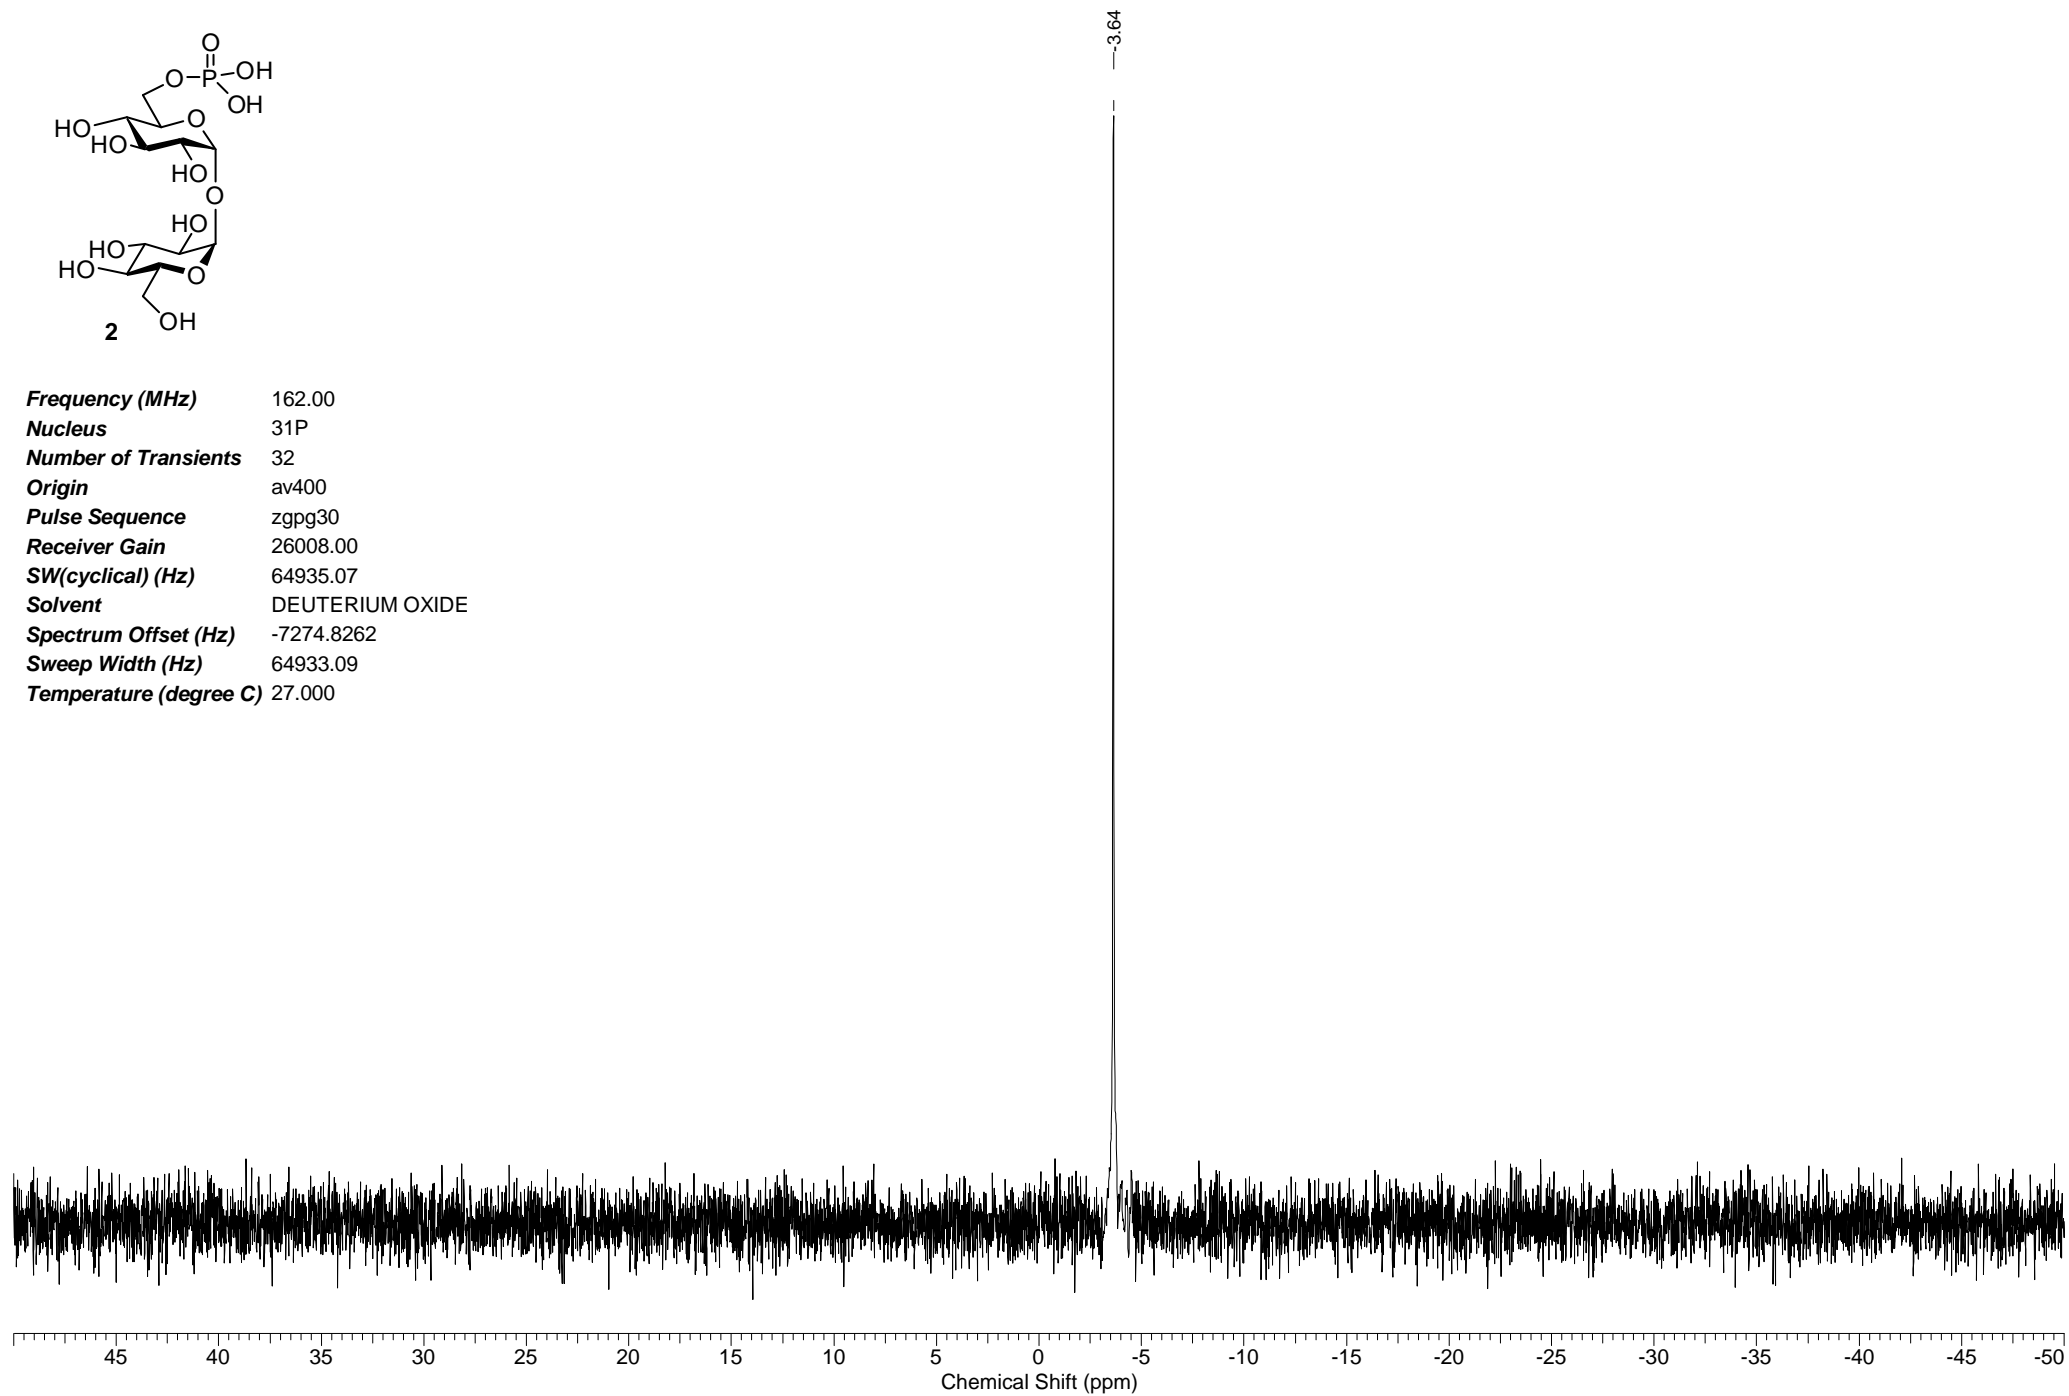

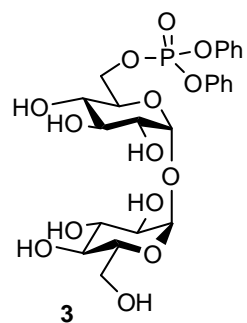

**Frequency (MHz)** 500.30  
**Nucleus** 1H  
**Number of Transients** 16  
**Origin** avc500  
**Pulse Sequence** zg30  
**Receiver Gain** 4.00  
**SW(cyclical) (Hz)** 10330.58  
**Solvent** MeOD  
**Spectrum Offset (Hz)** 3089.5557  
**Sweep Width (Hz)** 10330.26  
**Temperature (degree C)** 27.000

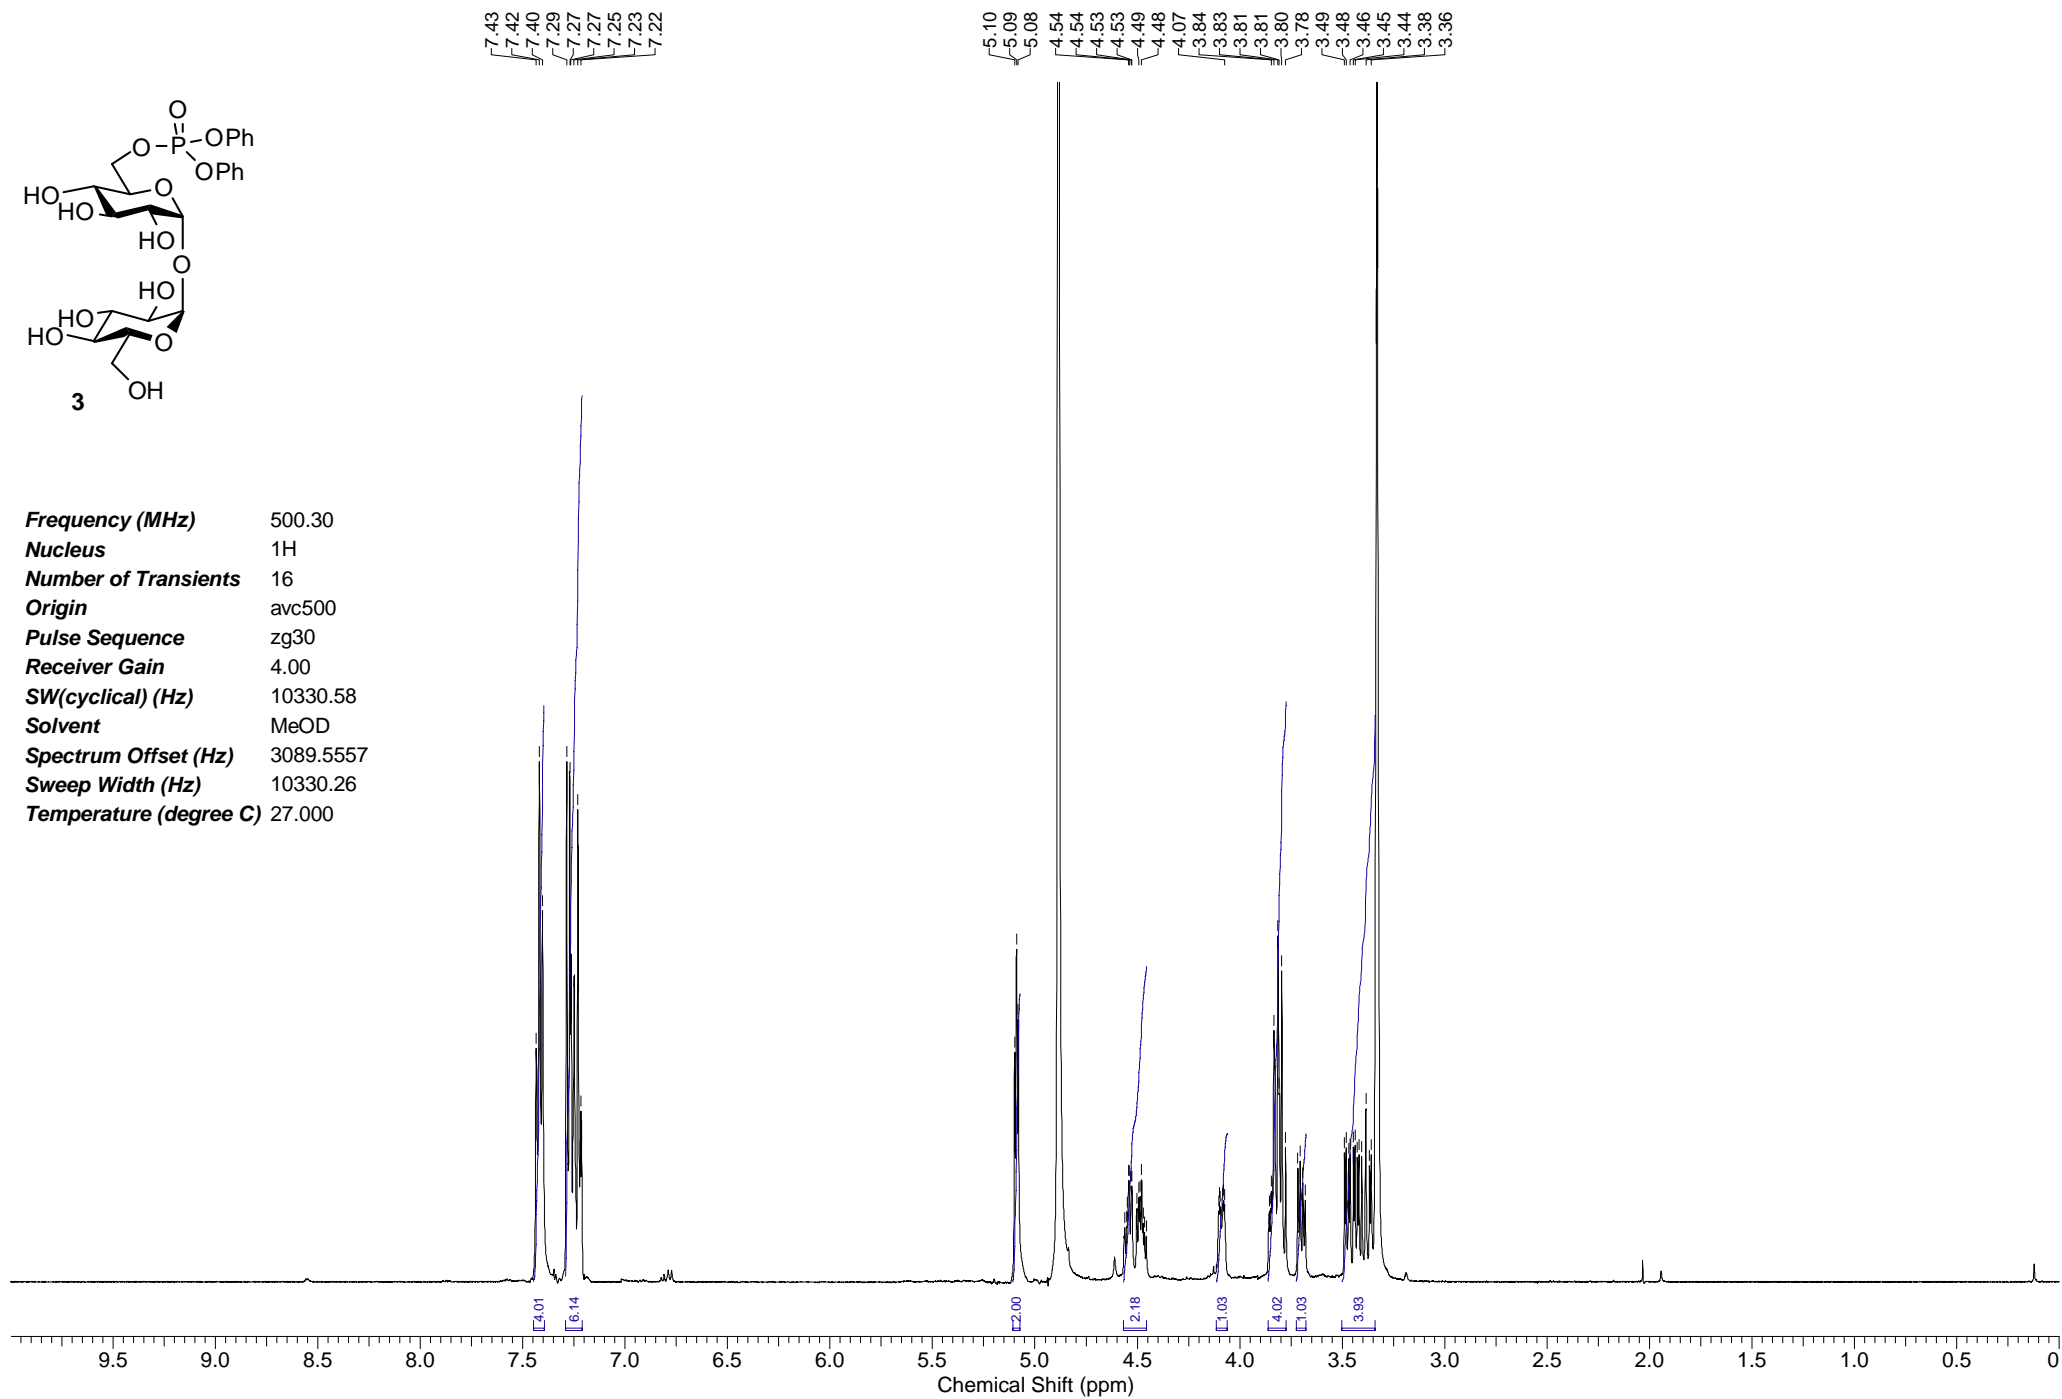

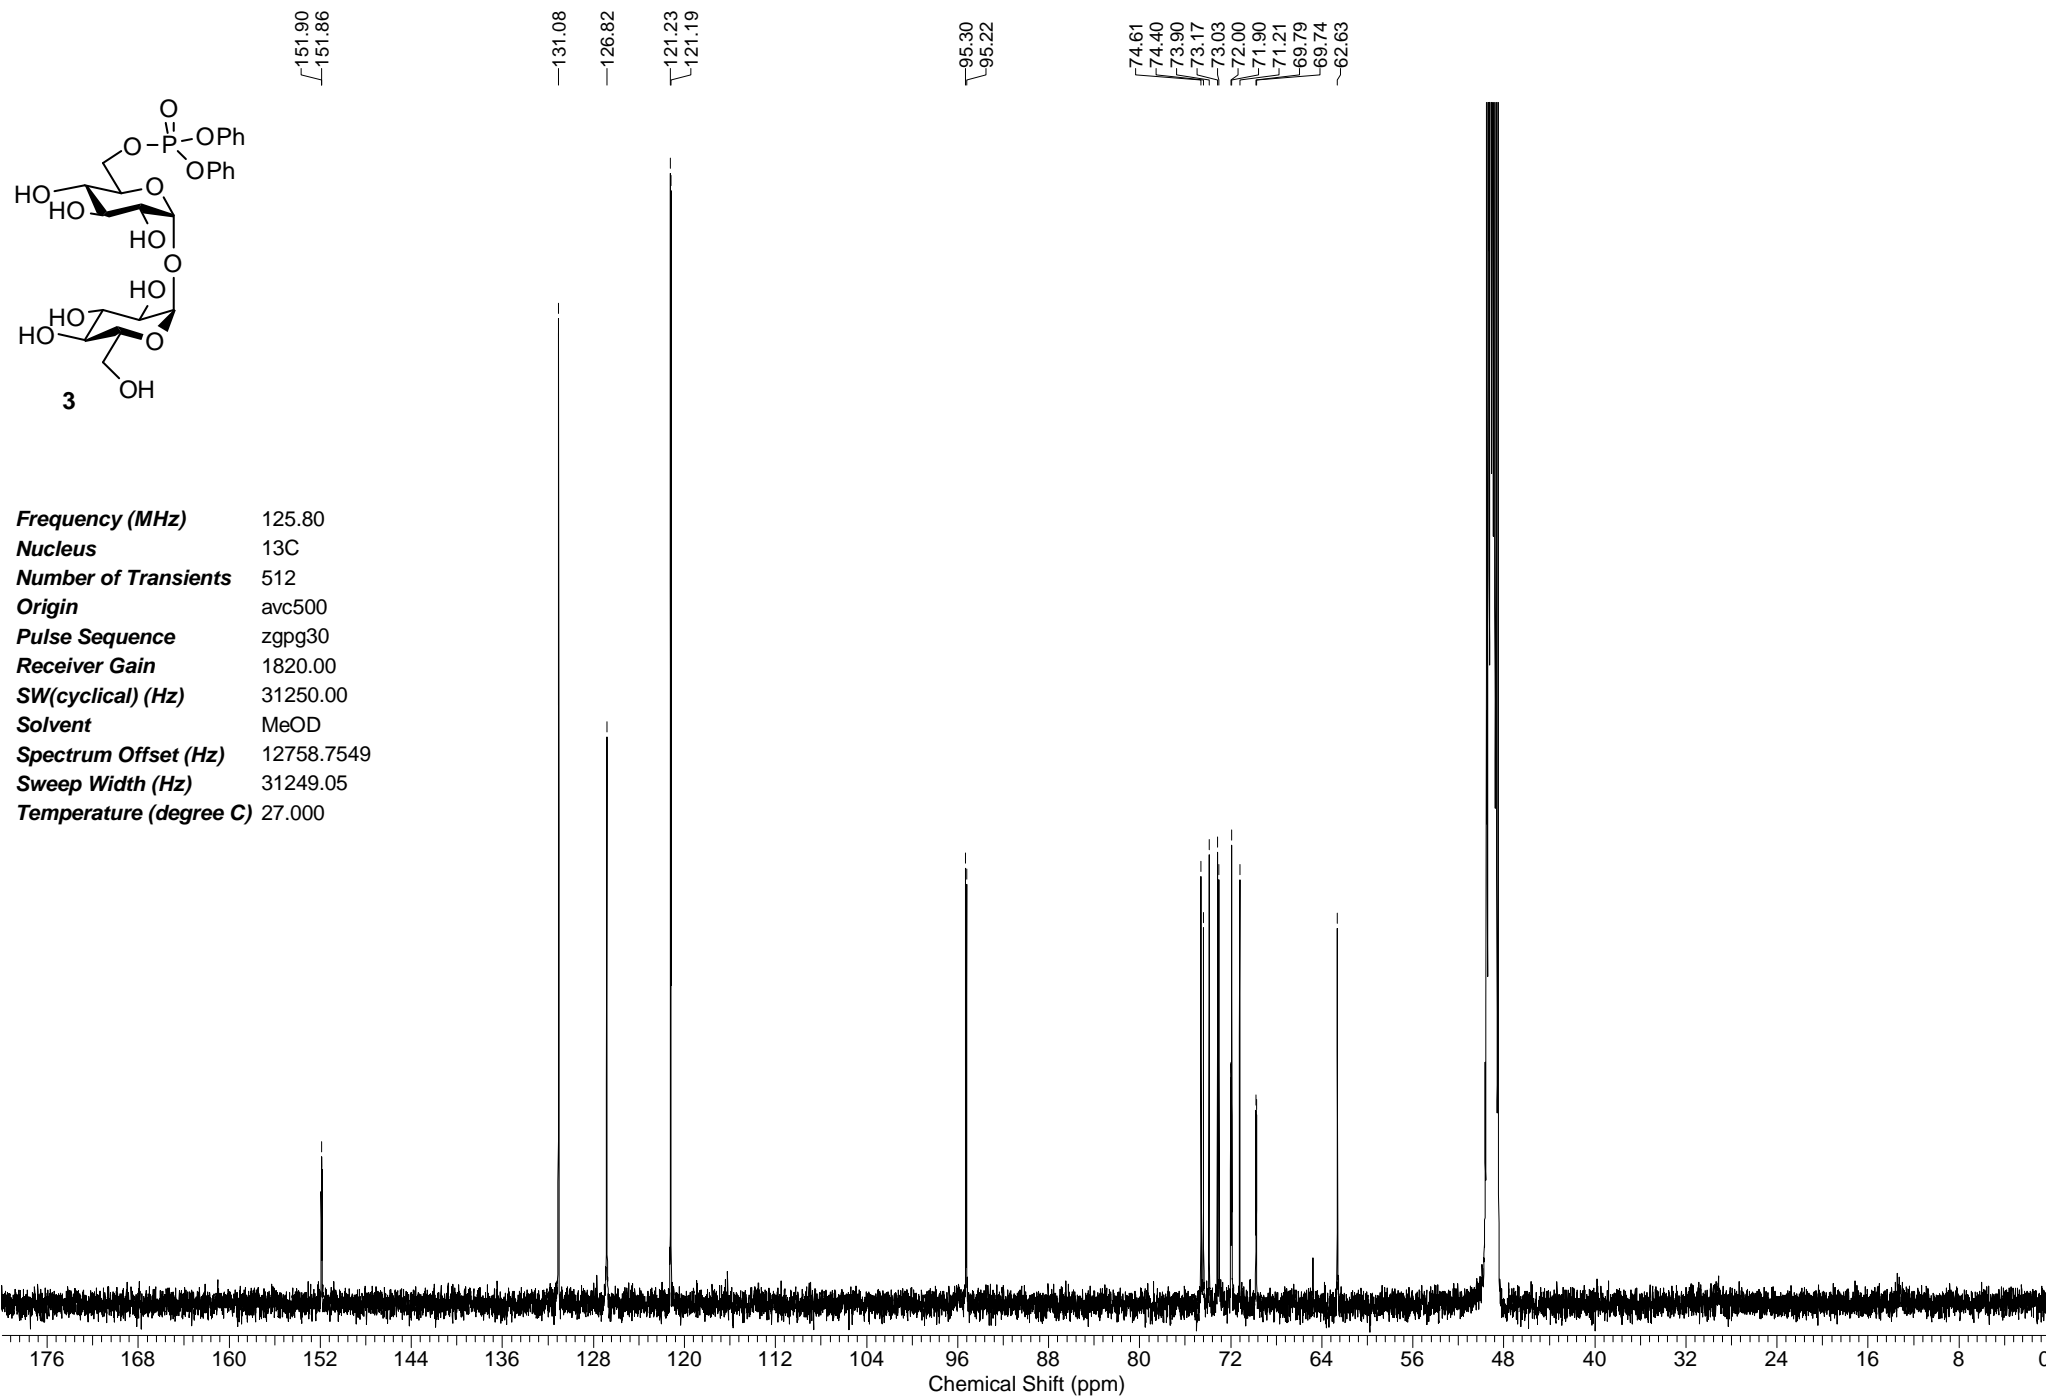



**Frequency (MHz)** 162.00  
**Nucleus** 31P  
**Number of Transients** 32  
**Origin** av400  
**Pulse Sequence** zgpg30  
**Receiver Gain** 18390.40  
**SW(cyclical) (Hz)** 64935.07  
**Solvent** MeOD  
**Spectrum Offset (Hz)** -8126.5610  
**Sweep Width (Hz)** 64933.09  
**Temperature (degree C)** 27.000

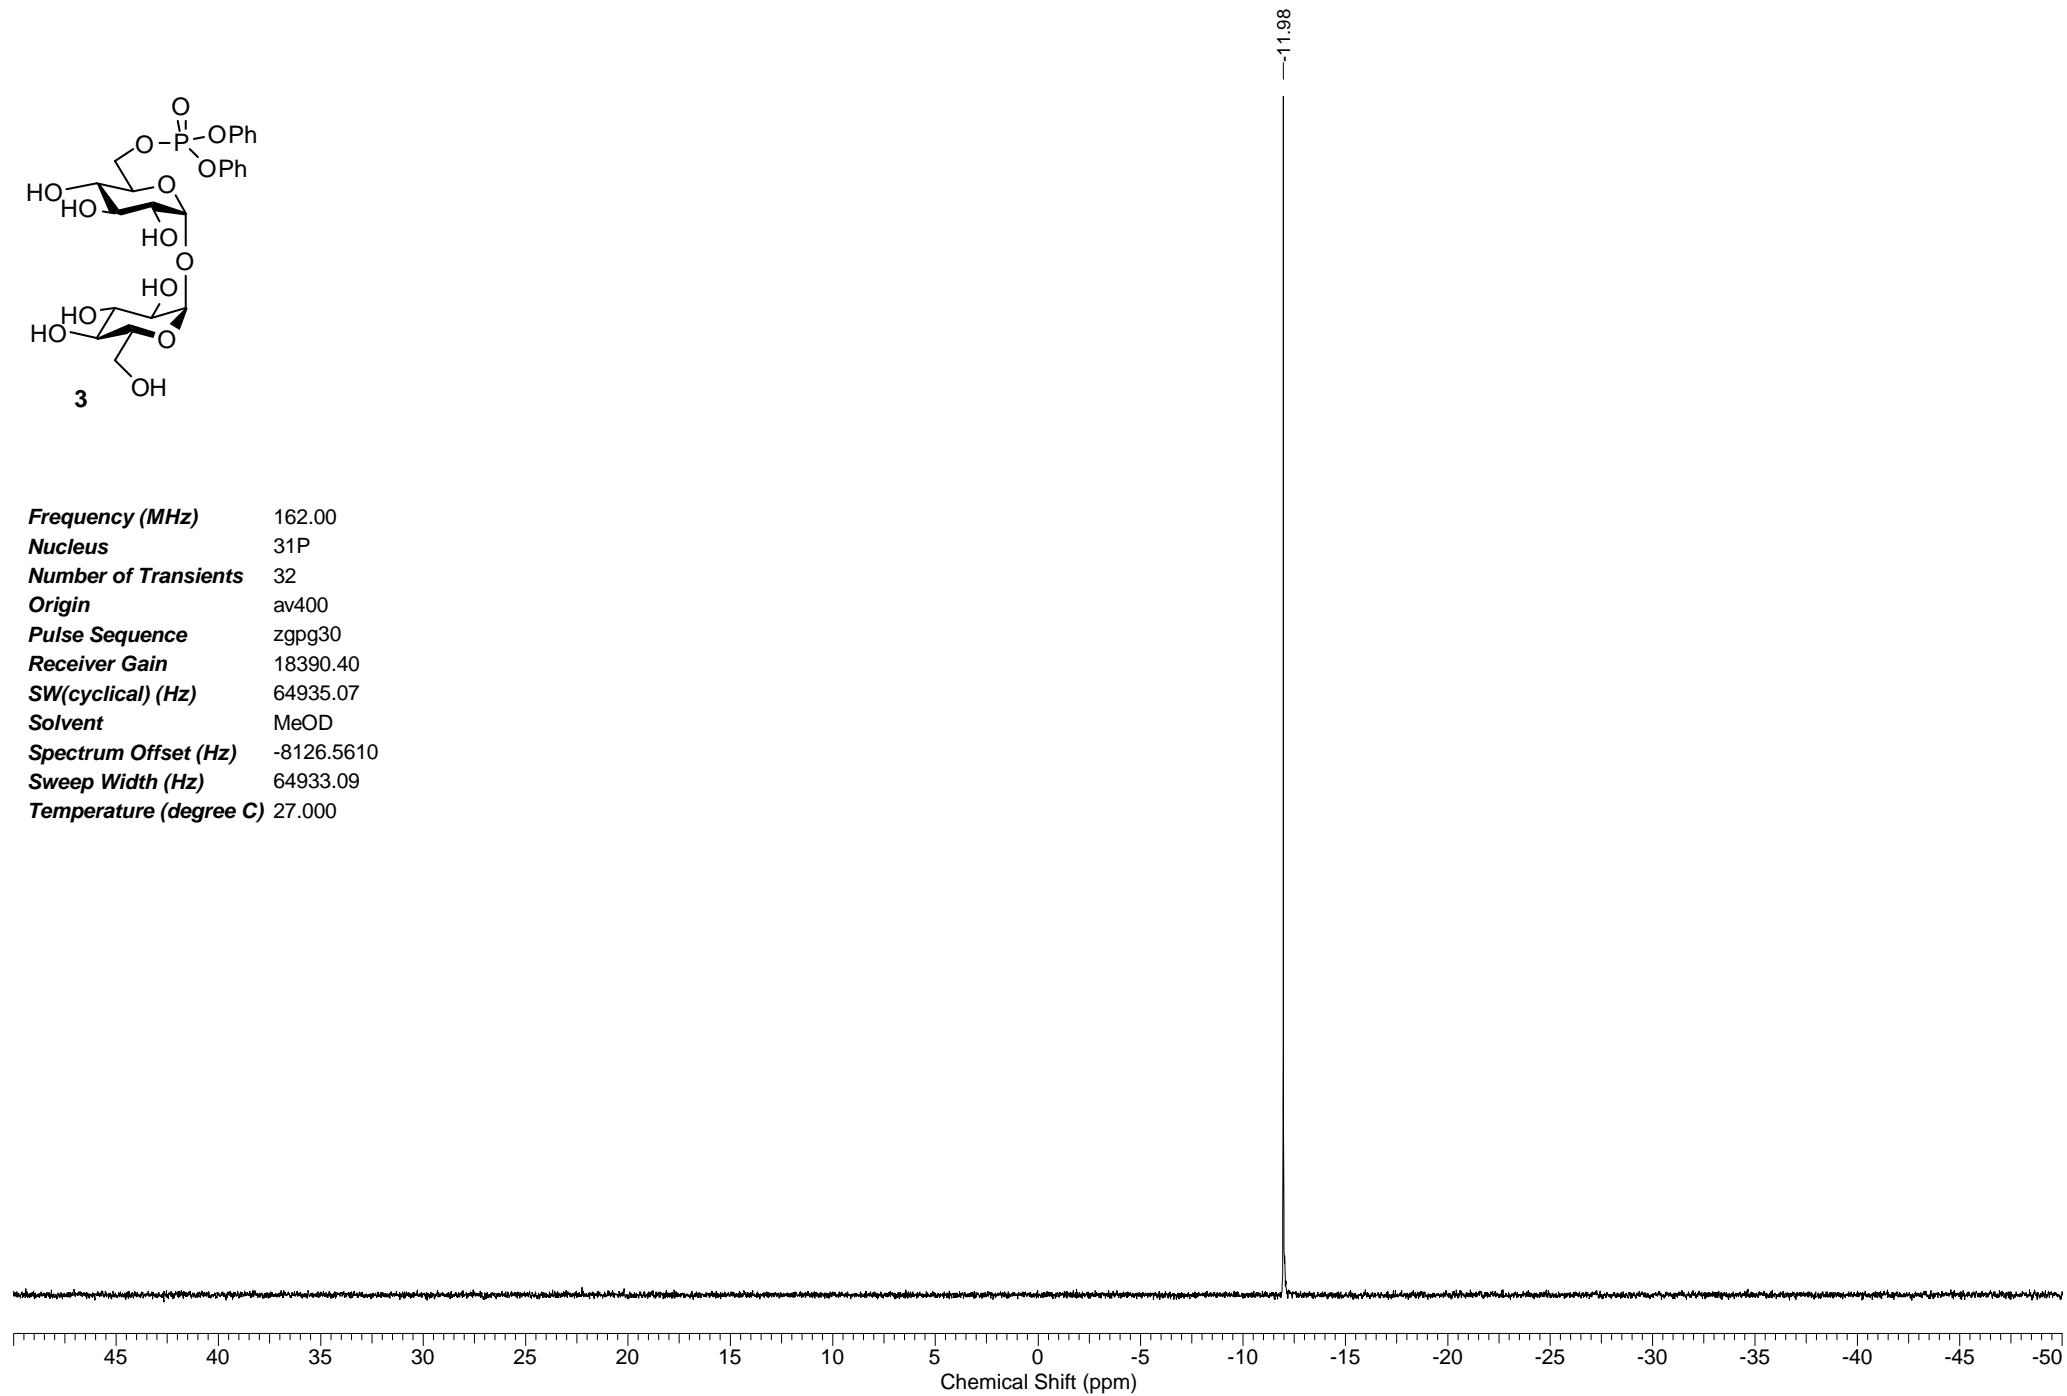

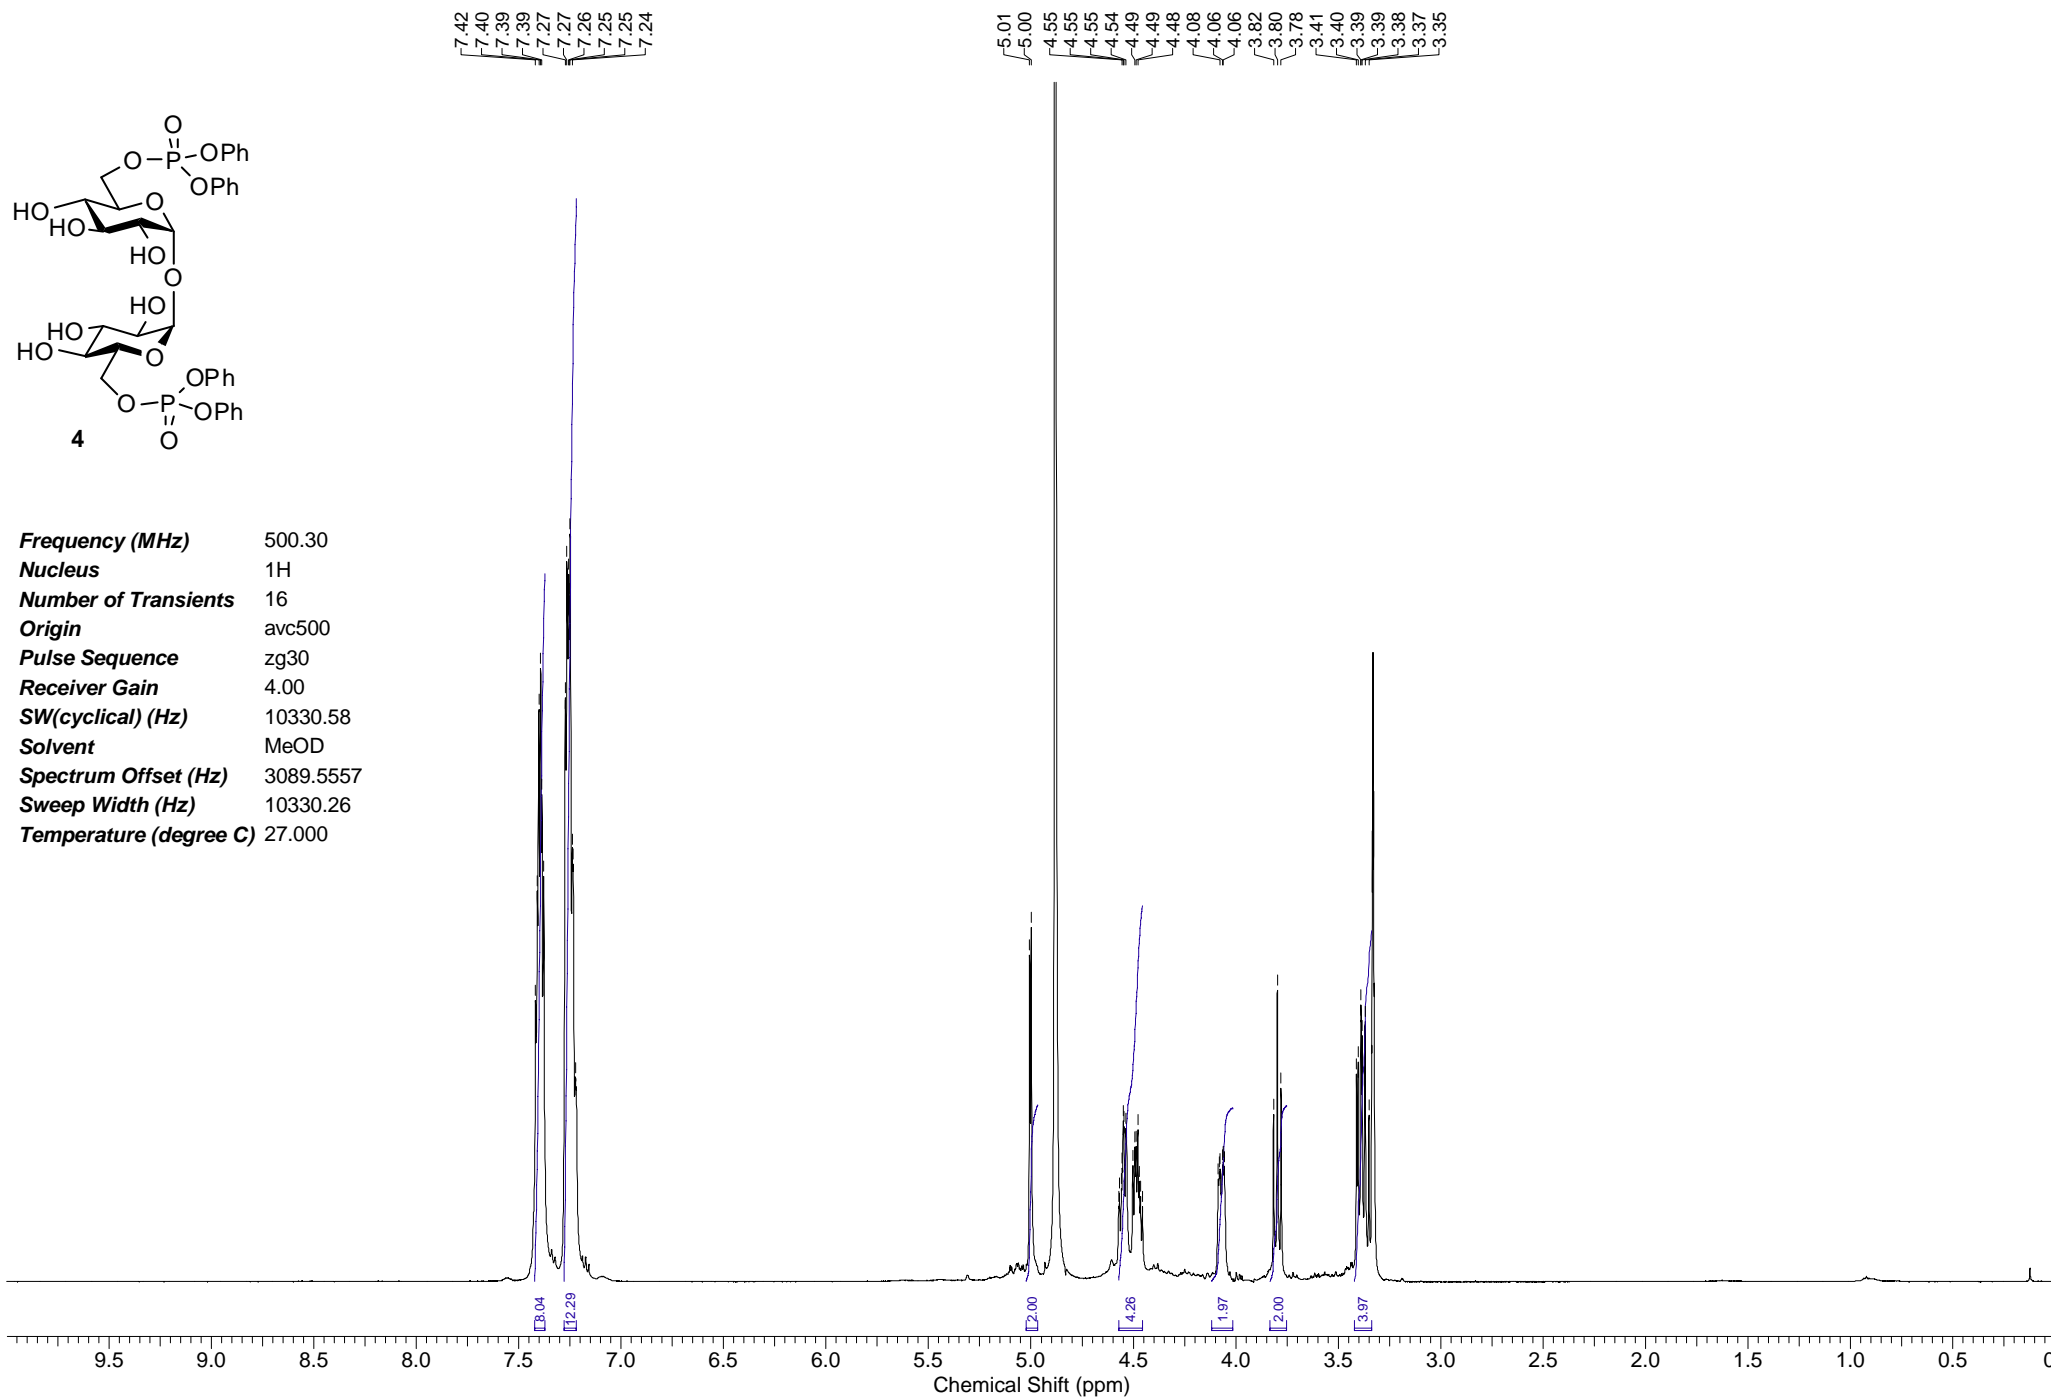

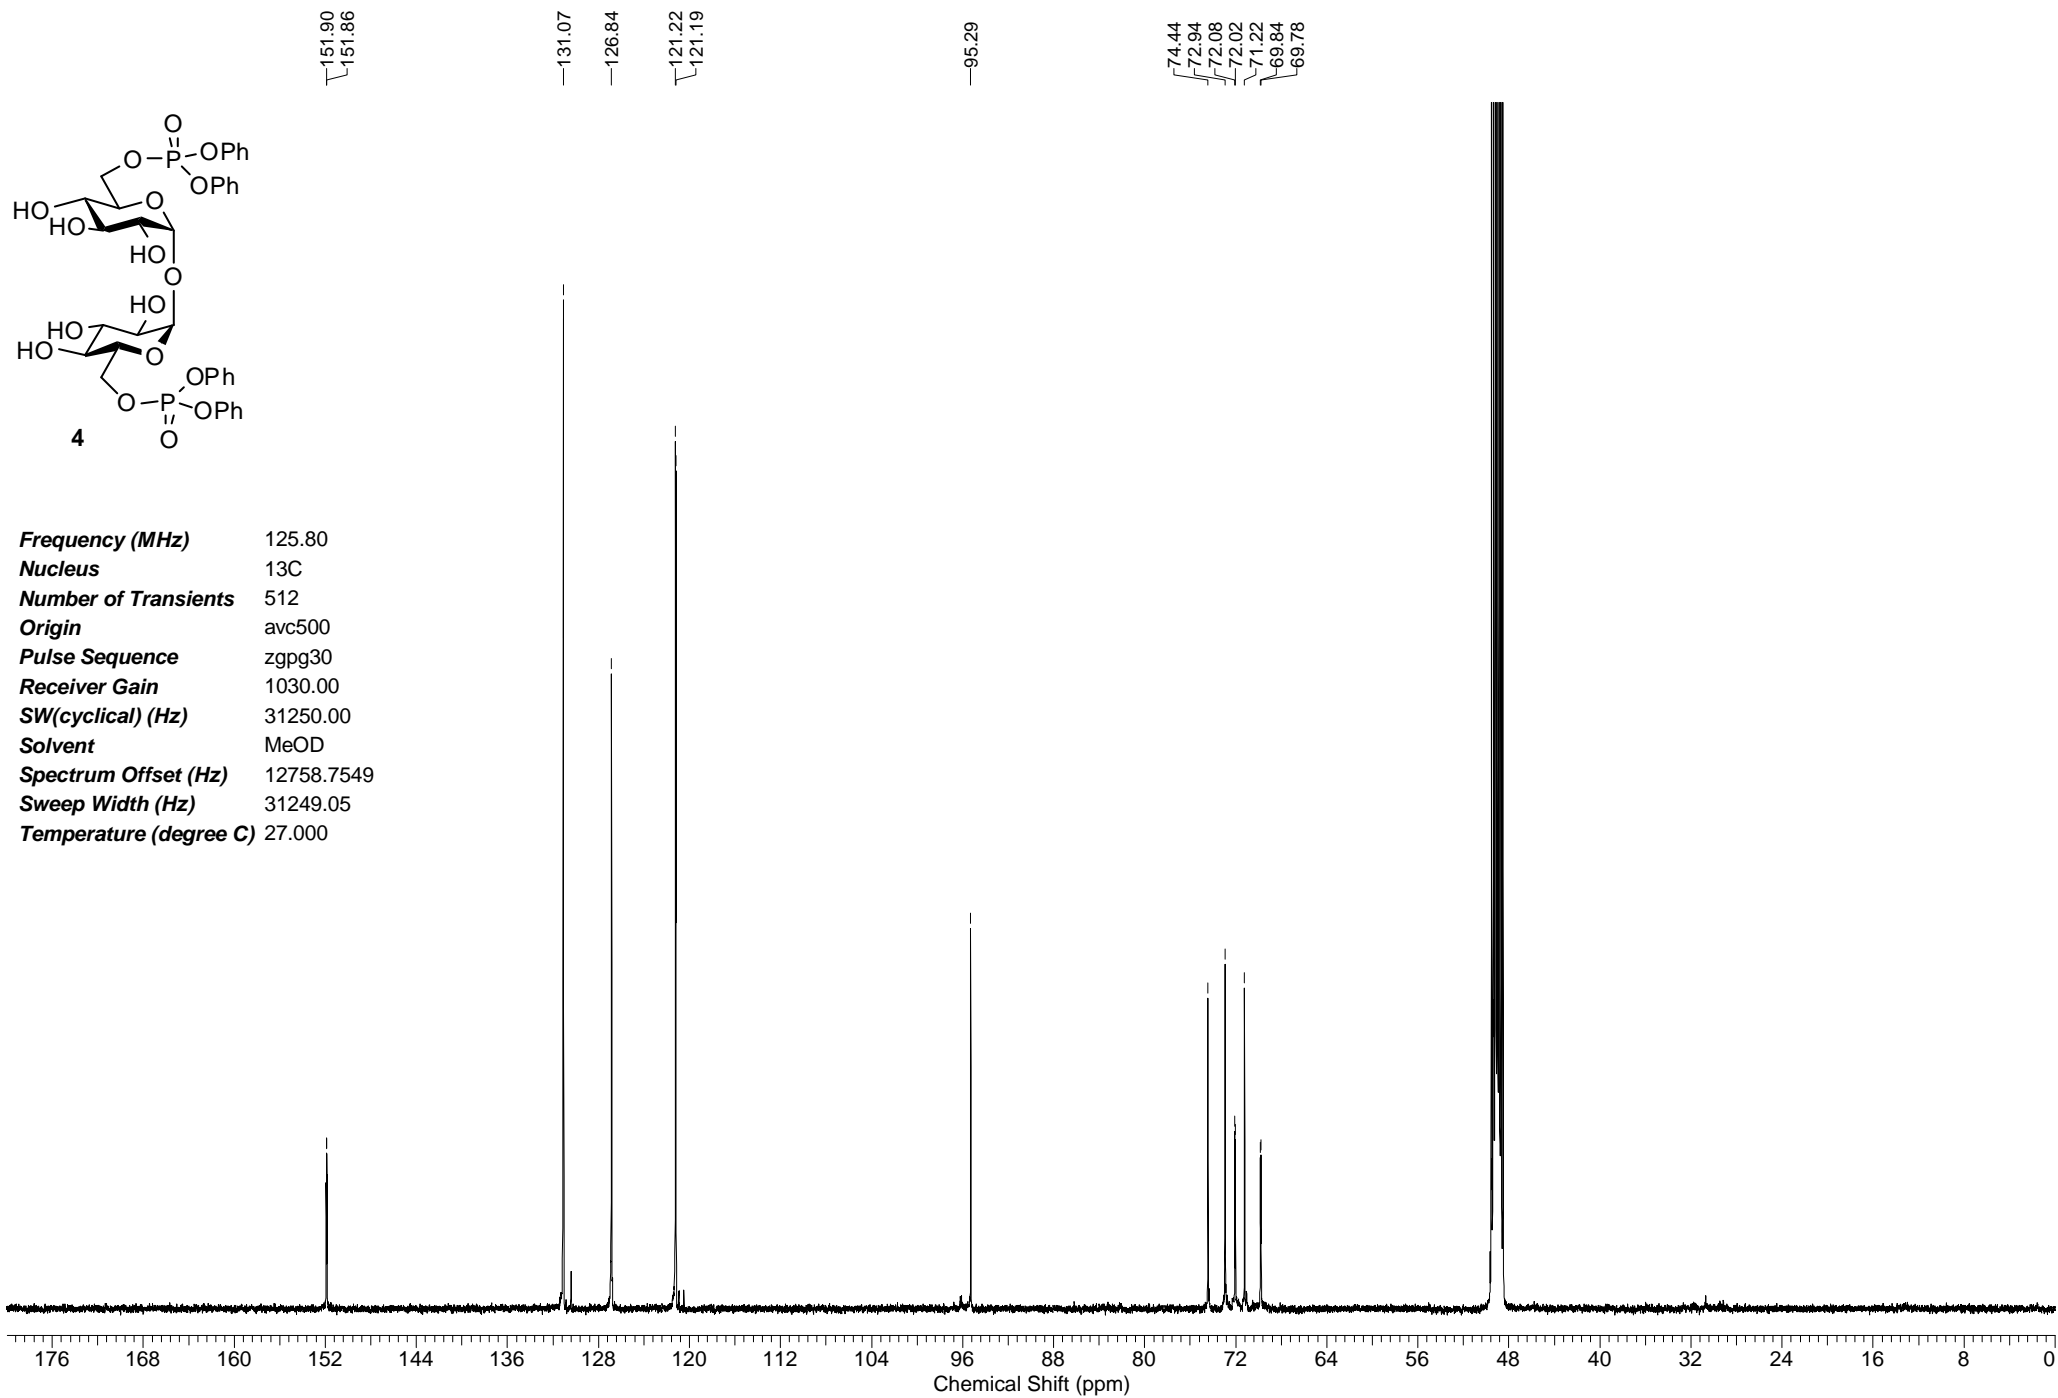

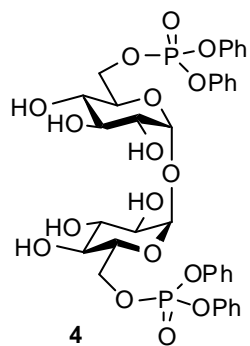

**Frequency (MHz)** 162.00  
**Nucleus** 31P  
**Number of Transients** 32  
**Origin** av400  
**Pulse Sequence** zgpg30  
**Receiver Gain** 20642.50  
**SW(cyclical) (Hz)** 64935.07  
**Solvent** MeOD  
**Spectrum Offset (Hz)** -8099.8774  
**Sweep Width (Hz)** 64933.09  
**Temperature (degree C)** 27.000

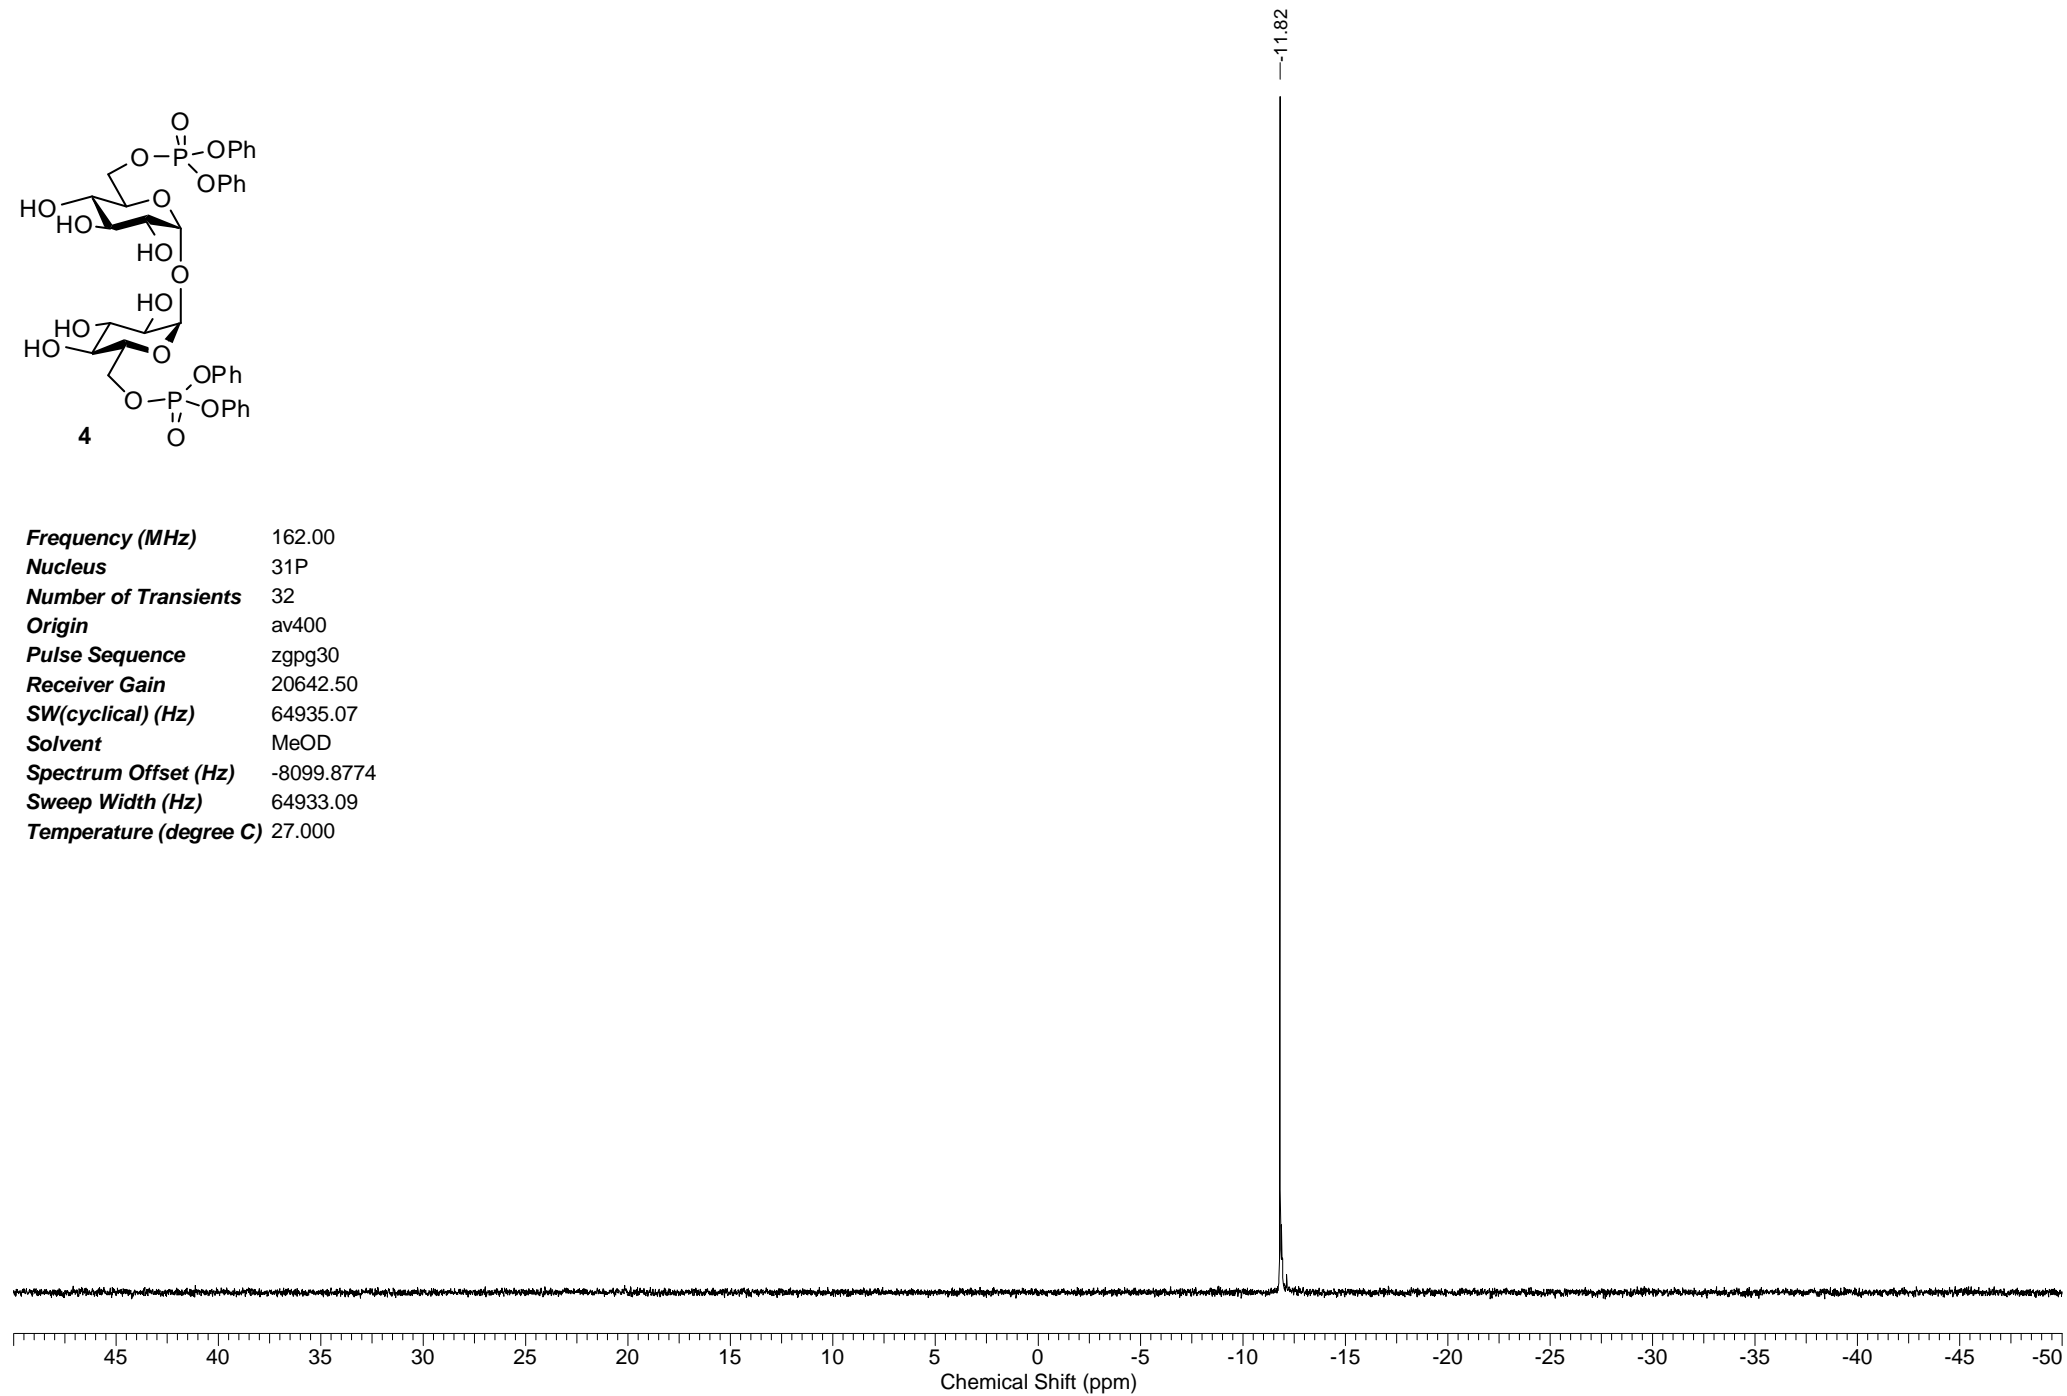

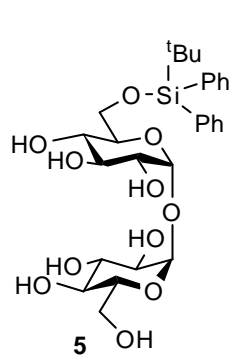

**Frequency (MHz)** 500.30  
**Nucleus** <sup>1</sup>H  
**Number of Transients** 16  
**Origin** avc500  
**Pulse Sequence** zg30  
**Receiver Gain** 4.00  
**SW(cyclical) (Hz)** 10330.58  
**Solvent** DMSO-d<sub>6</sub>  
**Spectrum Offset (Hz)** 3089.5557  
**Sweep Width (Hz)** 10330.26  
**Temperature (degree C)** 24.970

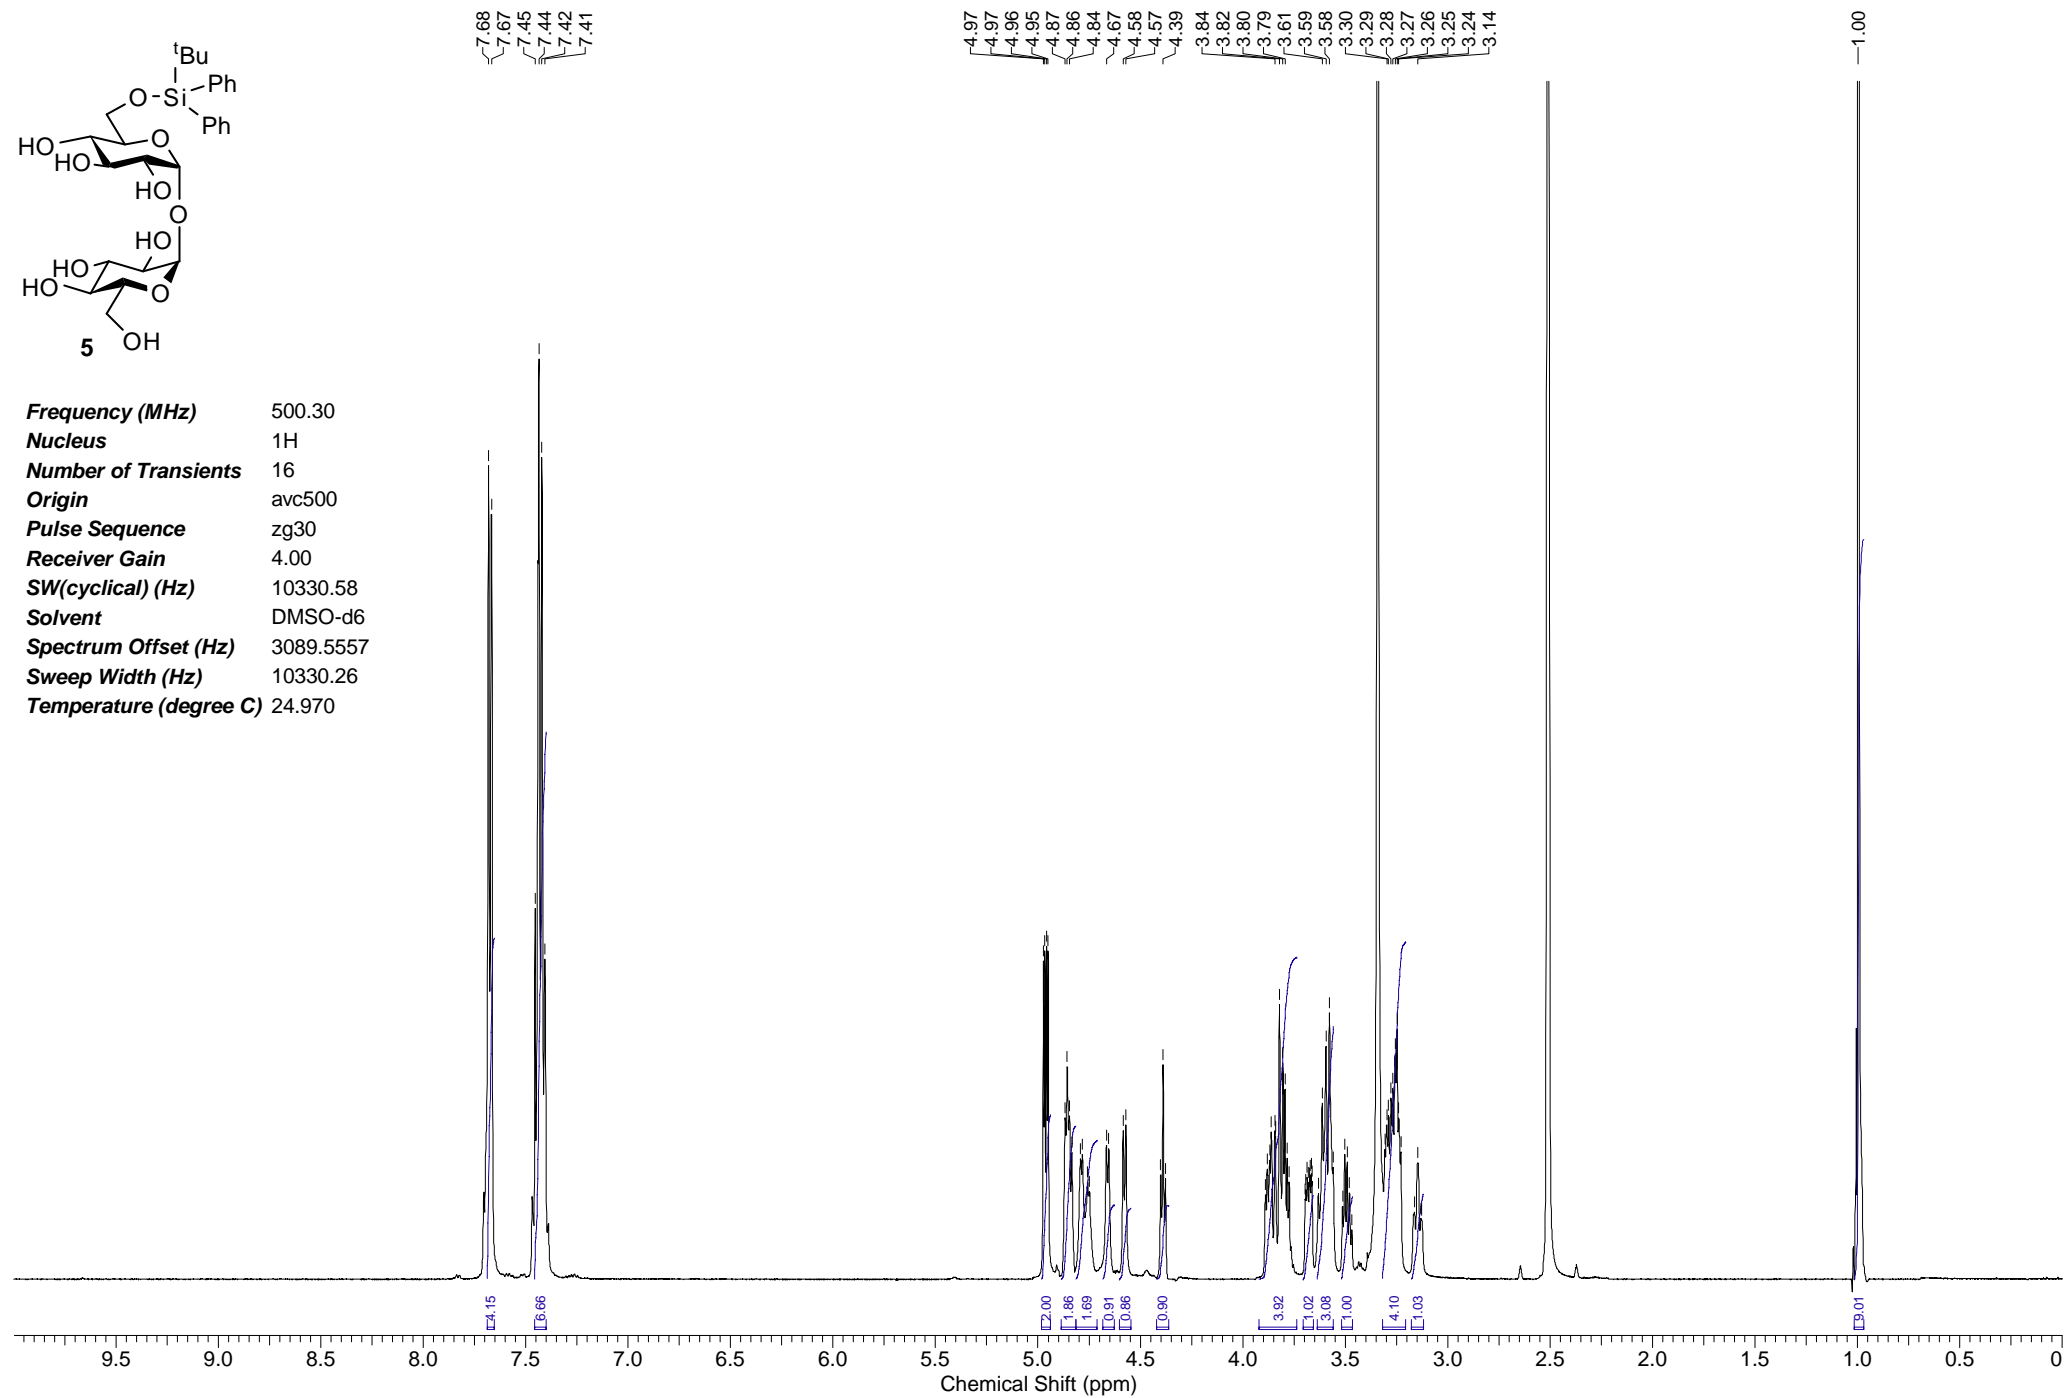



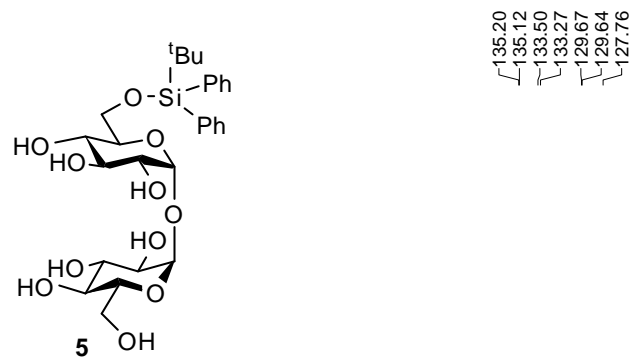

135.20  
135.12  
133.50  
133.27  
129.67  
129.64  
127.76

93.07  
92.97

73.01  
72.51  
72.27  
71.69  
71.60  
70.10  
69.91  
63.40  
60.73

26.61

18.96

**Frequency (MHz)** 125.80  
**Nucleus** 13C  
**Number of Transients** 1024  
**Origin** avc500  
**Pulse Sequence** zgpg30  
**Receiver Gain** 1820.00  
**SW(cyclical) (Hz)** 31250.00  
**Solvent** DMSO-d6  
**Spectrum Offset (Hz)** 12519.7266  
**Sweep Width (Hz)** 31249.05  
**Temperature (degree C)** 24.970

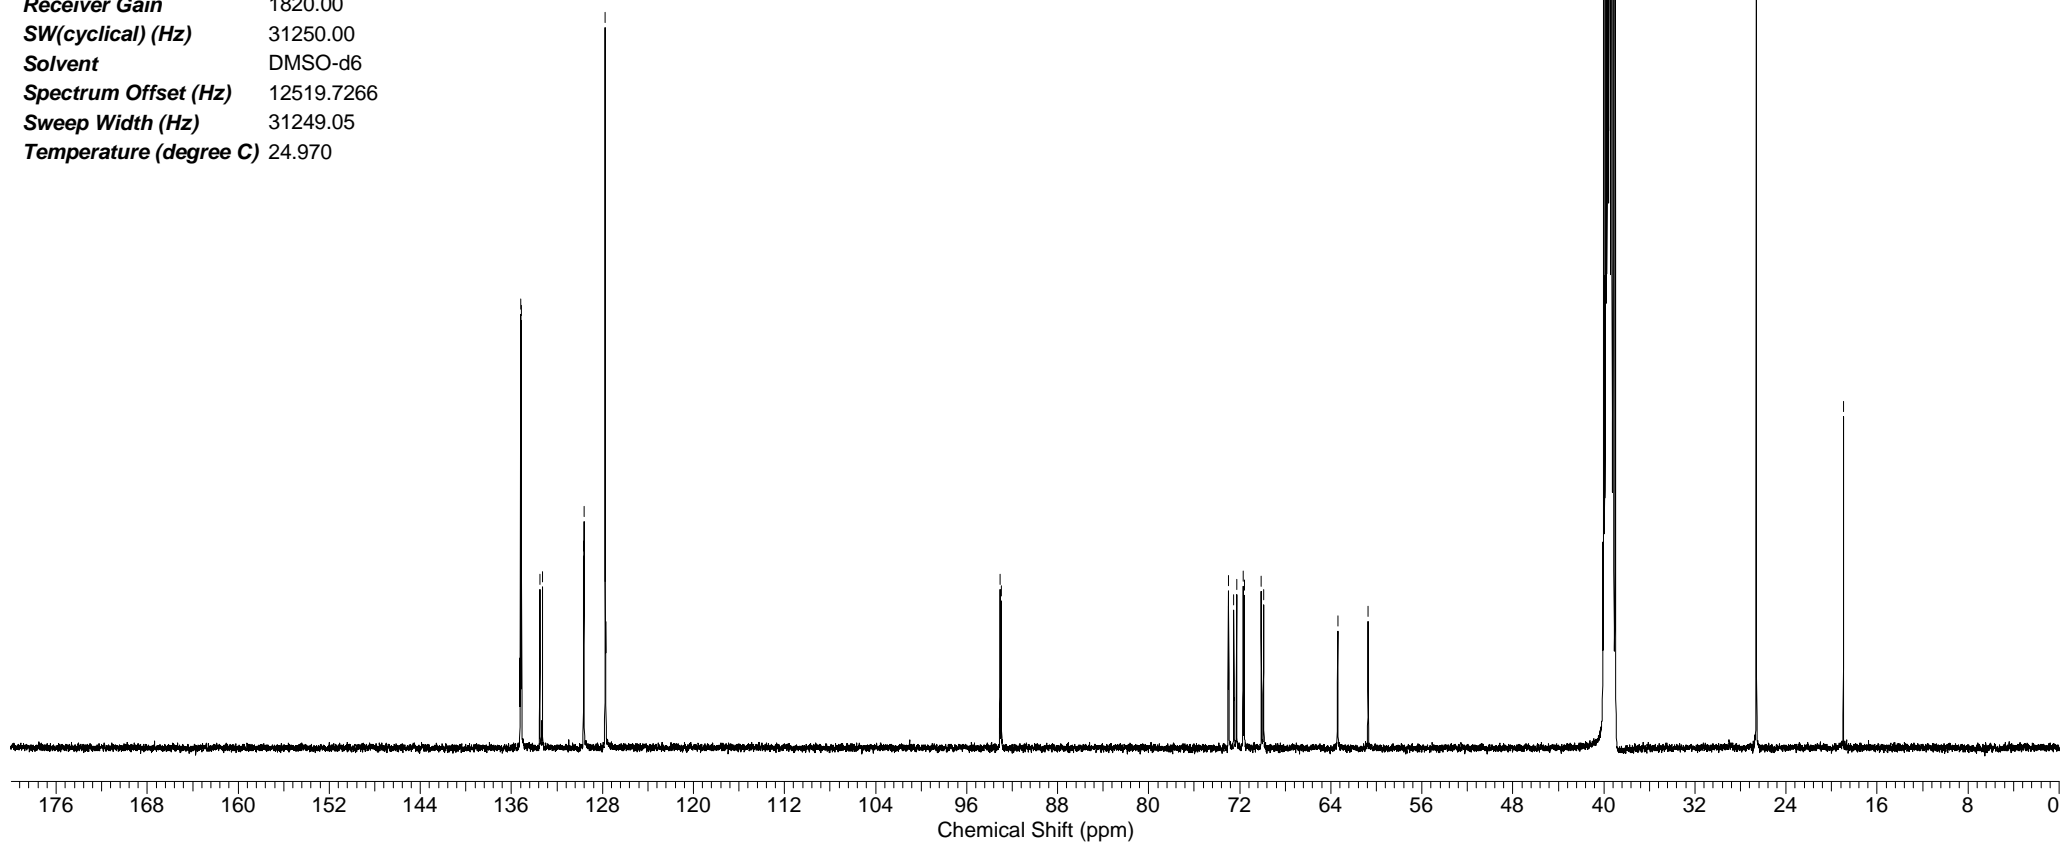

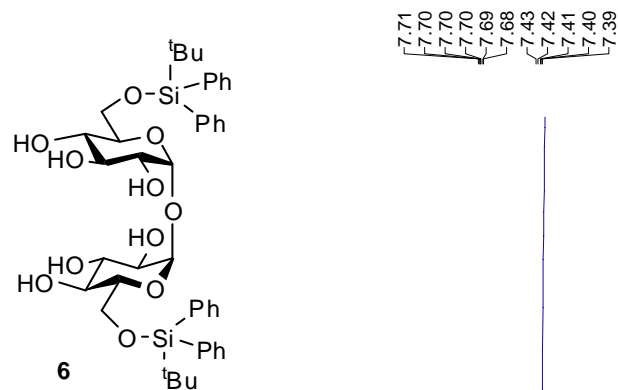

Frequency (MHz) 500.30  
Nucleus 1H  
Number of Transients 16  
Origin avc500  
Pulse Sequence zg30  
Receiver Gain 4.00  
SW(cyclical) (Hz) 10330.58  
Solvent DMSO-d6  
Spectrum Offset (Hz) 3089.5557  
Sweep Width (Hz) 10330.26  
Temperature (degree C) 24.970

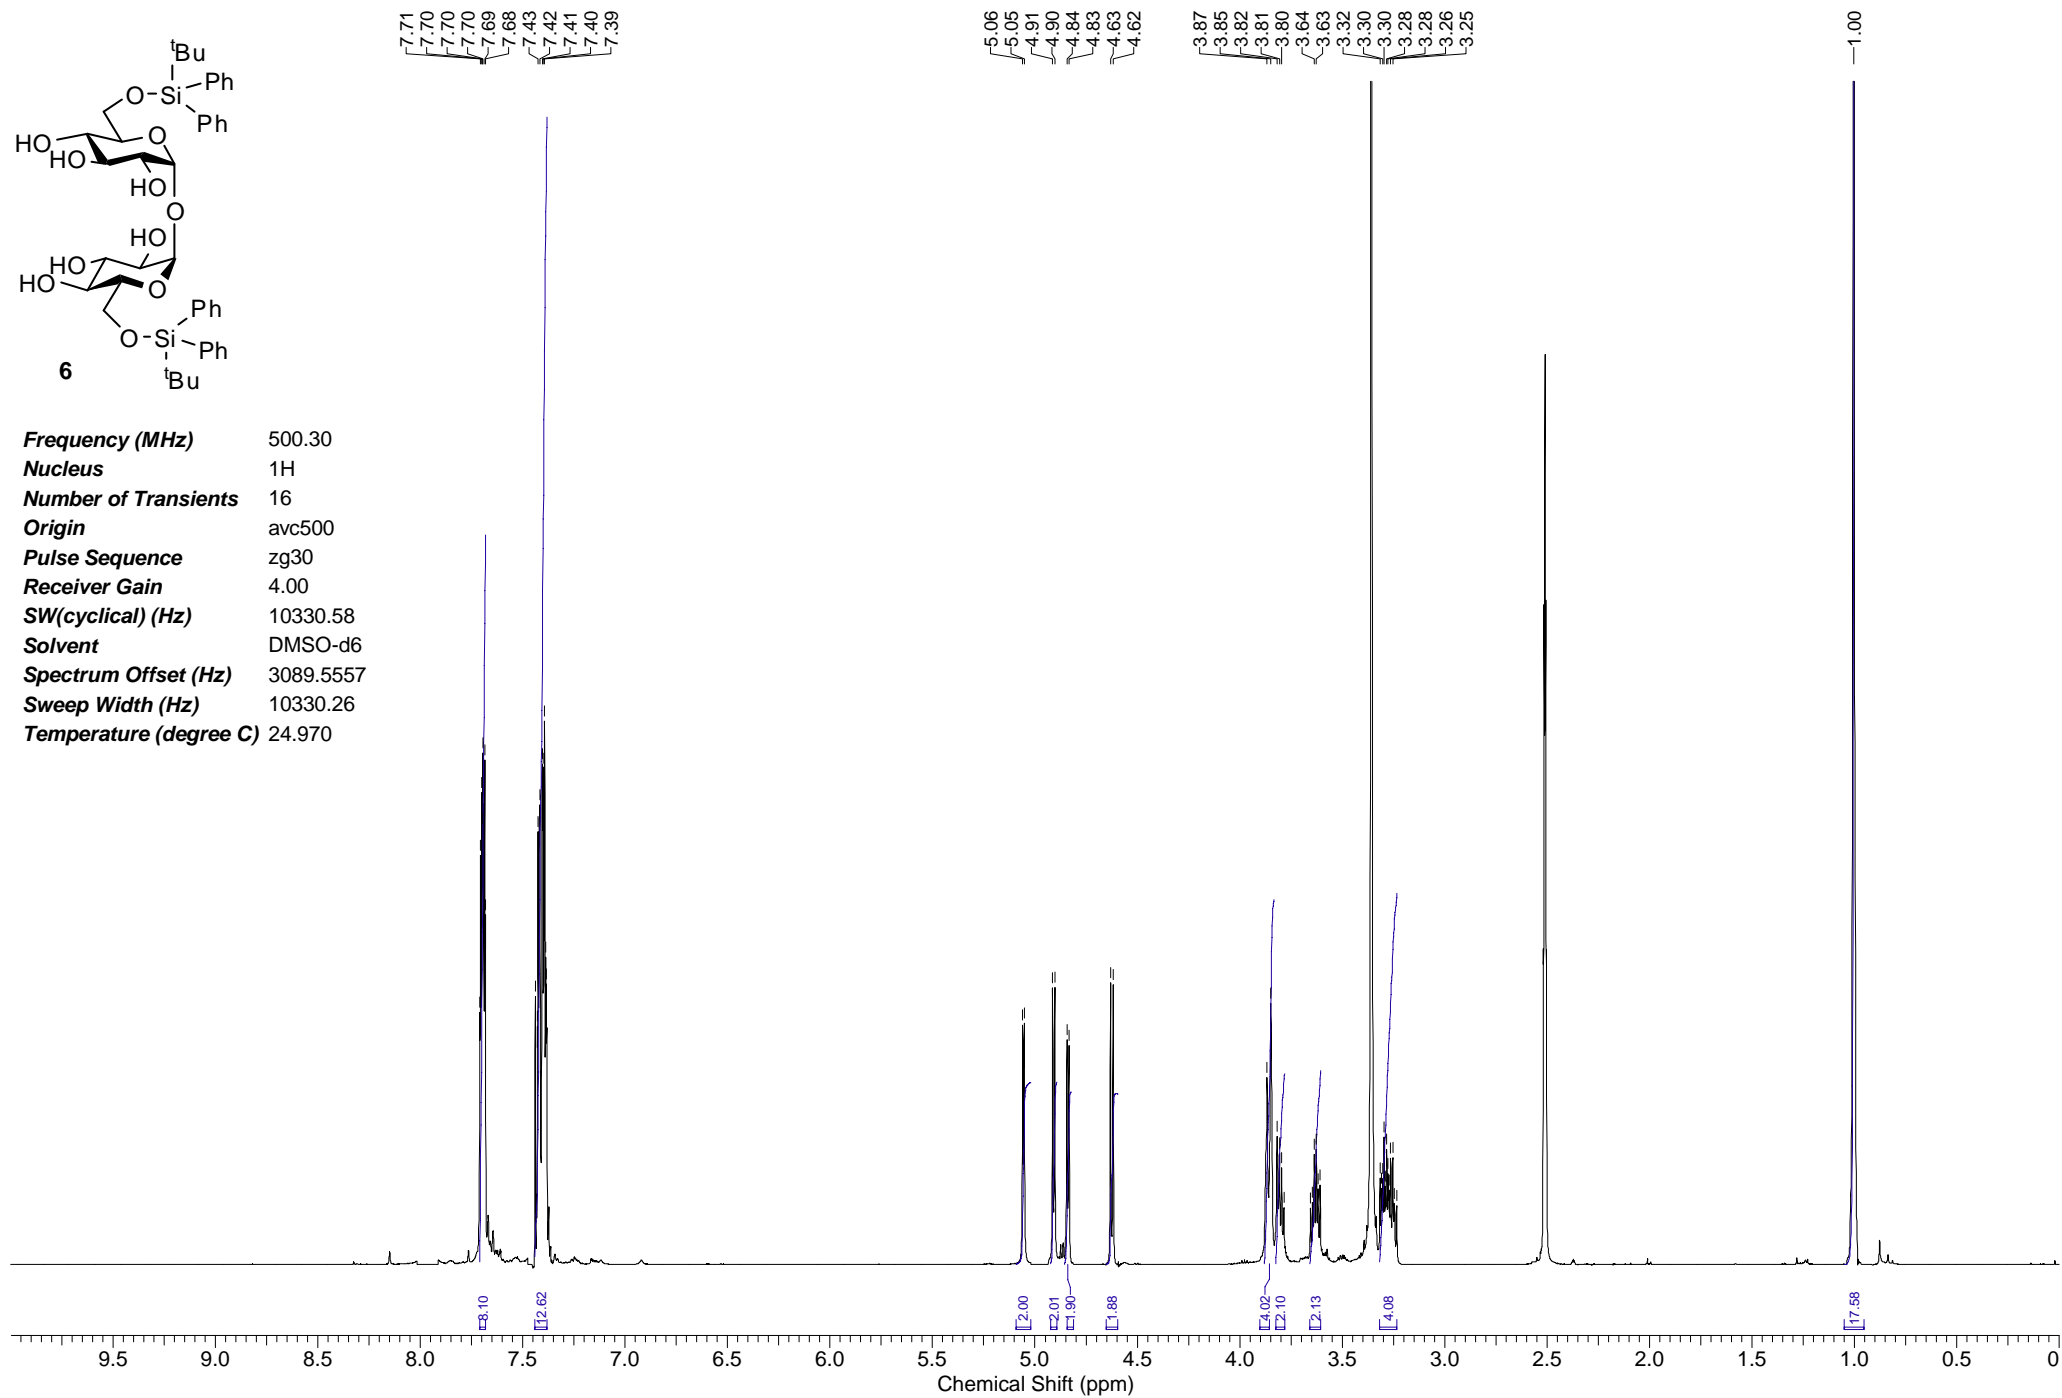

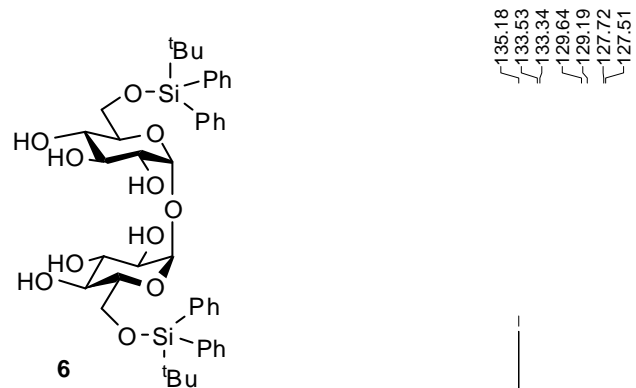

**Frequency (MHz)** 125.81  
**Nucleus** 13C  
**Number of Transients** 256  
**Origin** avc500  
**Pulse Sequence** zgpg30  
**Receiver Gain** 1150.00  
**SW(cyclical) (Hz)** 31250.00  
**Solvent** DMSO-d6  
**Spectrum Offset (Hz)** 12522.5273  
**Sweep Width (Hz)** 31249.05  
**Temperature (degree C)** 24.970

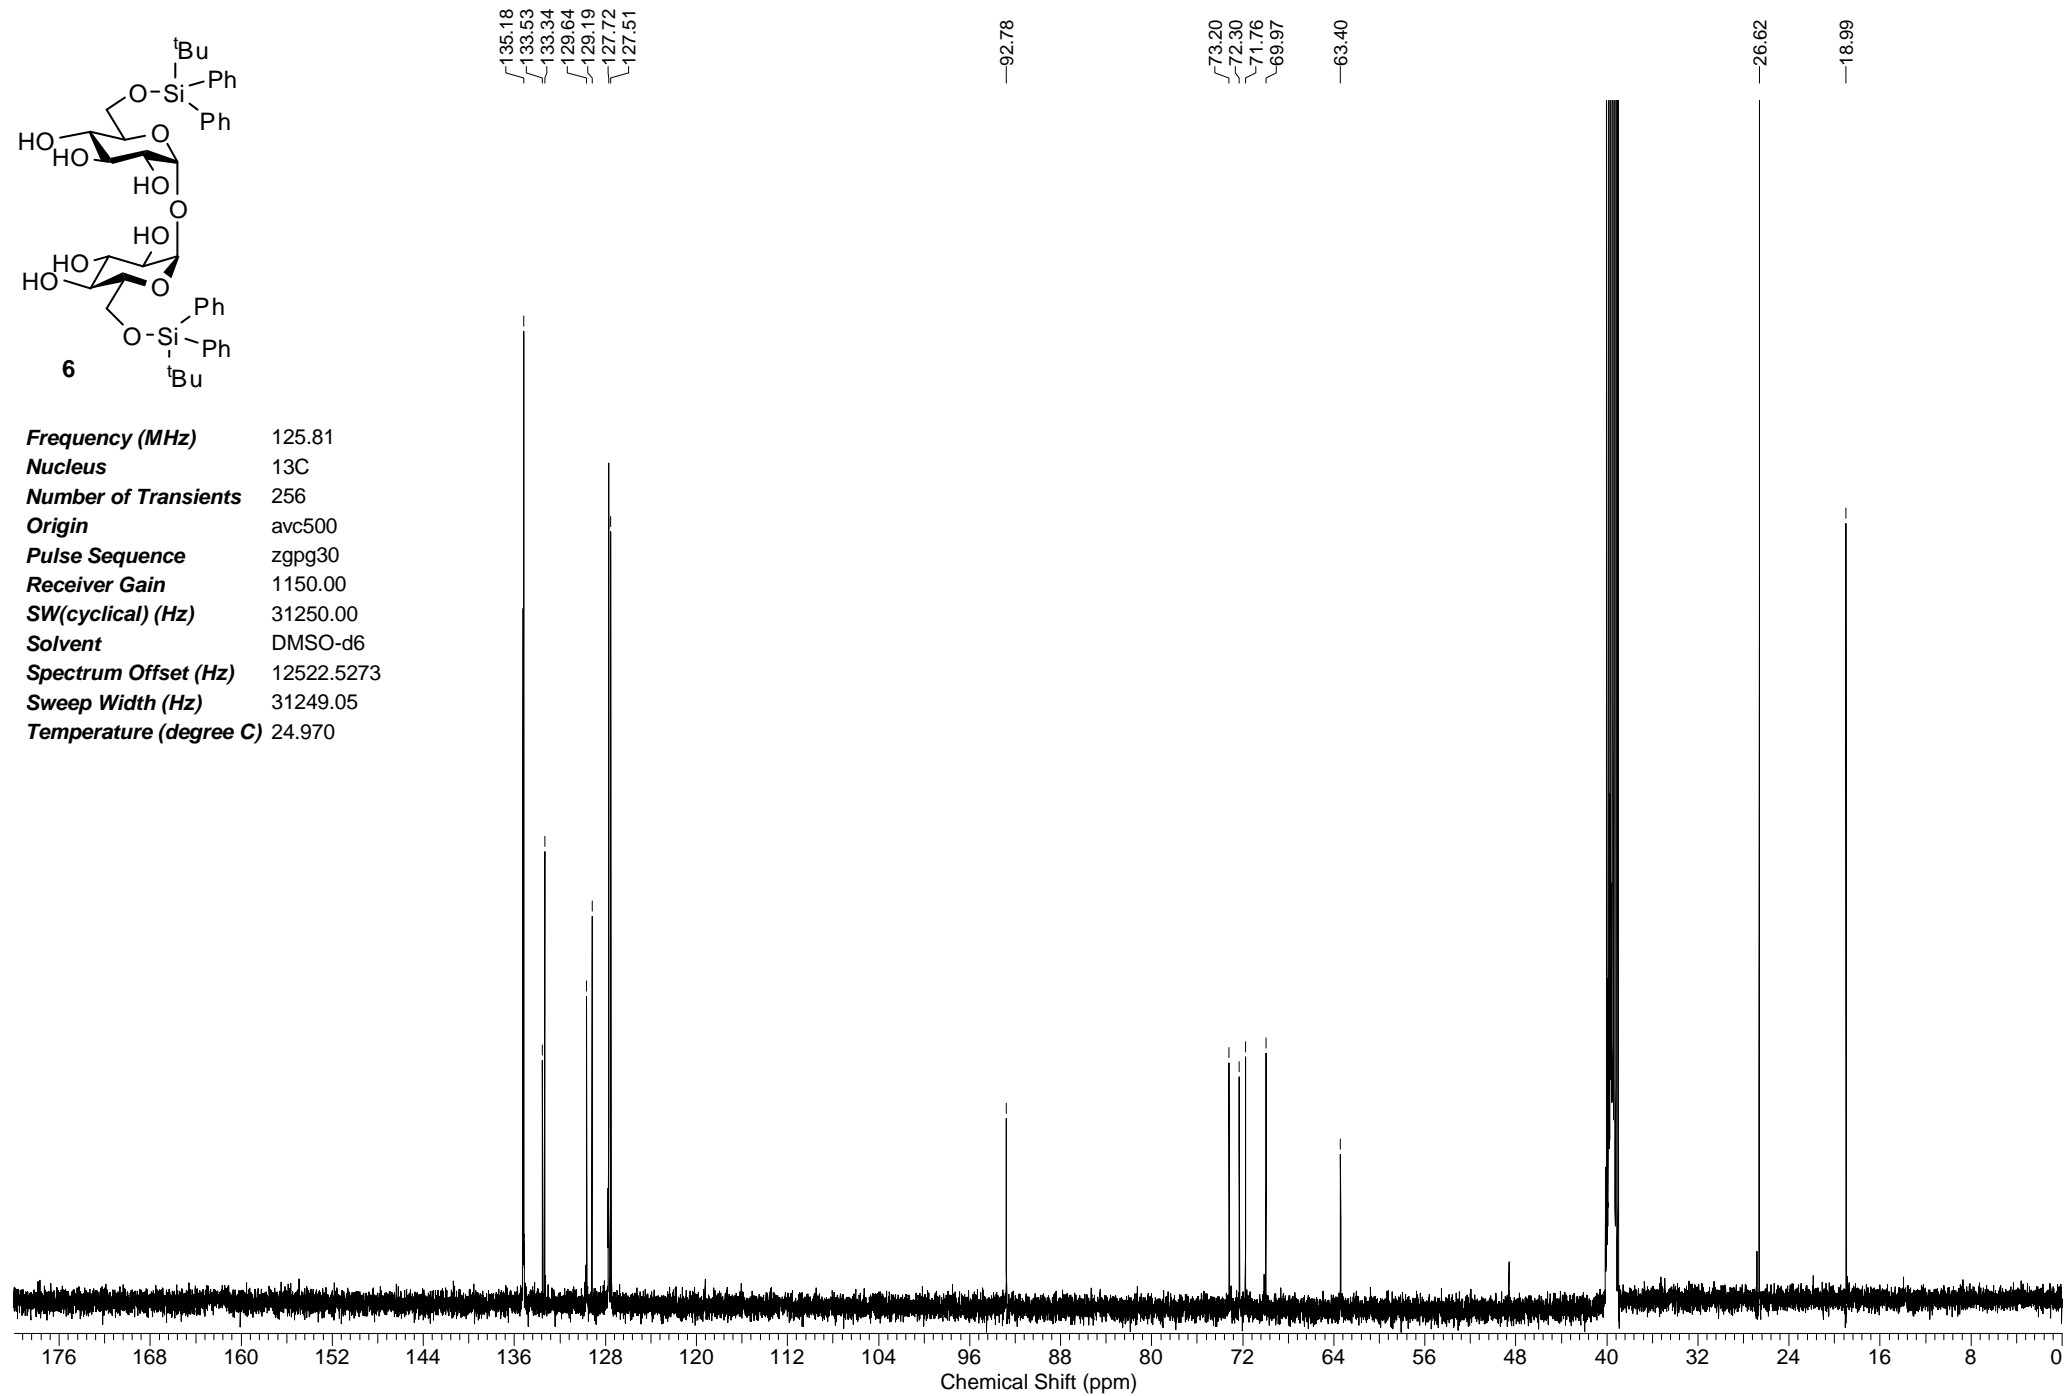

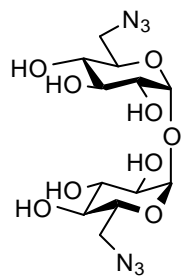

8

**Frequency (MHz)** 500.30  
**Nucleus** 1H  
**Number of Transients** 16  
**Origin** avc500  
**Pulse Sequence** zg30  
**Receiver Gain** 4.00  
**SW(cyclical) (Hz)** 10330.58  
**Solvent** DEUTERIUM OXIDE  
**Spectrum Offset (Hz)** 3089.5557  
**Sweep Width (Hz)** 10330.26  
**Temperature (degree C)** 24.970

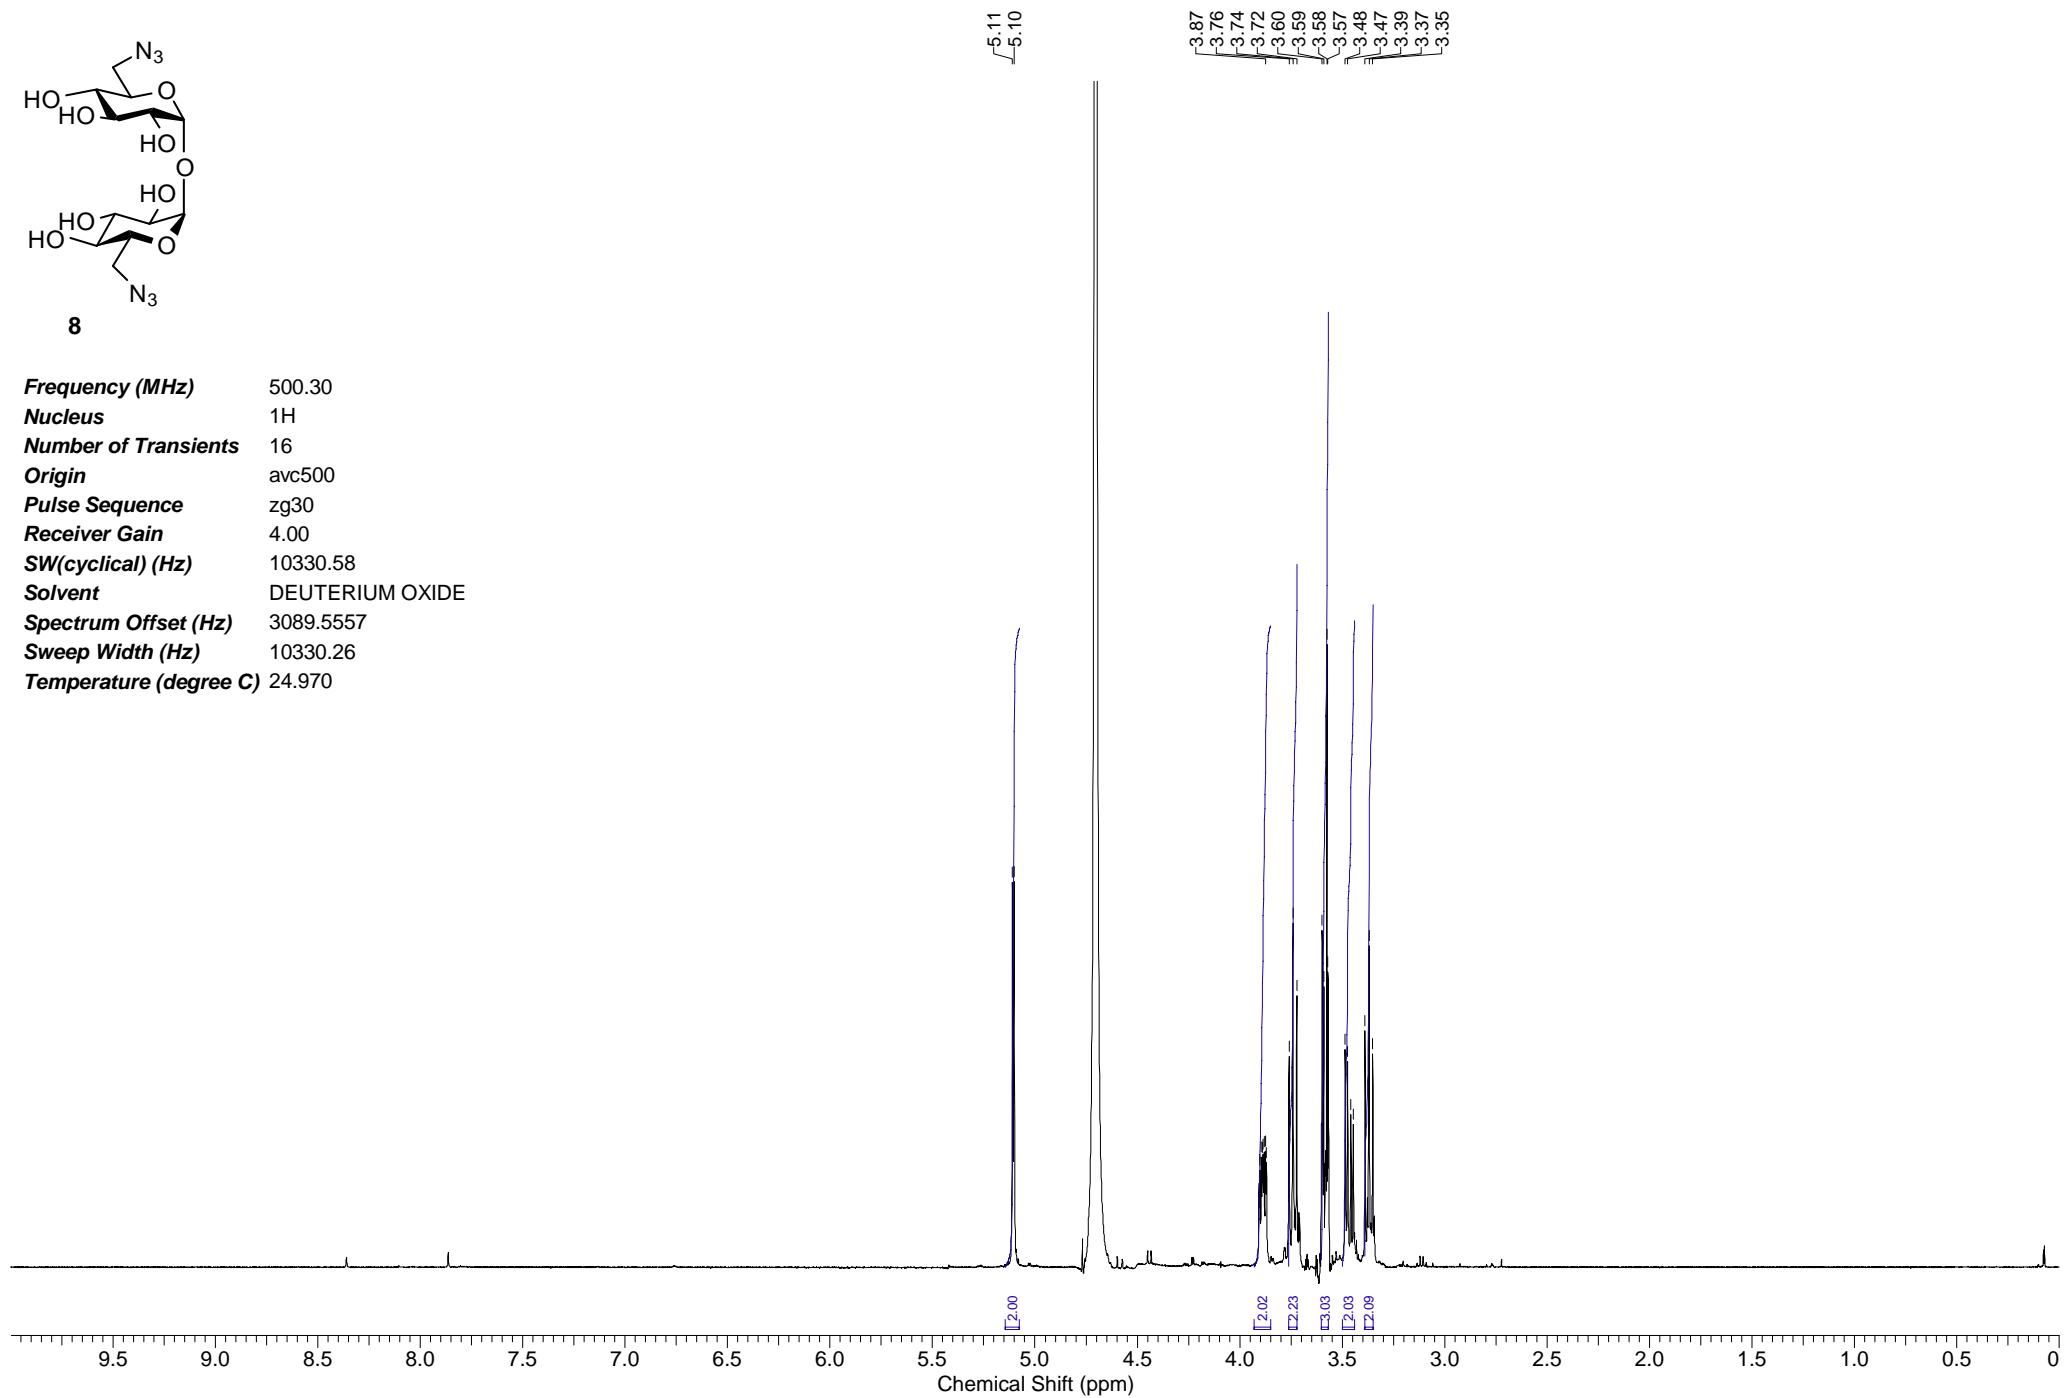



8

**Frequency (MHz)** 125.80  
**Nucleus**  $^{13}\text{C}$   
**Number of Transients** 512  
**Origin** avc500  
**Pulse Sequence** zgpg30  
**Receiver Gain** 1290.00  
**SW(cyclical) (Hz)** 31250.00  
**Solvent** DEUTERIUM OXIDE  
**Spectrum Offset (Hz)** 12580.1094  
**Sweep Width (Hz)** 31249.05  
**Temperature (degree C)** 24.970

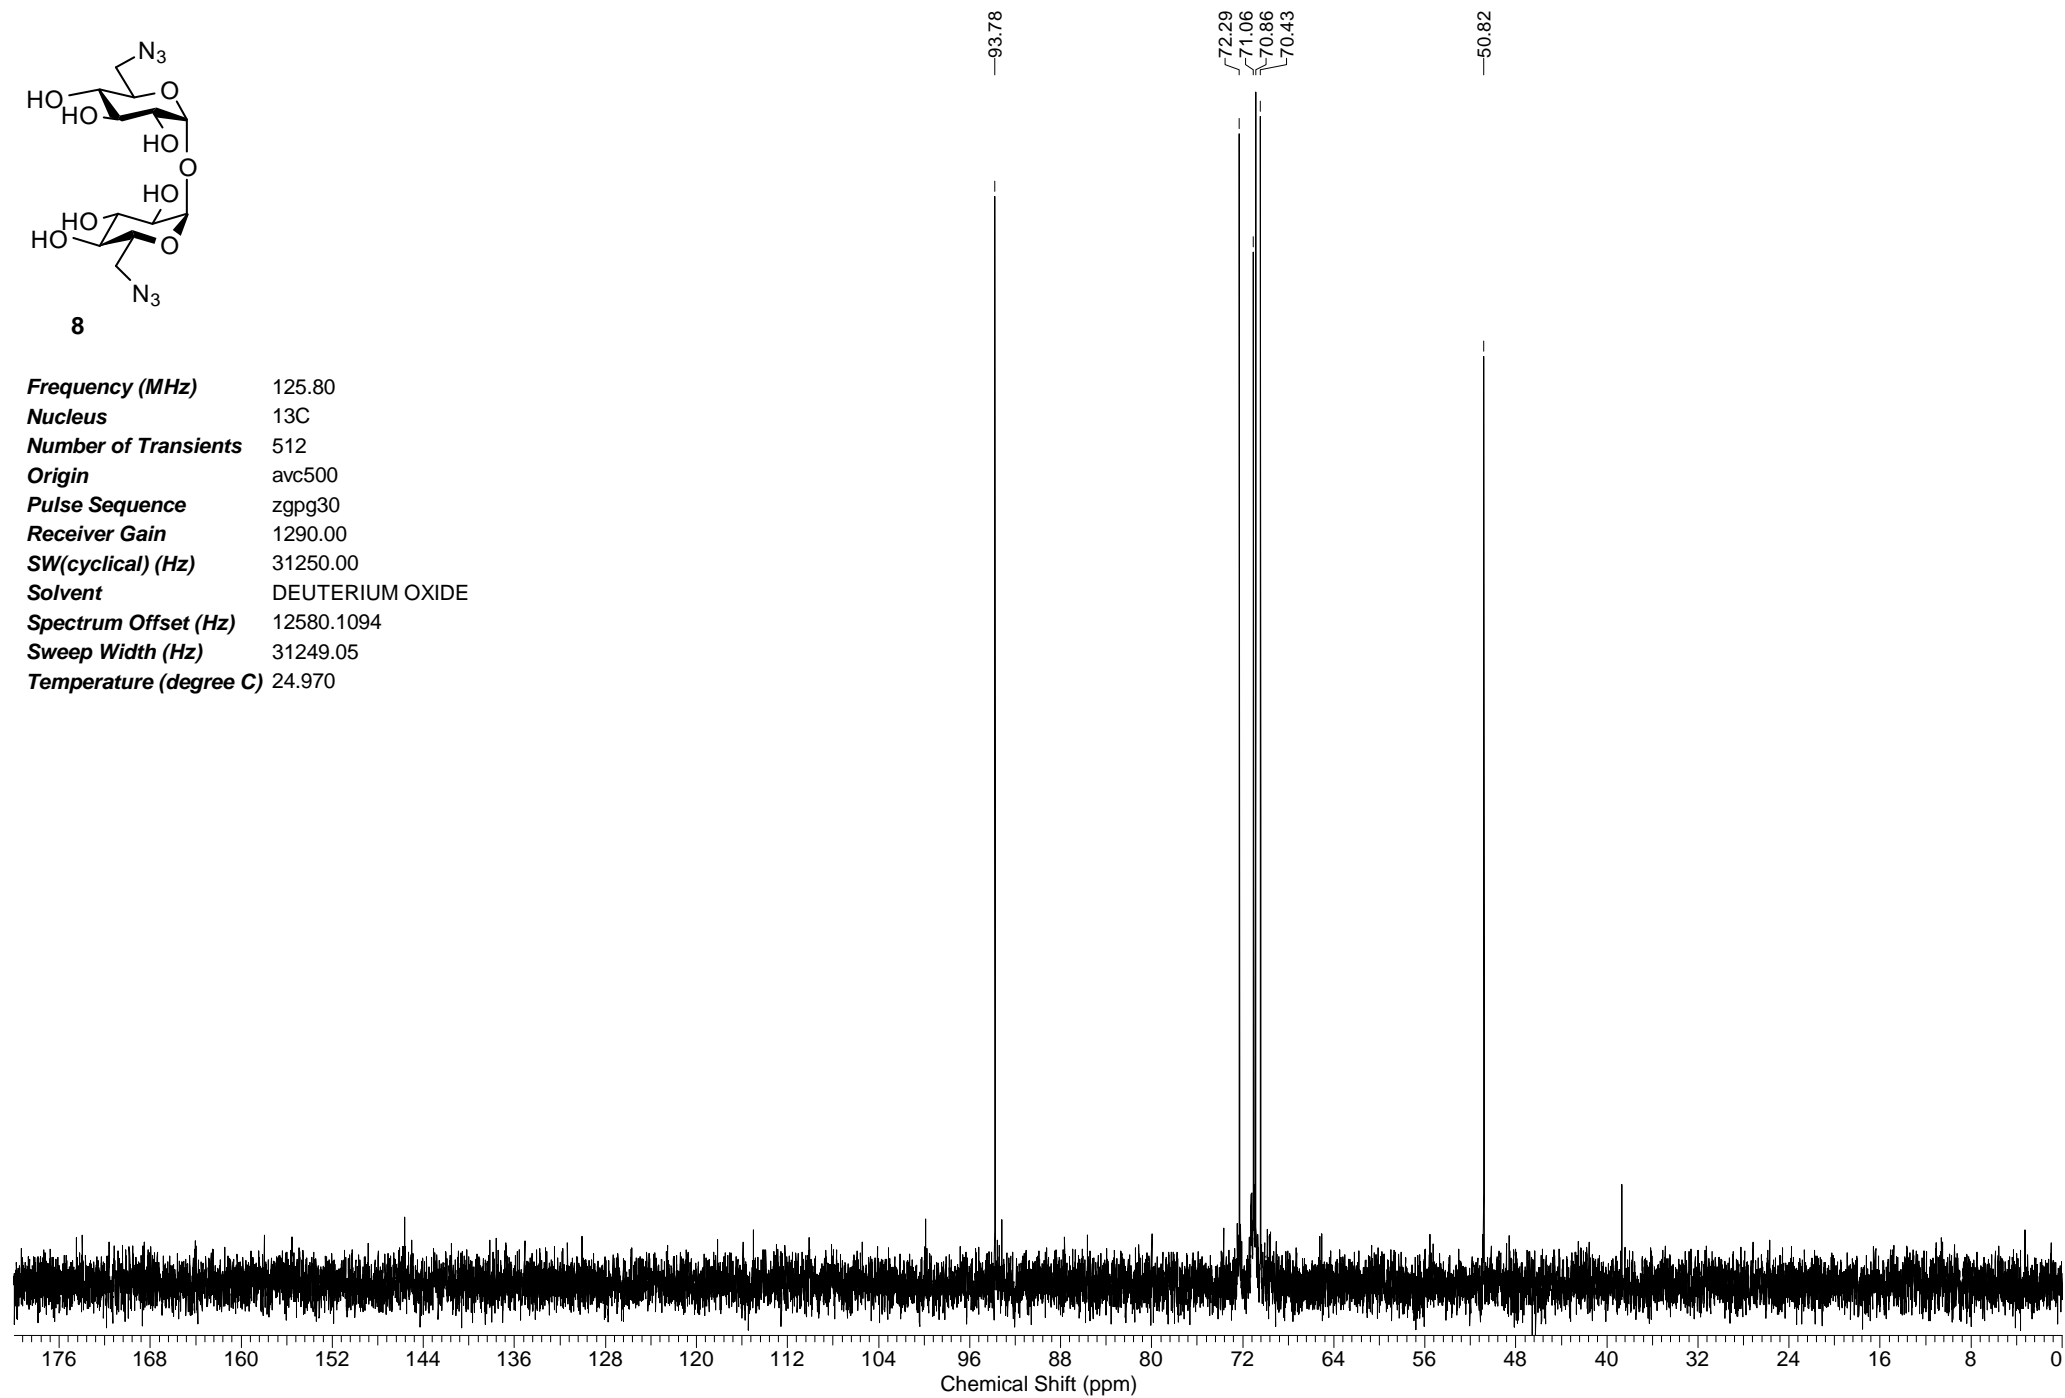

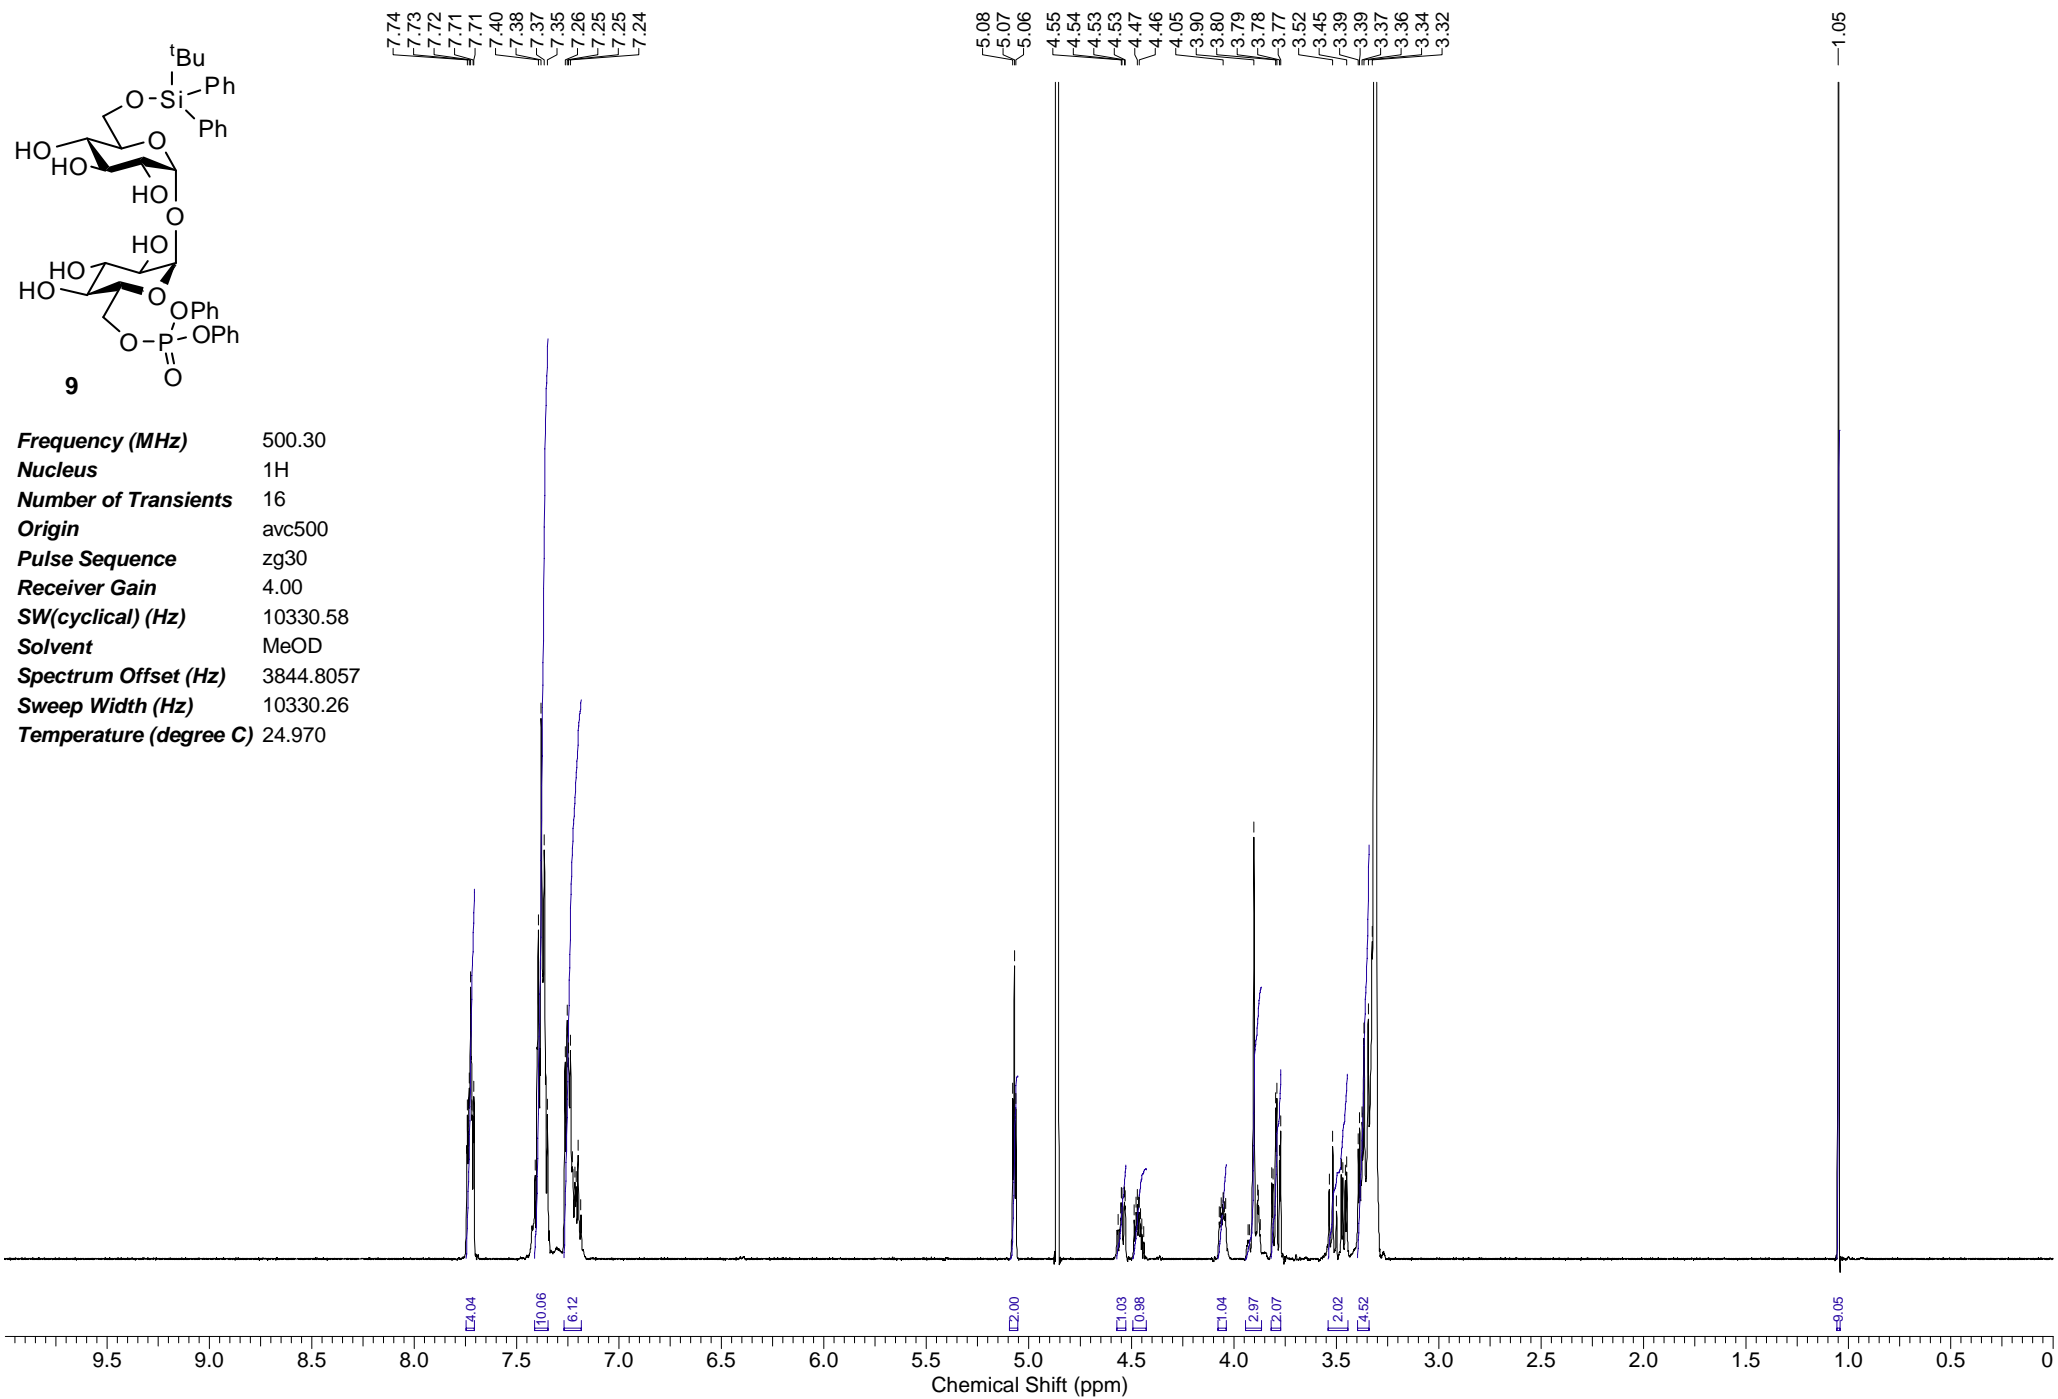

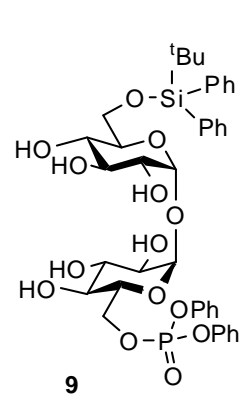

**Frequency (MHz)** 125.80  
**Nucleus** 13C  
**Number of Transients** 1024  
**Origin** avc500  
**Pulse Sequence** zgpg30  
**Receiver Gain** 1030.00  
**SW(cyclical) (Hz)** 31250.00  
**Solvent** MeOD  
**Spectrum Offset (Hz)** 12758.7549  
**Sweep Width (Hz)** 31249.05  
**Temperature (degree C)** 24.970

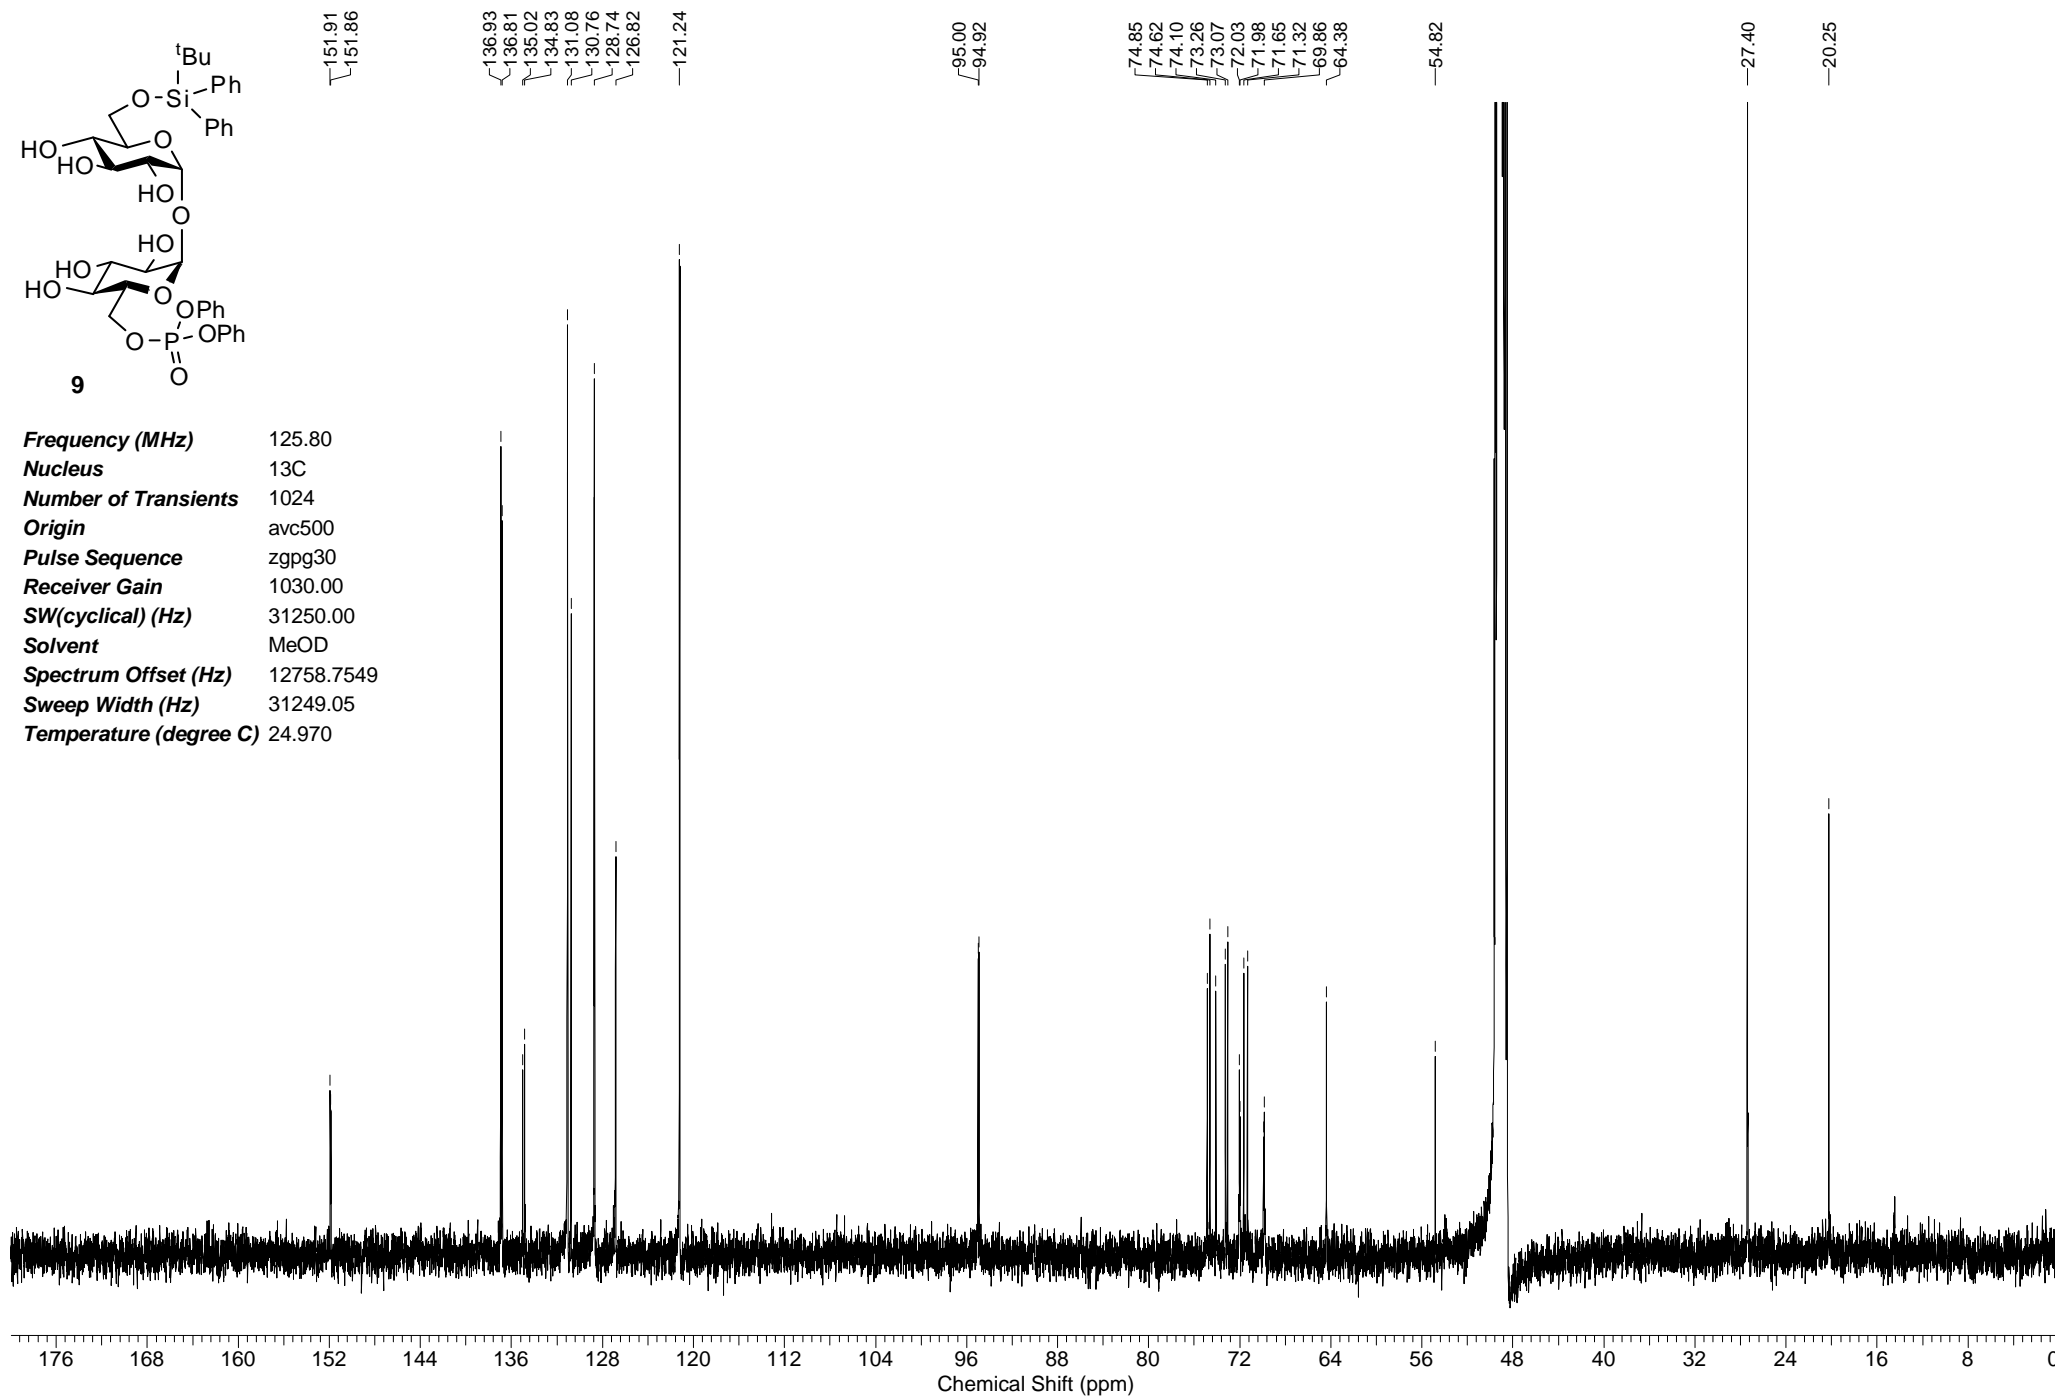

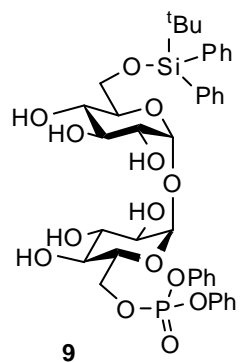

**Frequency (MHz)** 162.00  
**Nucleus** 31P  
**Number of Transients** 32  
**Origin** av400  
**Pulse Sequence** zgpg30  
**Receiver Gain** 23170.50  
**SW(cyclical) (Hz)** 64935.07  
**Solvent** MeOD  
**Spectrum Offset (Hz)** -9296.6221  
**Sweep Width (Hz)** 64933.09  
**Temperature (degree C)** 27.000

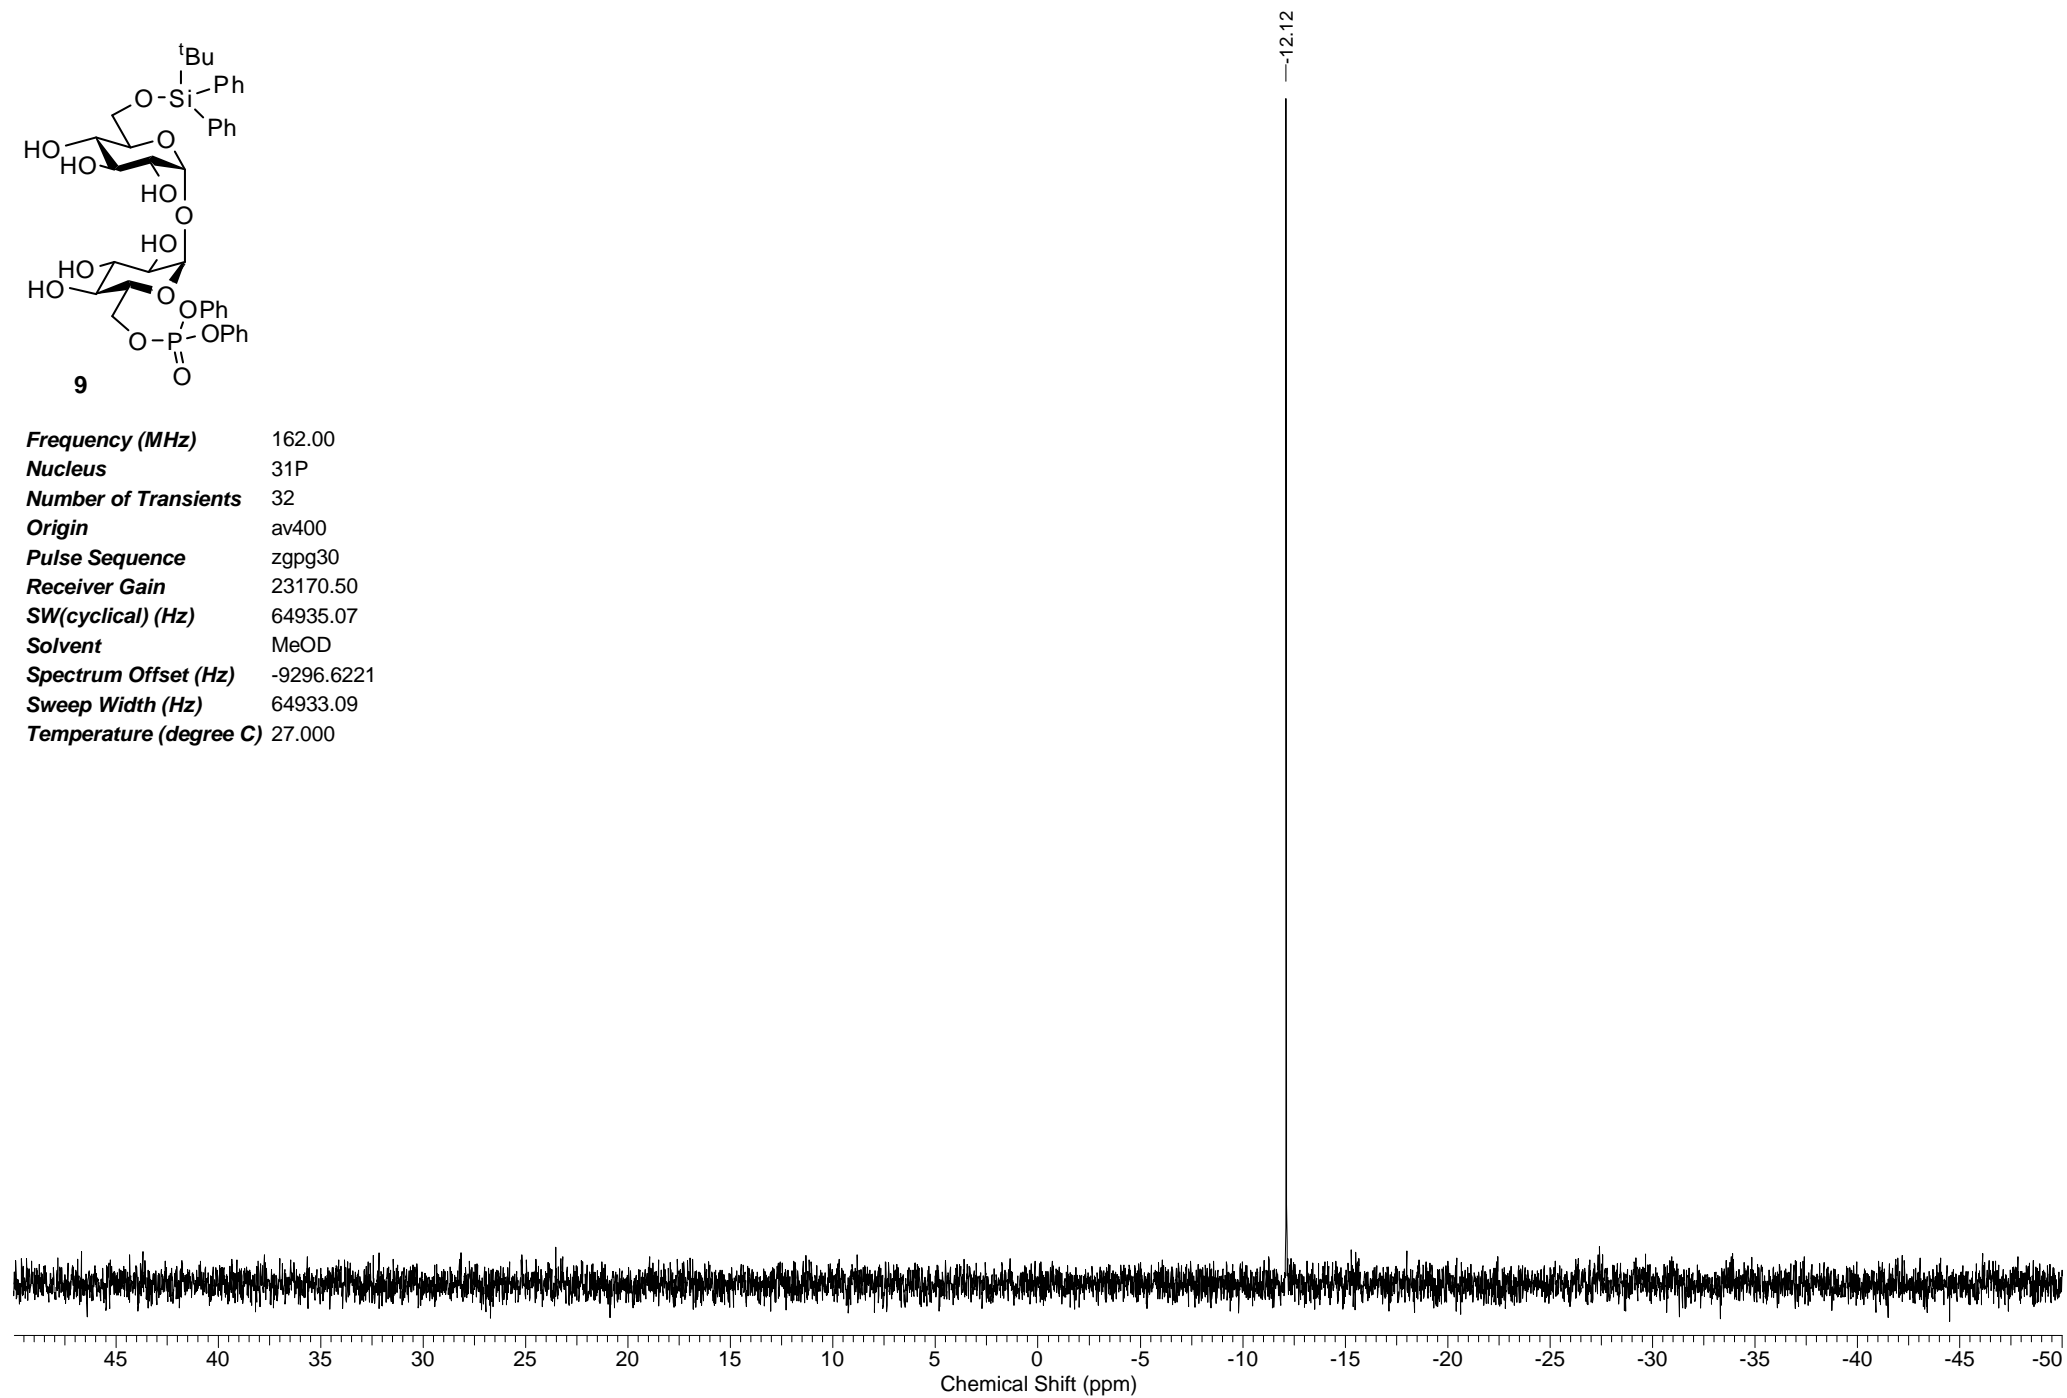



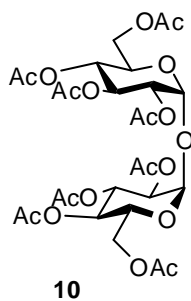

**Frequency (MHz)** 500.30  
**Nucleus** 1H  
**Number of Transients** 16  
**Origin** avc500  
**Pulse Sequence** zg30  
**Receiver Gain** 4.00  
**SW(cyclical) (Hz)** 10330.58  
**Solvent** CHLOROFORM-d  
**Spectrum Offset (Hz)** 3065.5417  
**Sweep Width (Hz)** 10330.26  
**Temperature (degree C)** 24.970

5.50  
5.48  
5.46  
5.28  
5.05  
5.04  
5.03  
5.02  
5.01  
4.24  
4.23  
4.22  
4.21  
4.05  
4.03  
4.01  
3.99  
3.98

2.07  
2.07  
2.04  
2.02

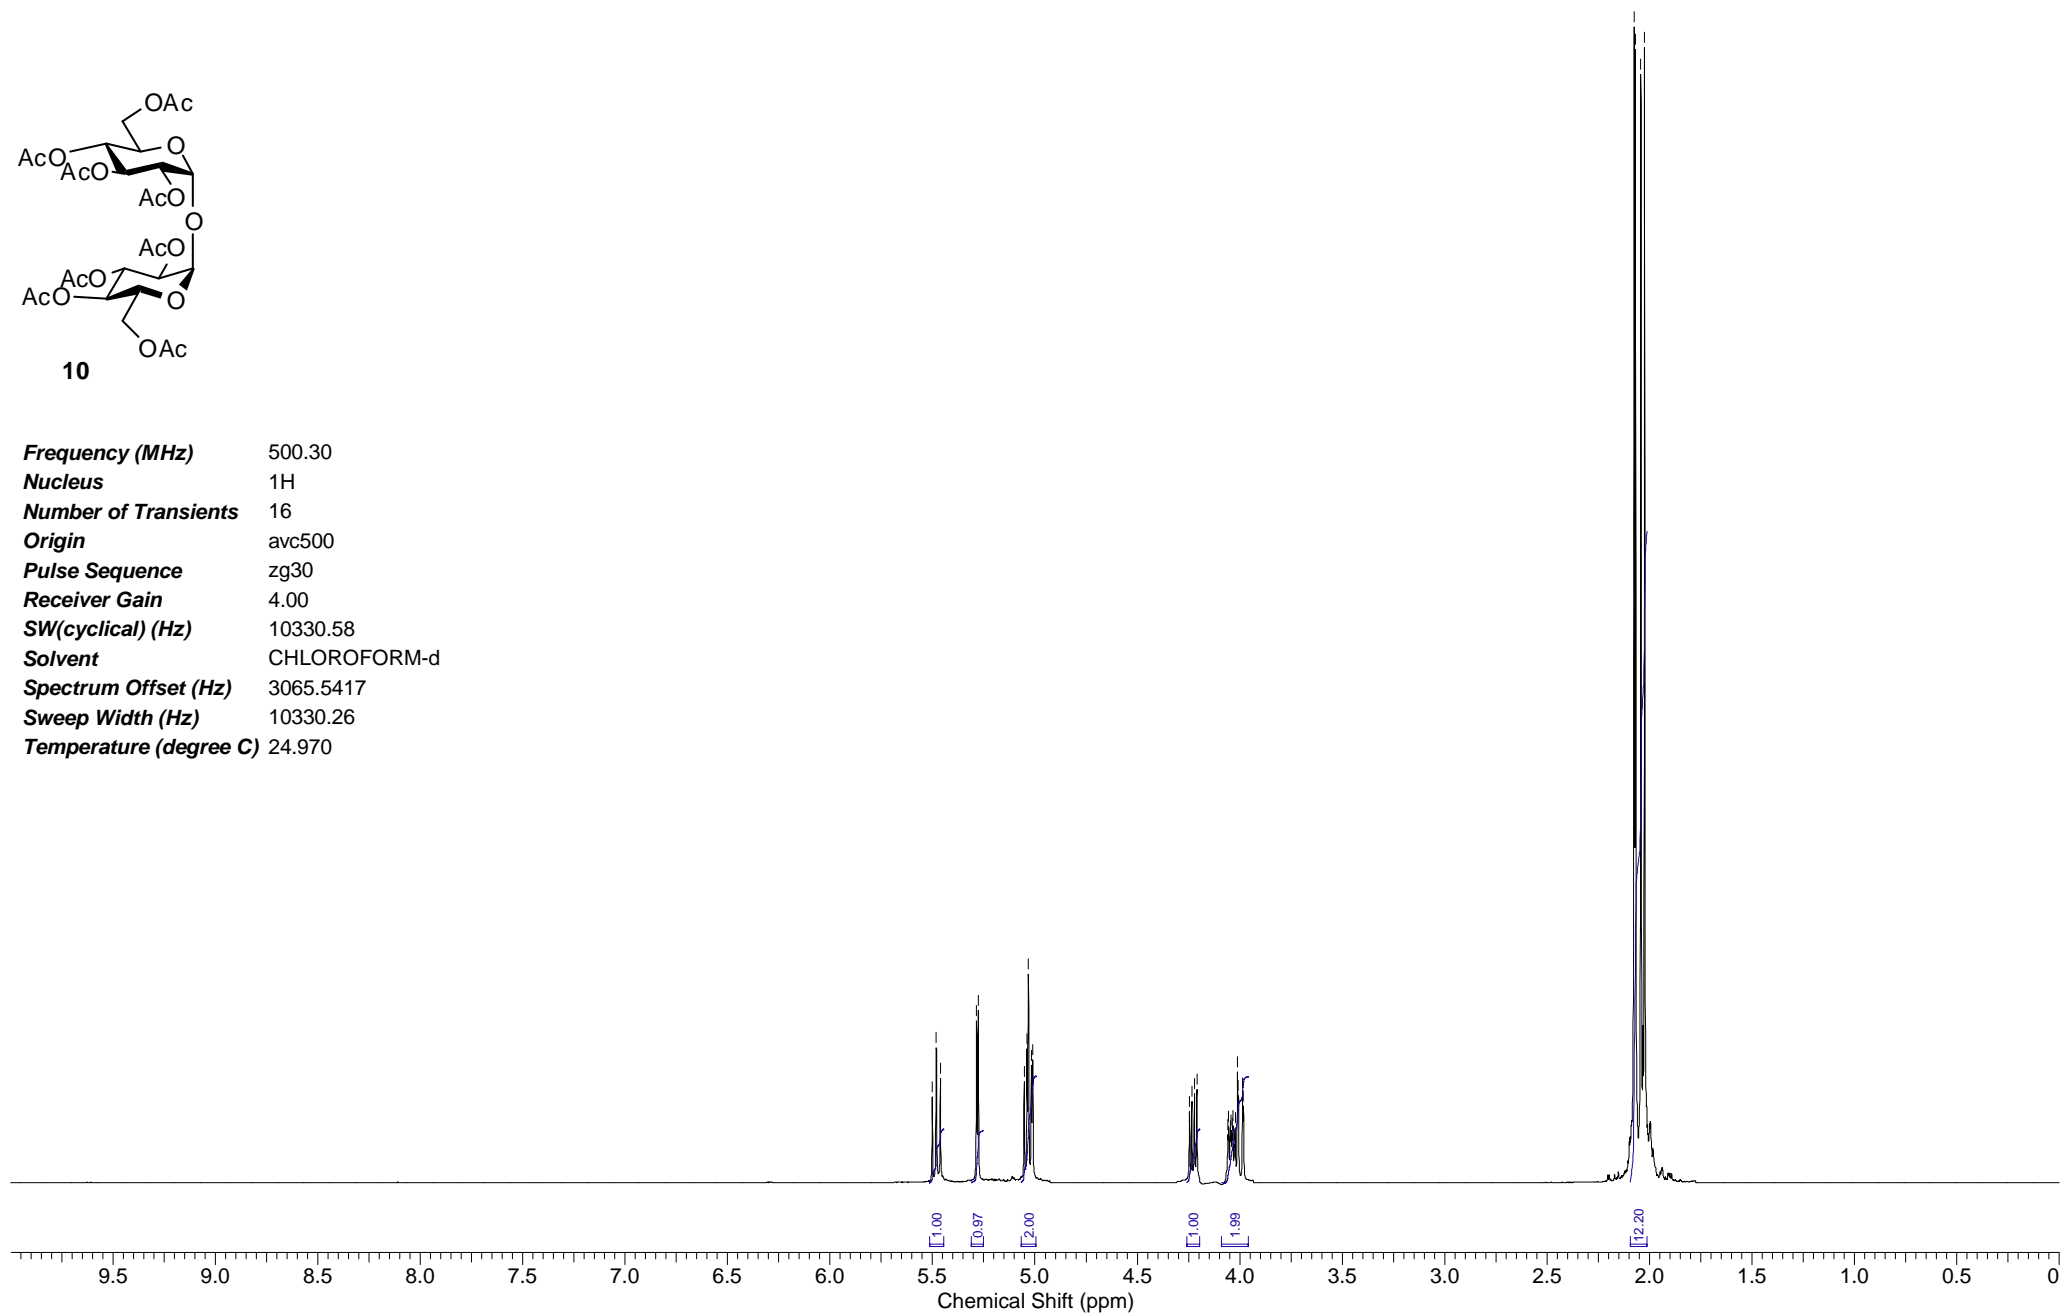

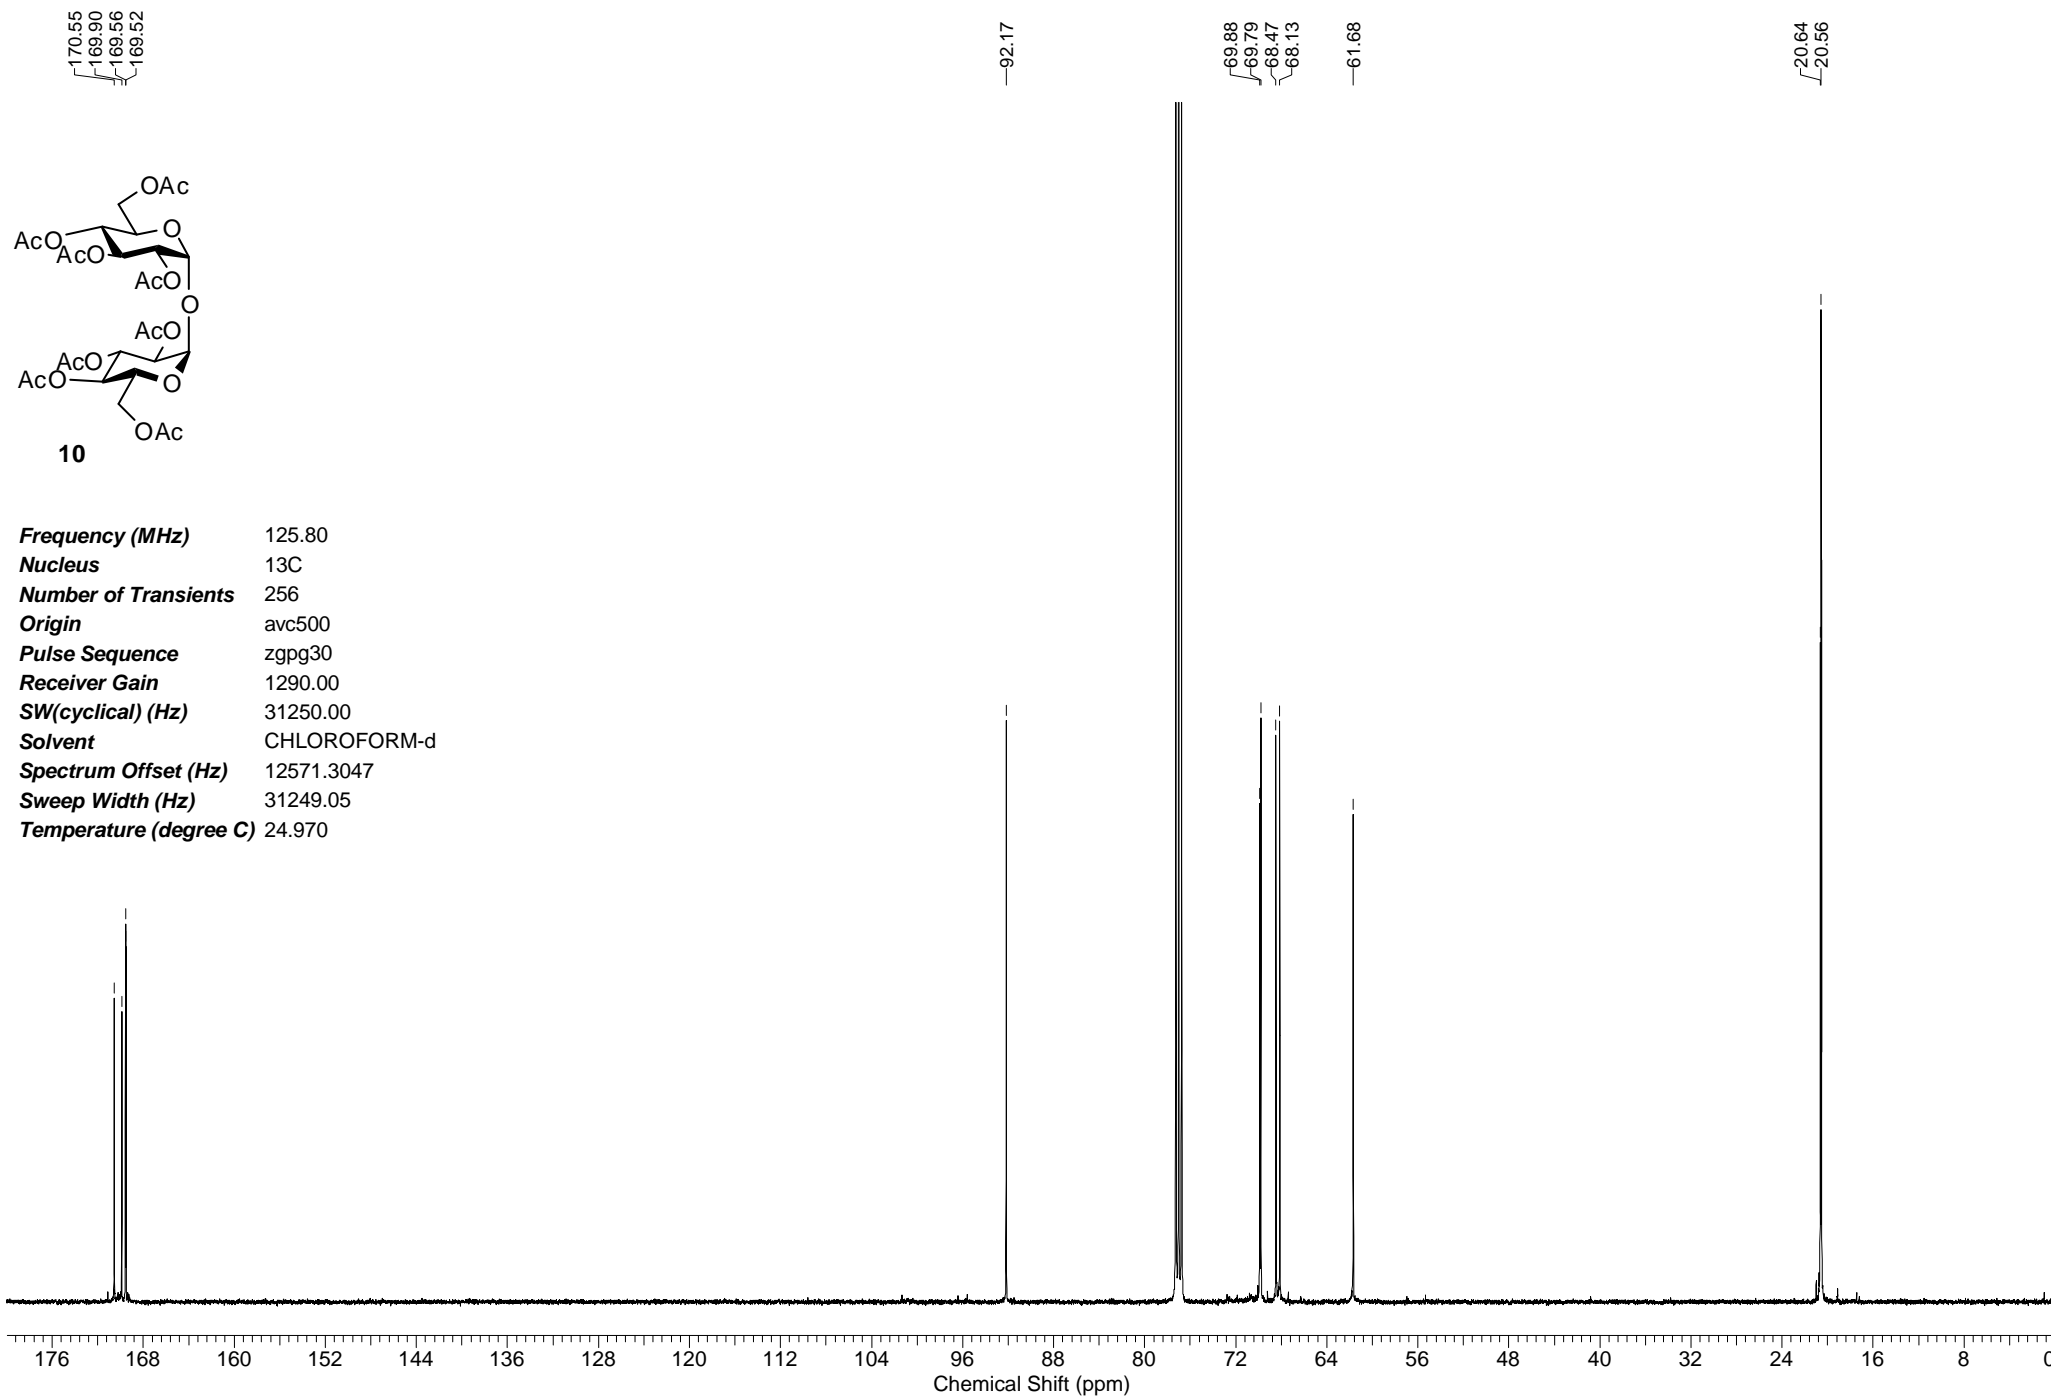

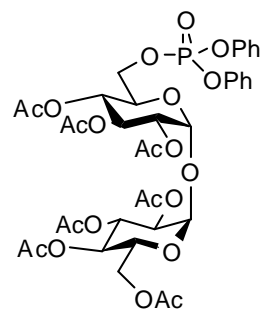

11

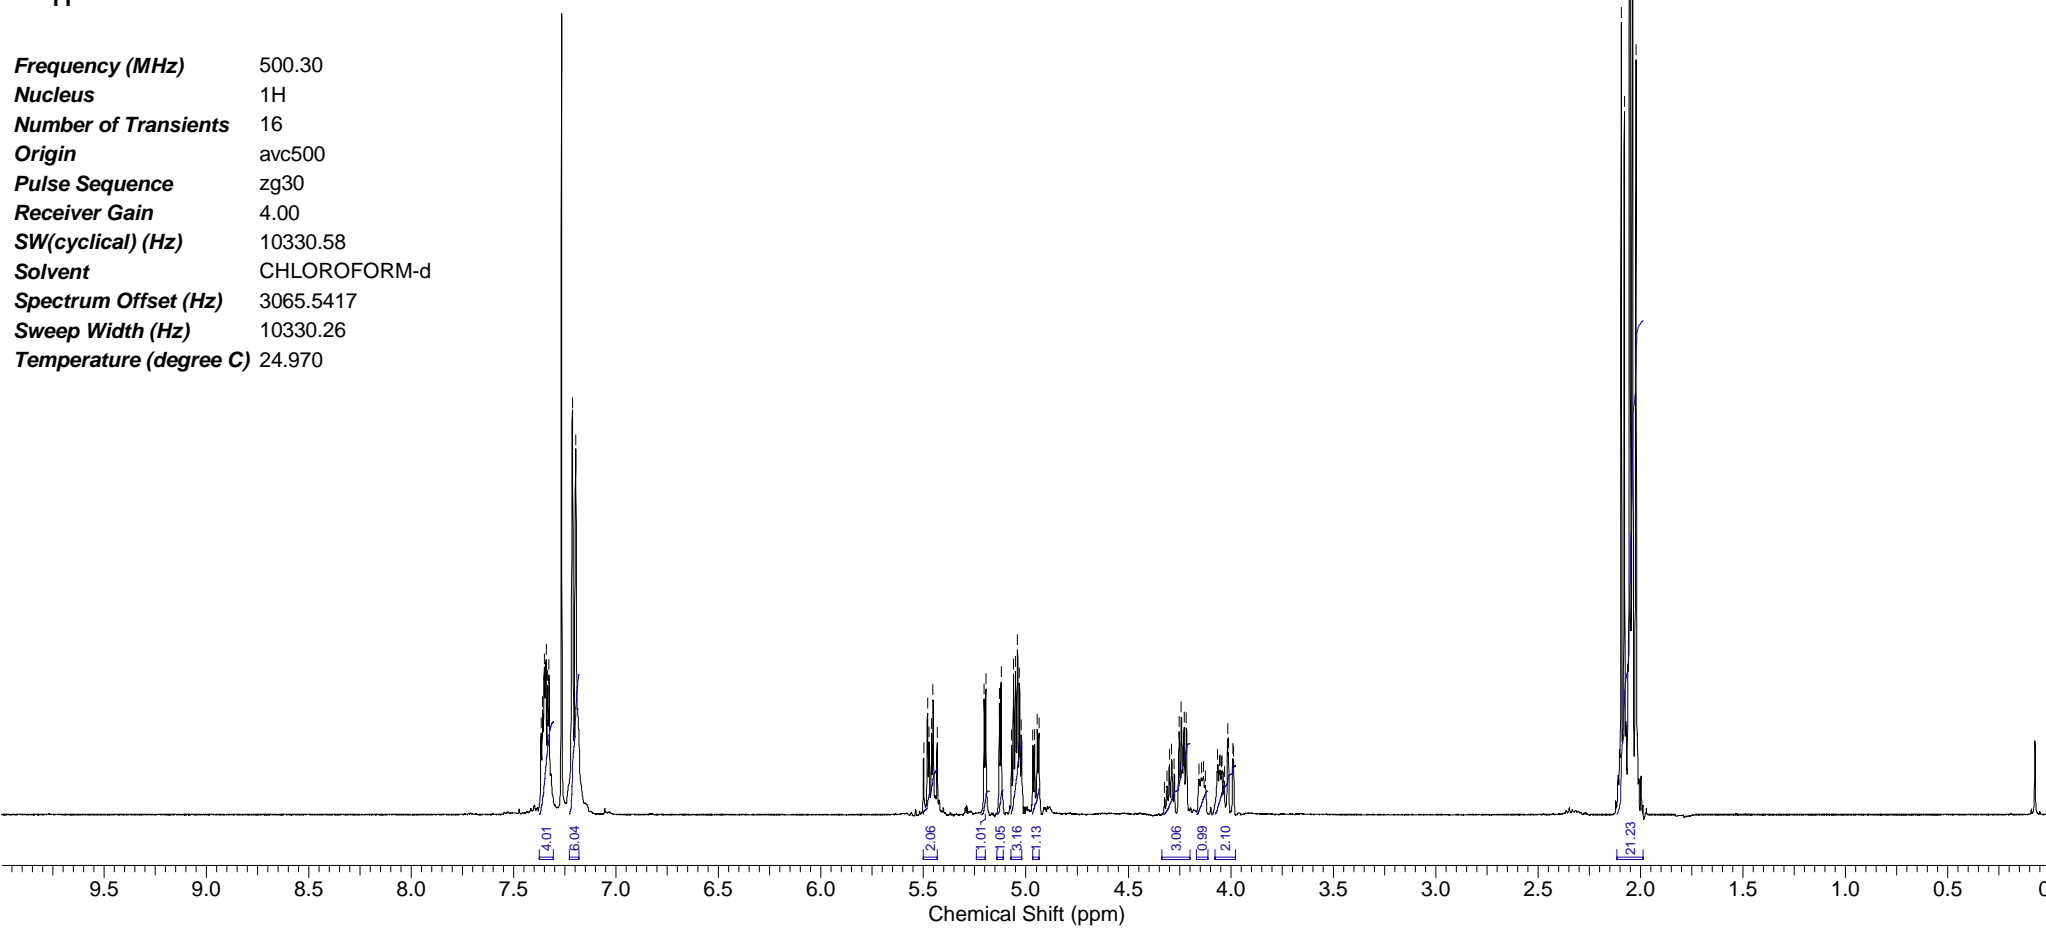

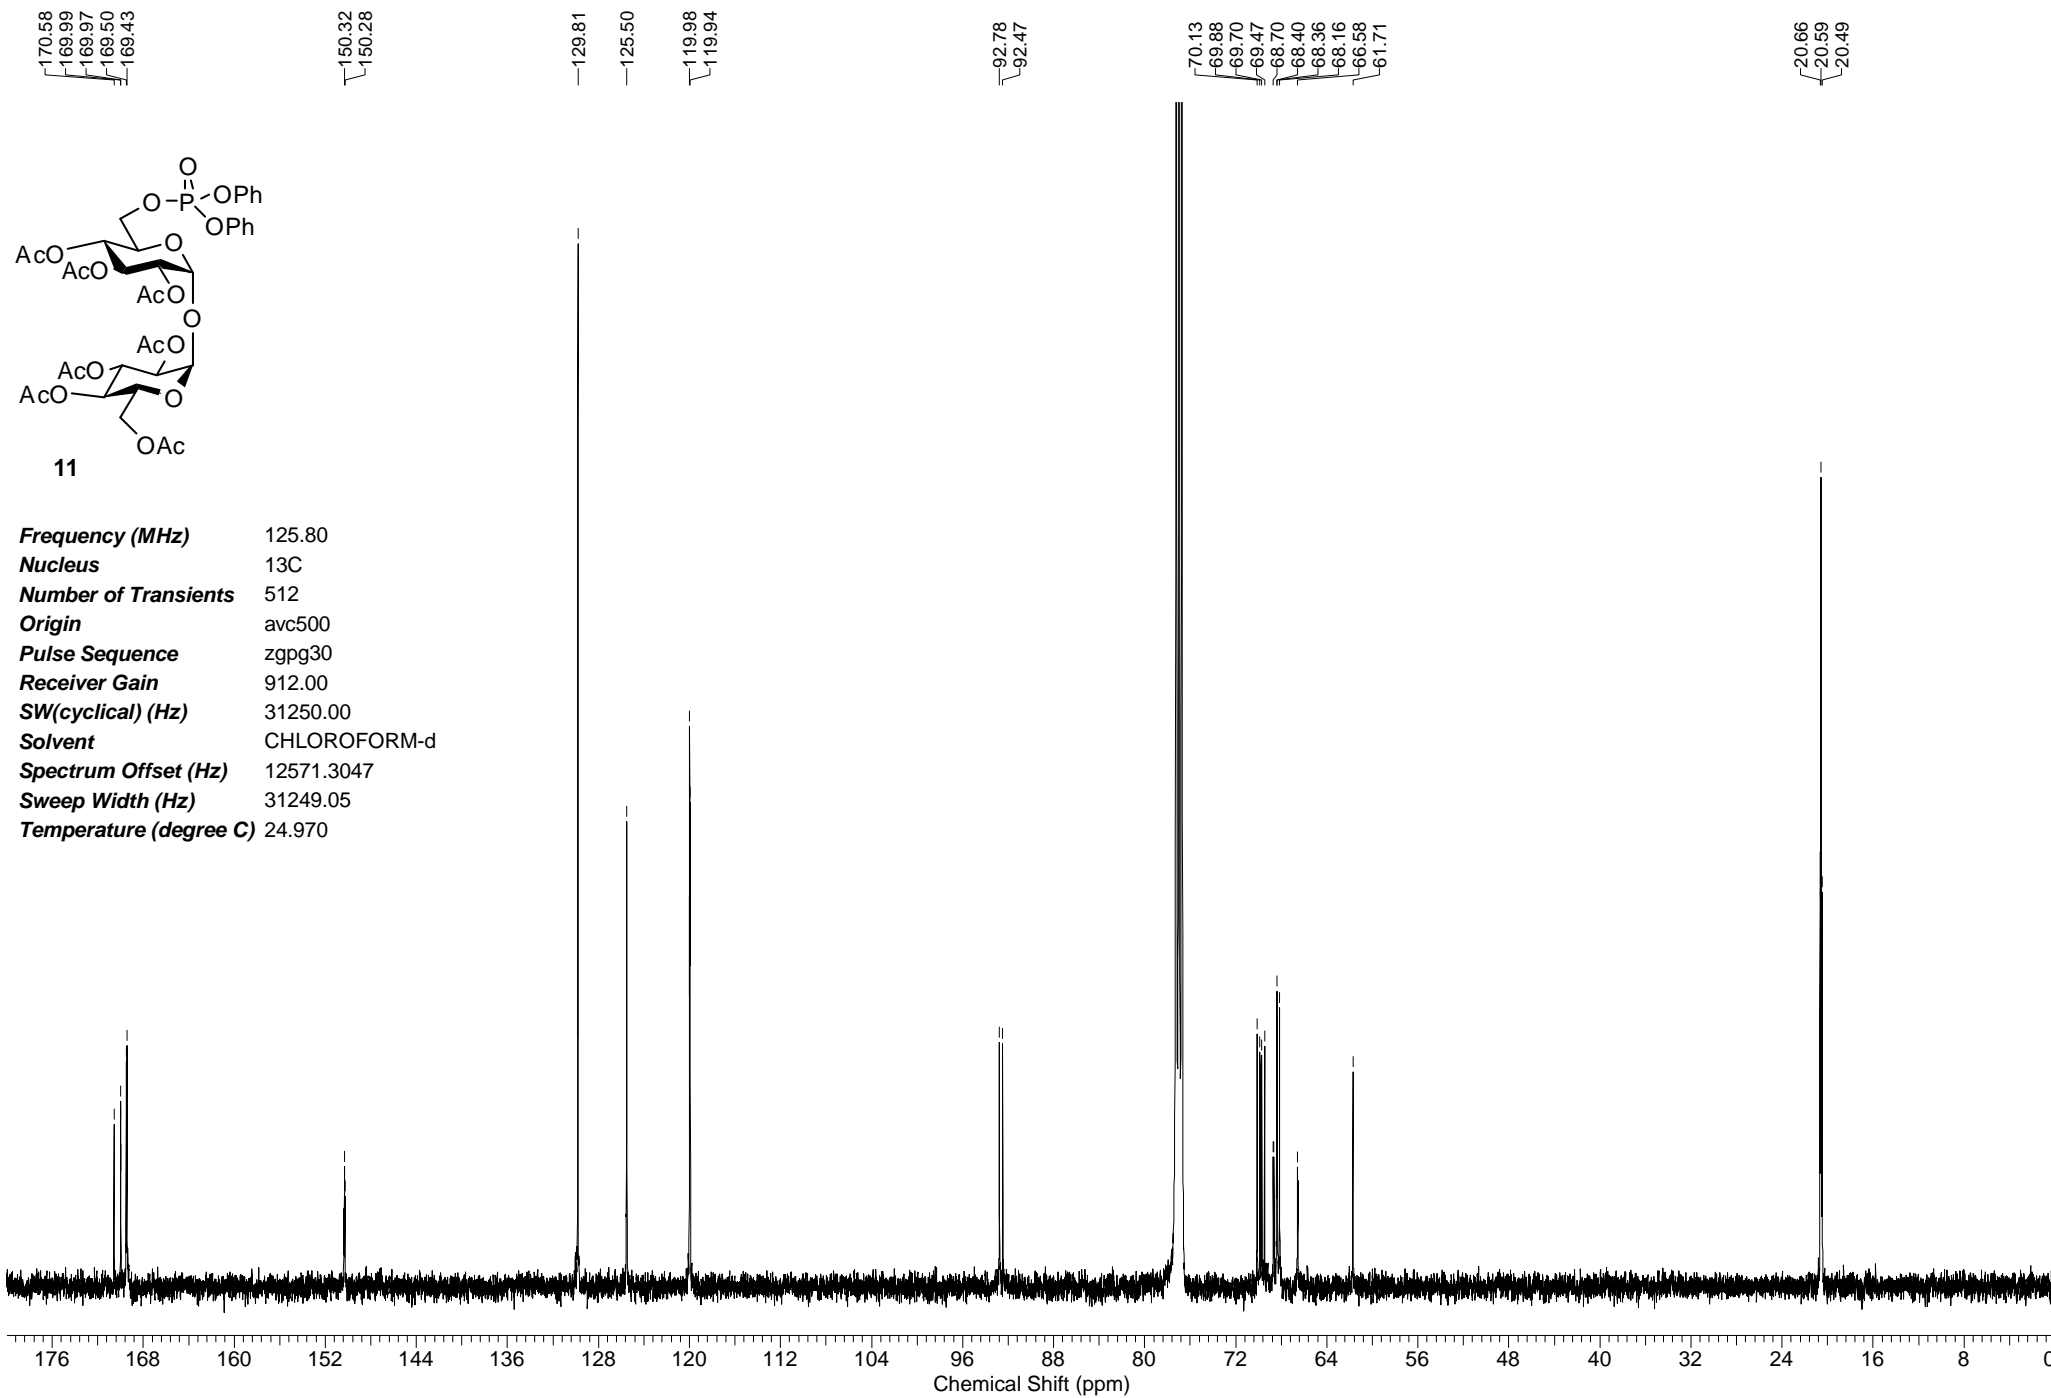

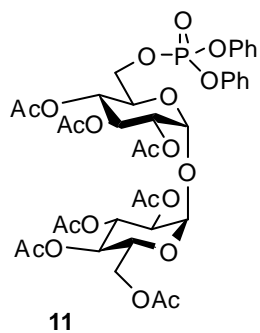

**Frequency (MHz)** 162.00  
**Nucleus** 31P  
**Number of Transients** 32  
**Origin** av400  
**Pulse Sequence** zgpg30  
**Receiver Gain** 23170.50  
**SW(cyclical) (Hz)** 64935.07  
**Solvent** CHLOROFORM-d  
**Spectrum Offset (Hz)** -8099.8774  
**Sweep Width (Hz)** 64933.09  
**Temperature (degree C)** 27.000

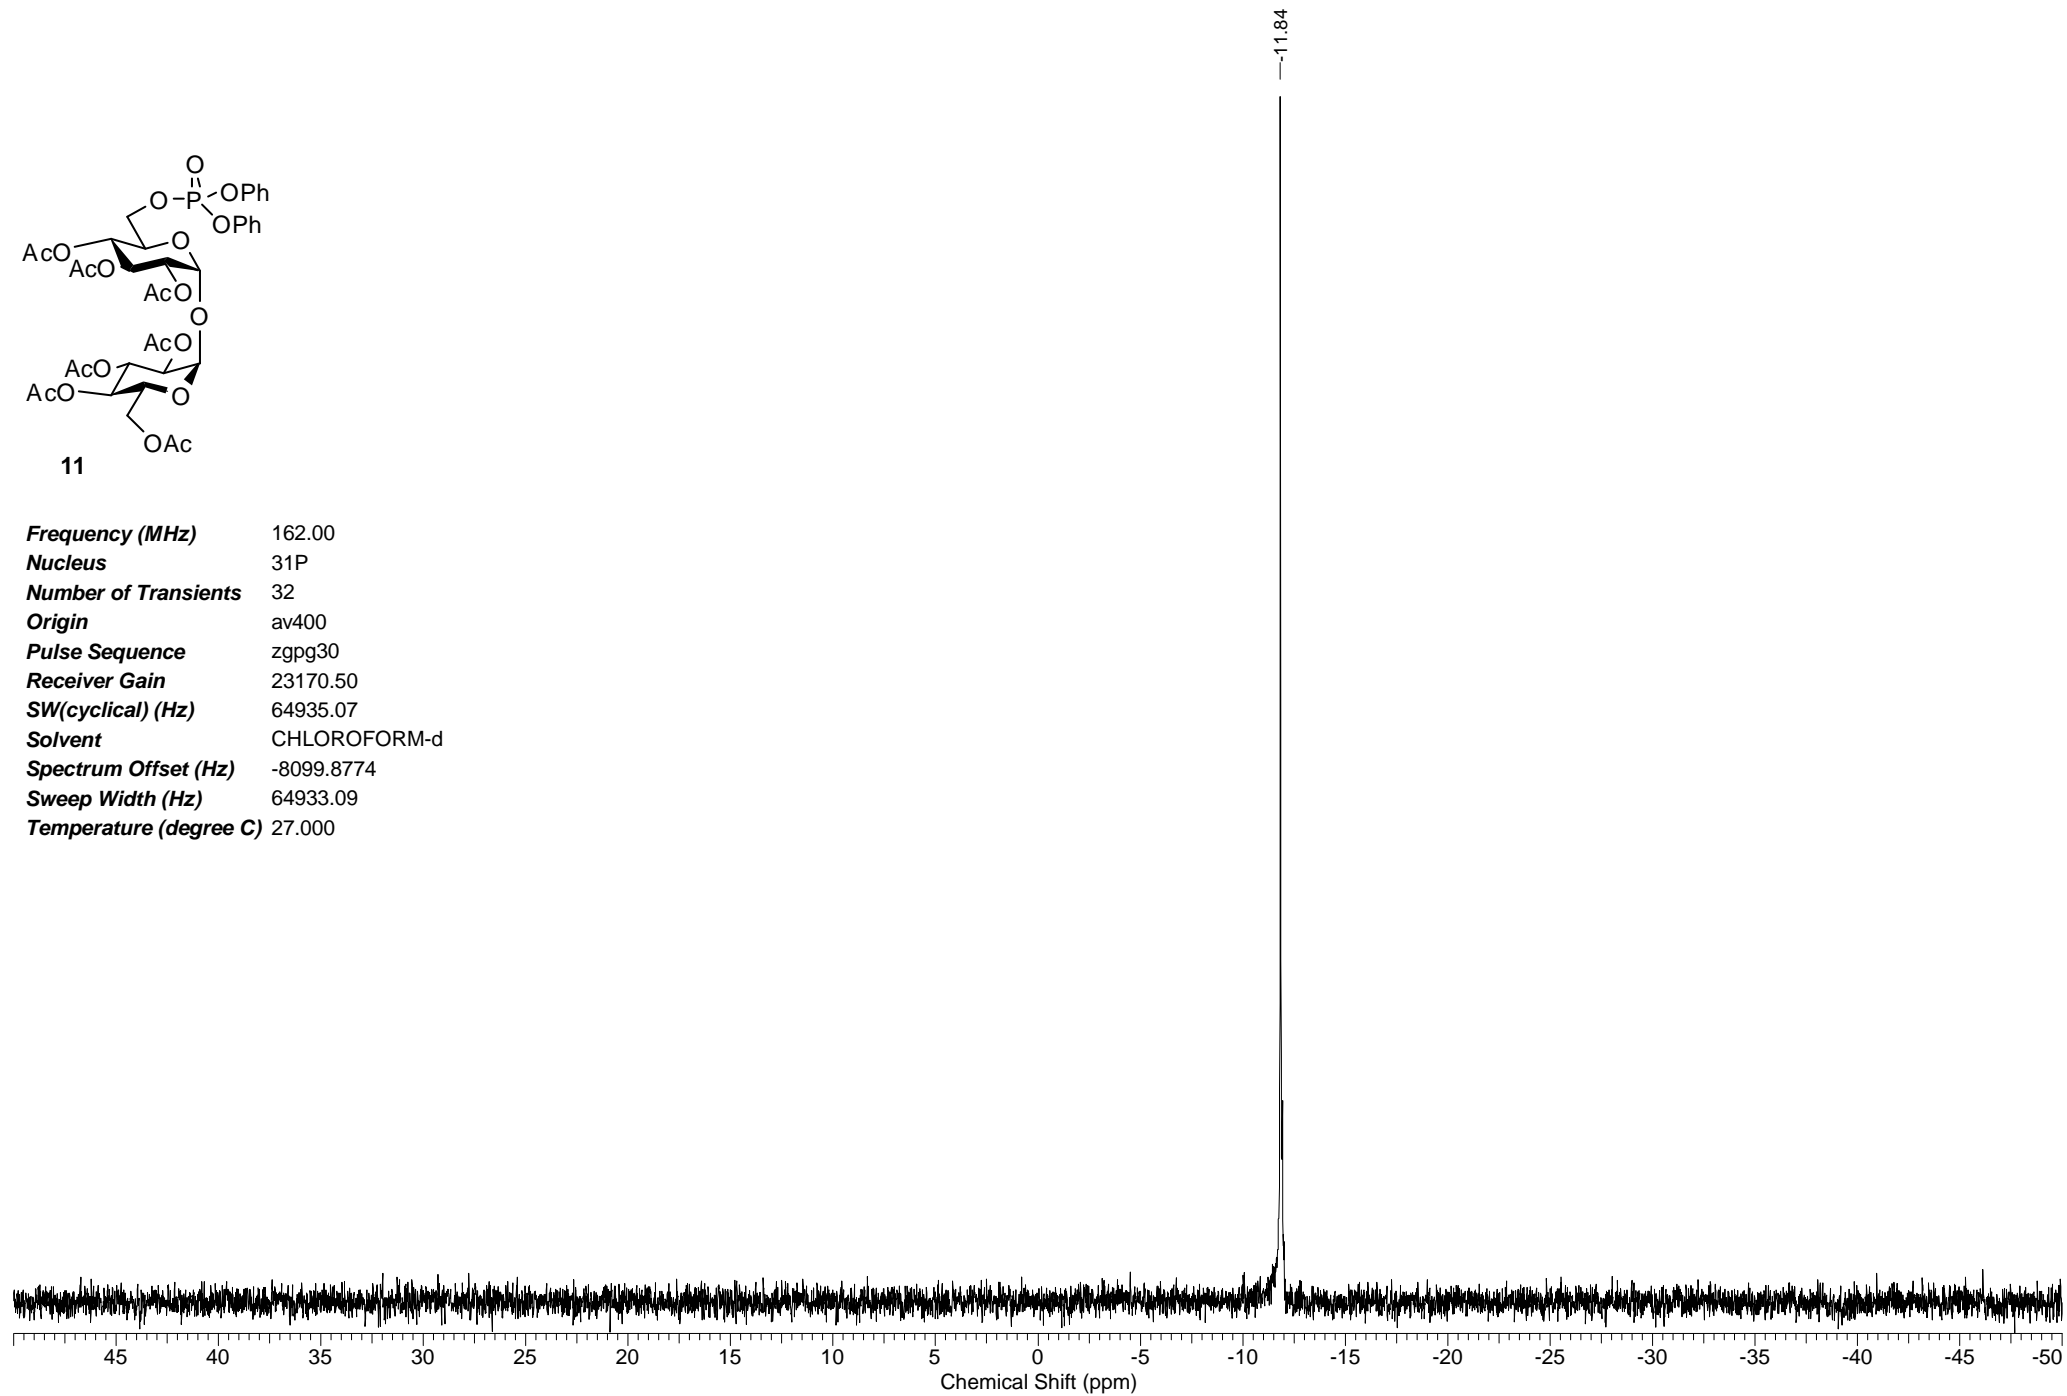

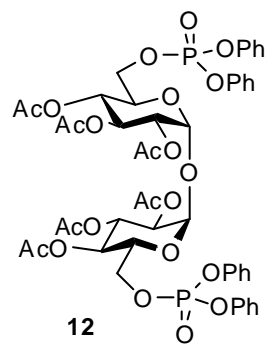

**Frequency (MHz)** 500.30  
**Nucleus** 1H  
**Number of Transients** 16  
**Origin** avc500  
**Pulse Sequence** zg30  
**Receiver Gain** 4.00  
**SW(cyclical) (Hz)** 10330.58  
**Solvent** CHLOROFORM-d  
**Spectrum Offset (Hz)** 3065.5417  
**Sweep Width (Hz)** 10330.26  
**Temperature (degree C)** 24.970

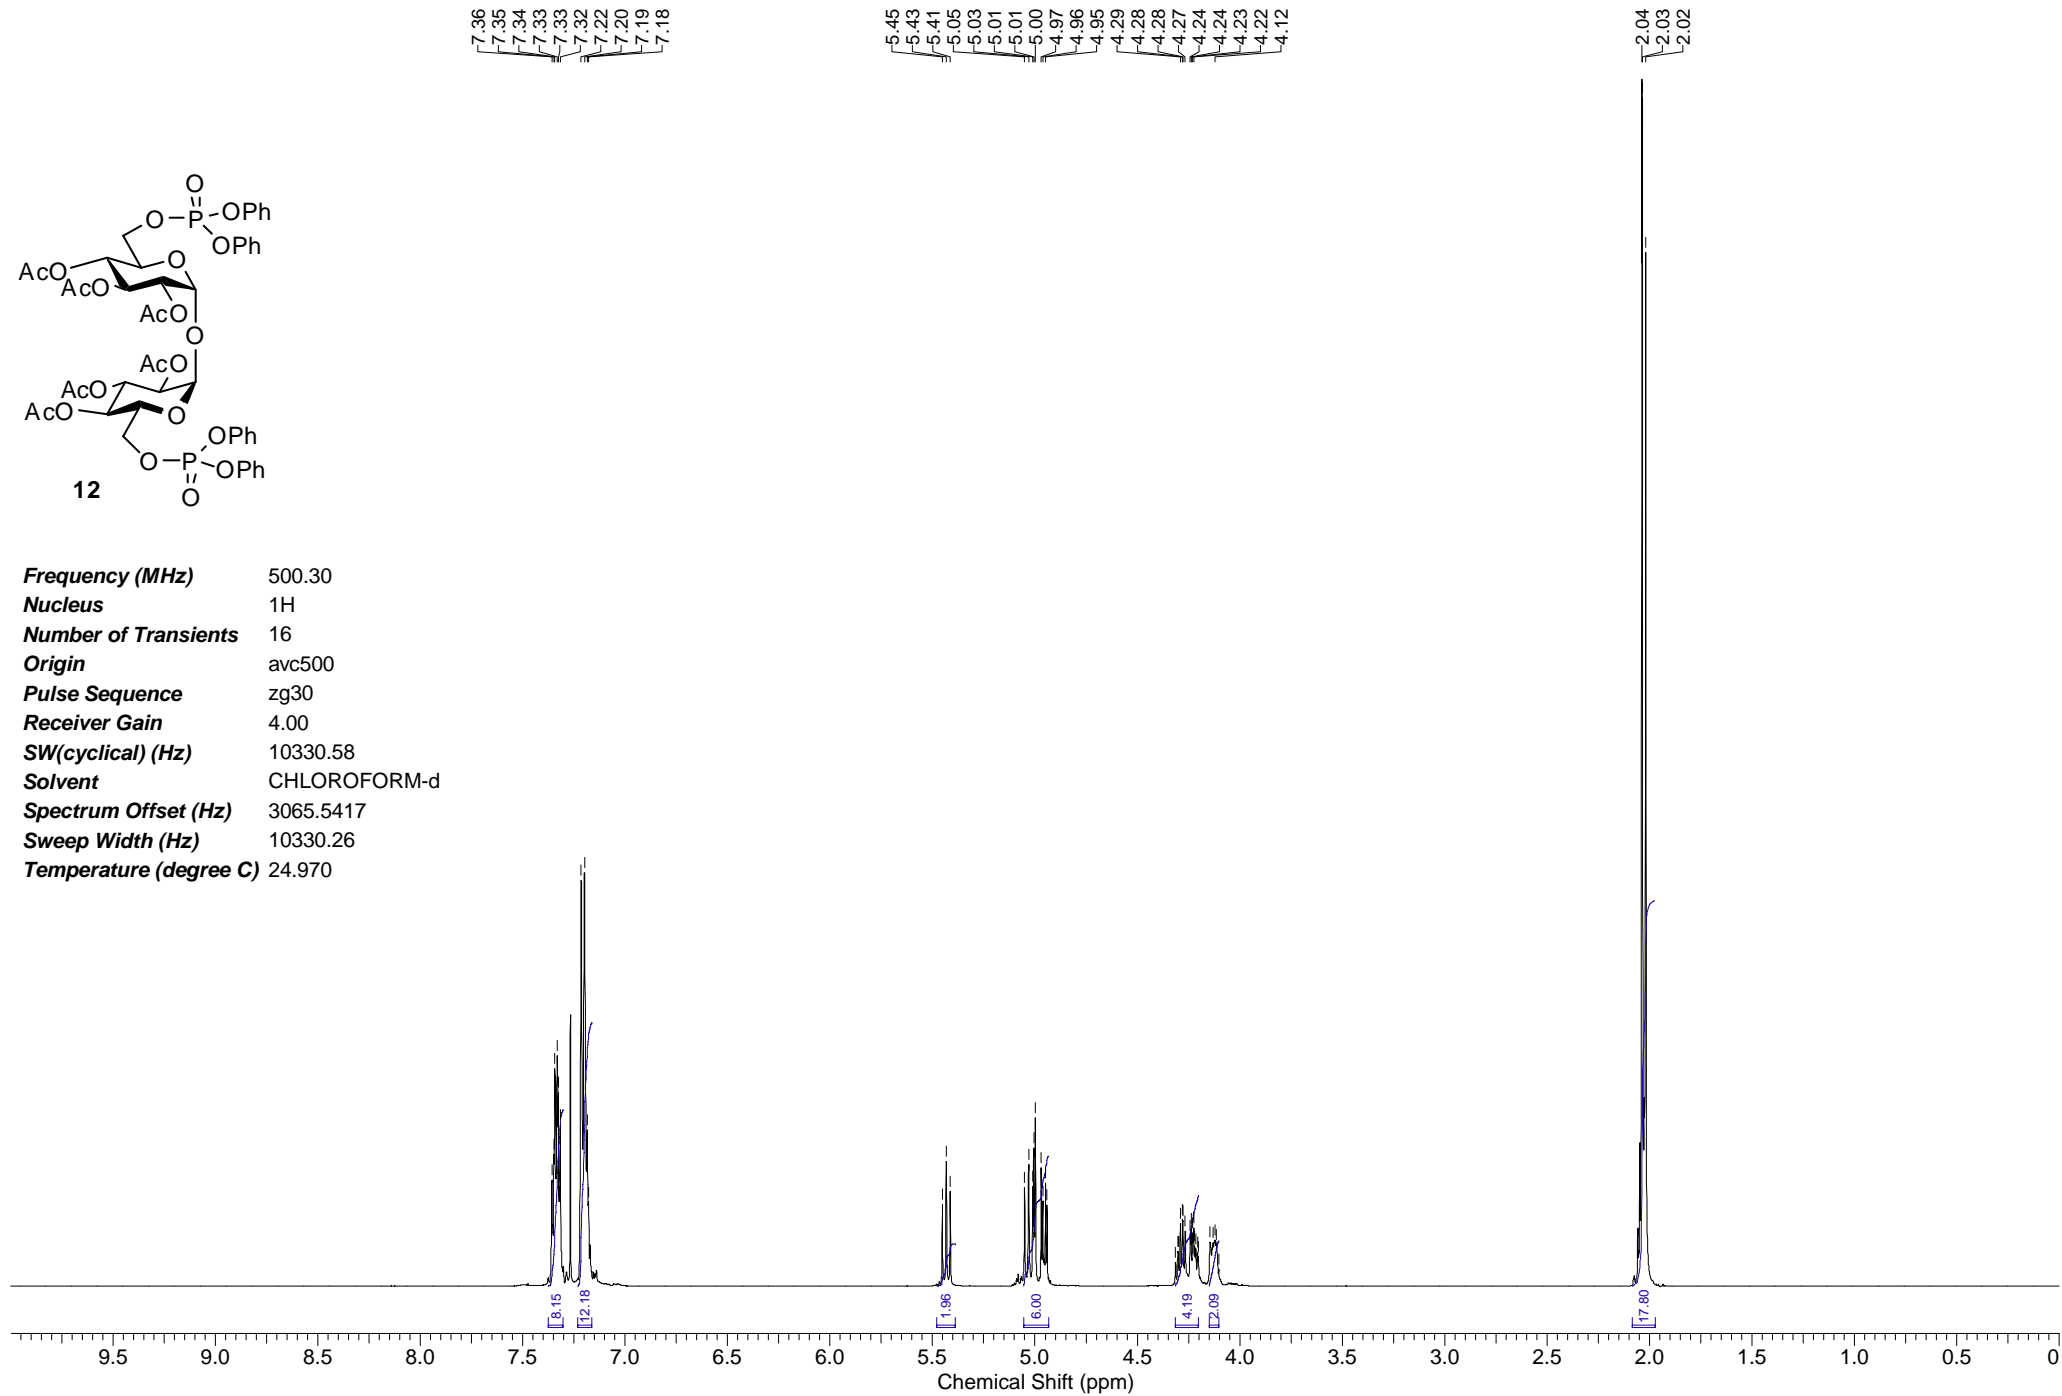

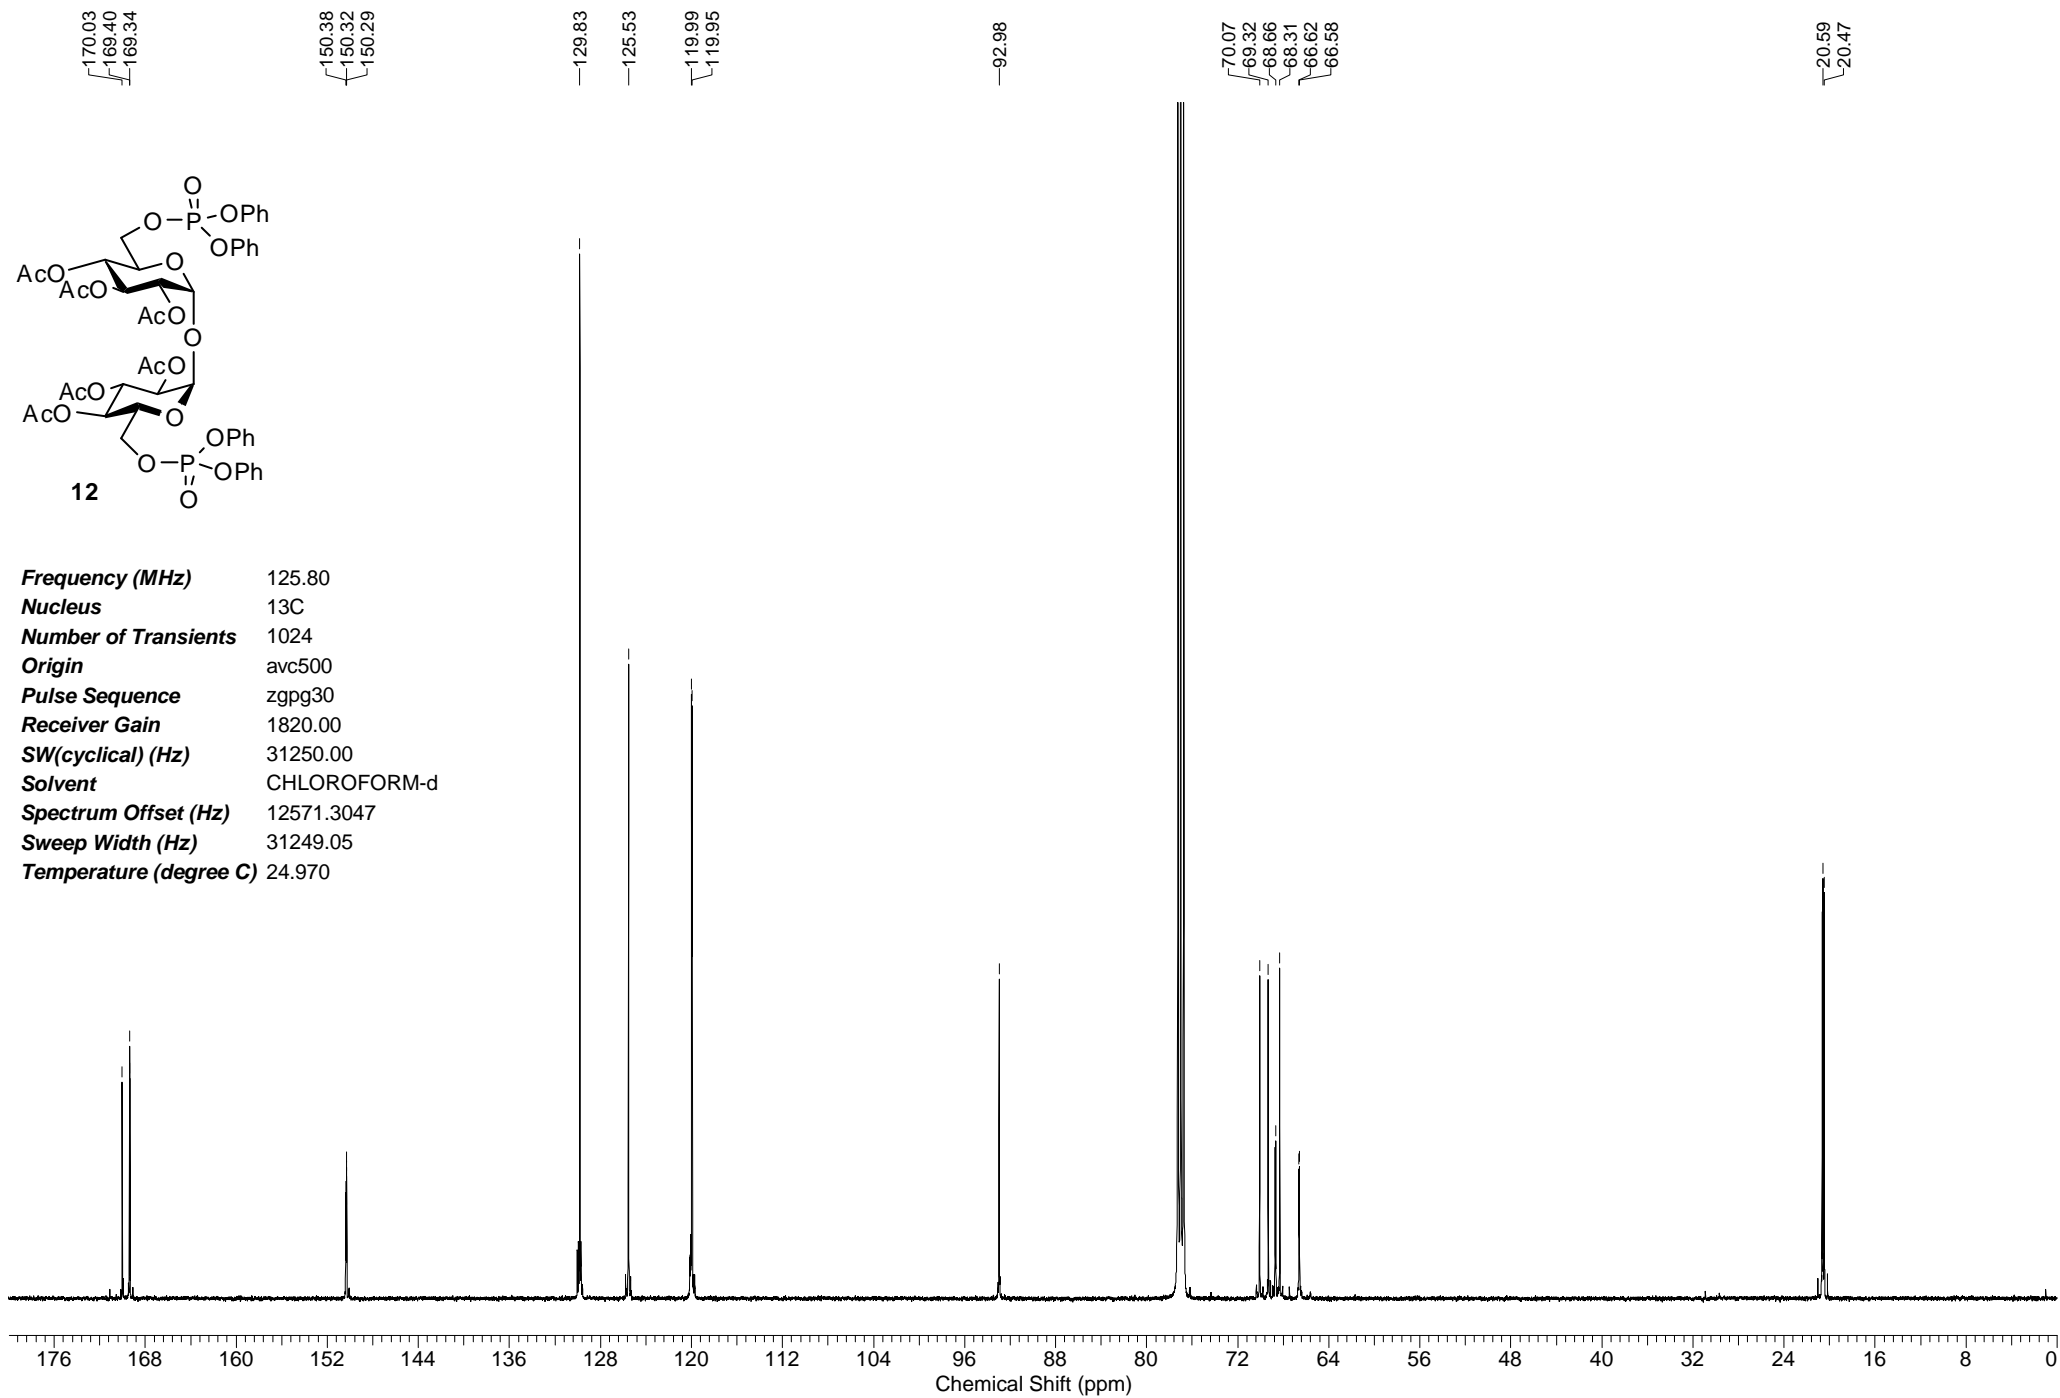

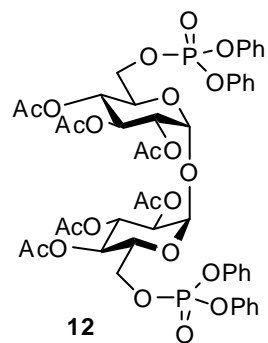

**Frequency (MHz)** 162.00  
**Nucleus** 31P  
**Number of Transients** 32  
**Origin** av400  
**Pulse Sequence** zgpg30  
**Receiver Gain** 18390.40  
**SW(cyclical) (Hz)** 64935.07  
**Solvent** CHLOROFORM-d  
**Spectrum Offset (Hz)** -8099.8774  
**Sweep Width (Hz)** 64933.09  
**Temperature (degree C)** 27.000

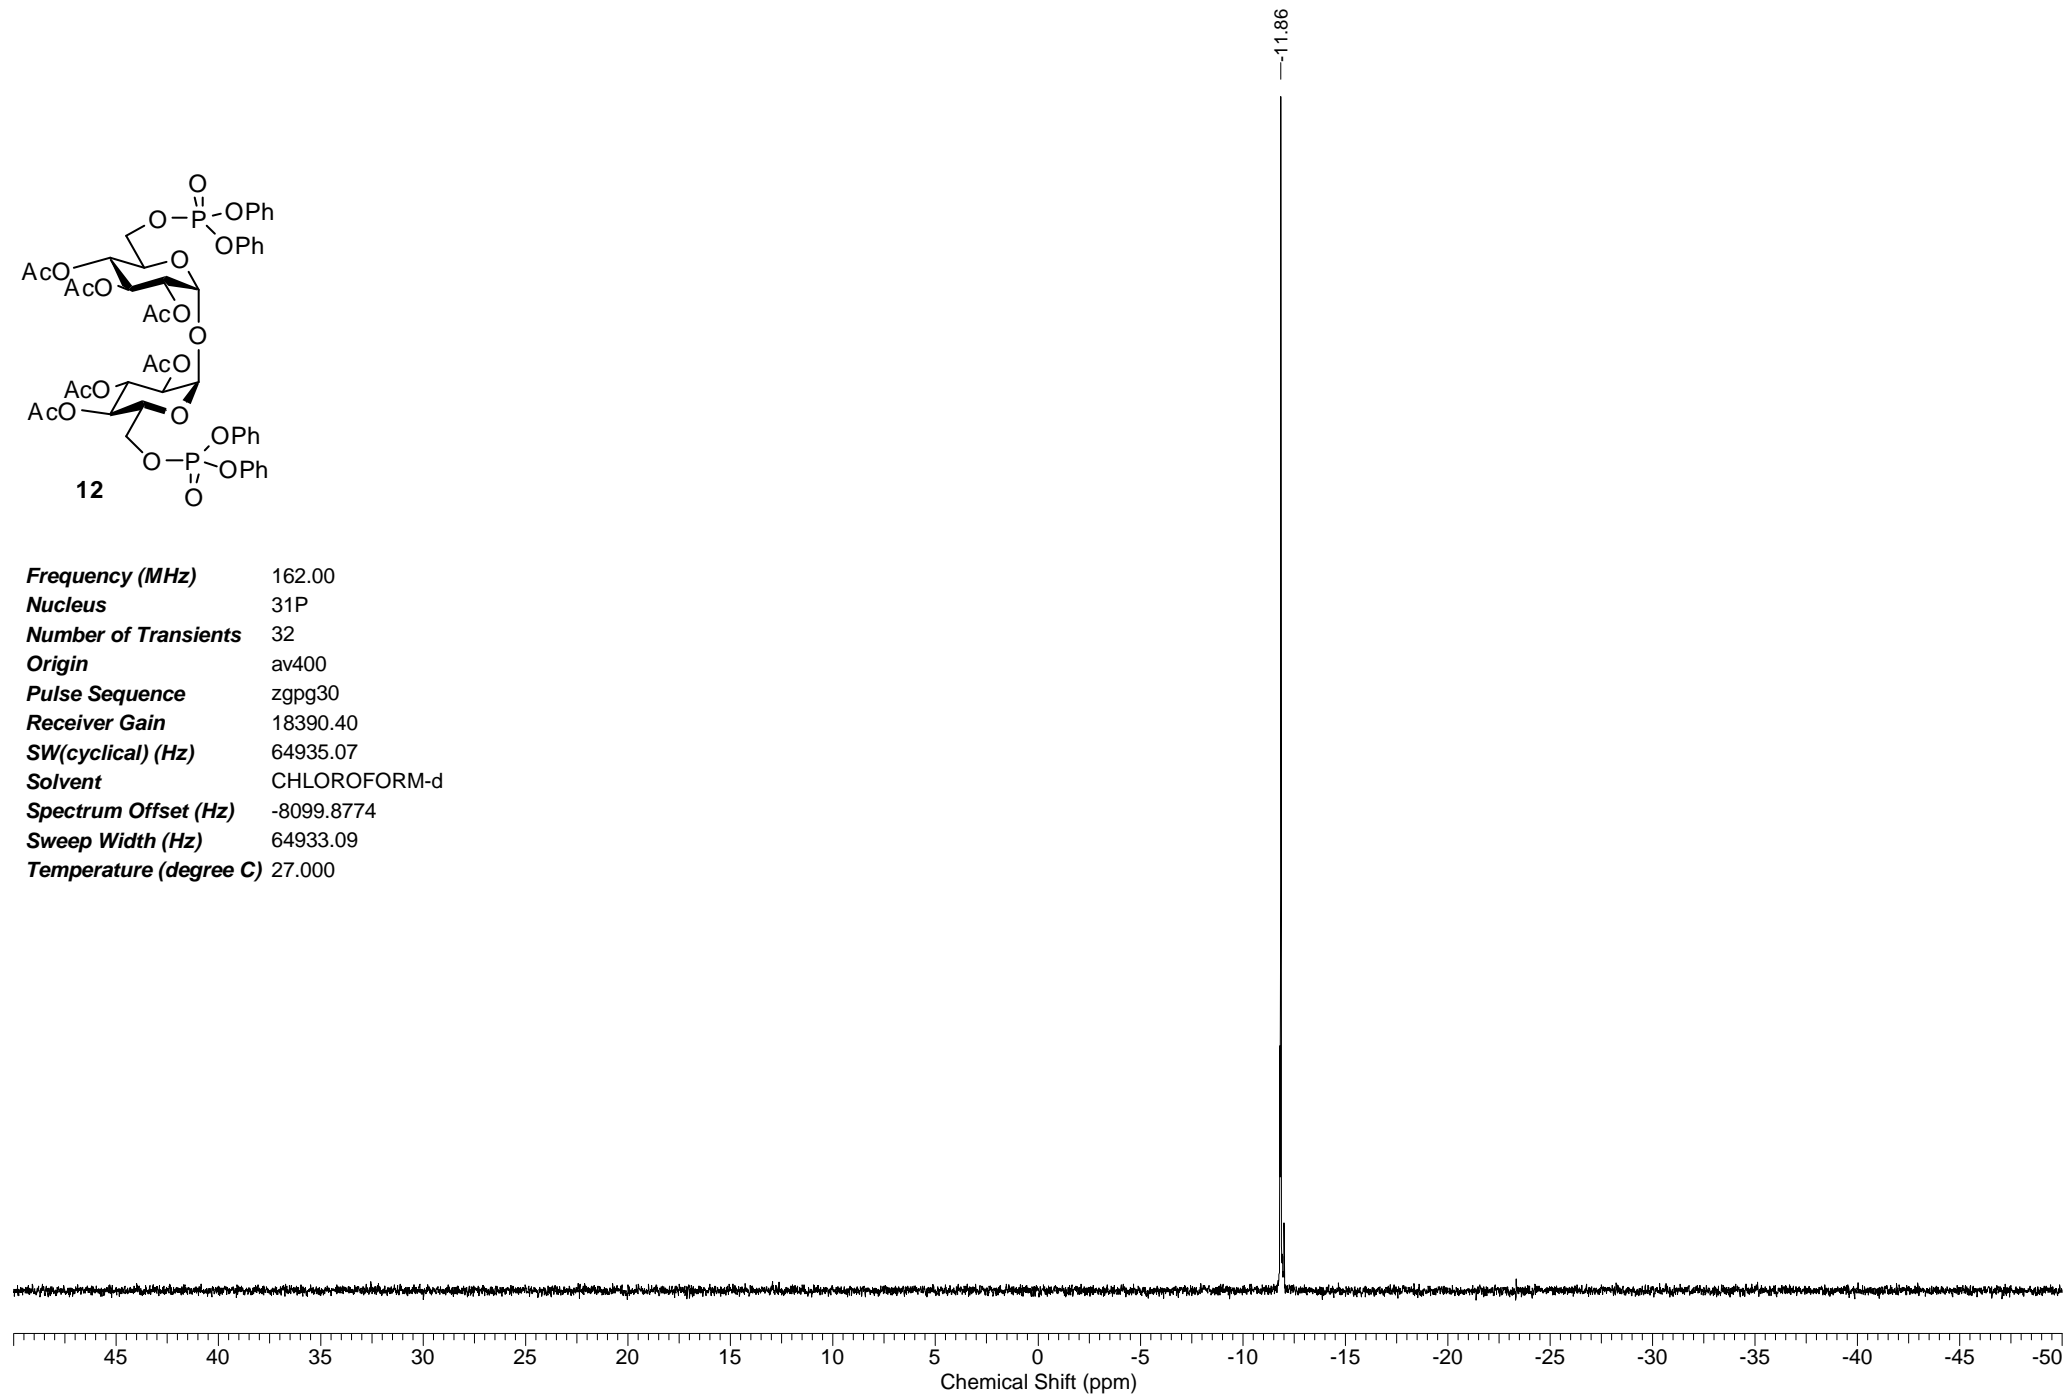



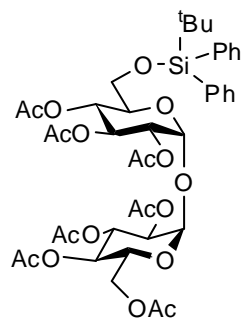

13

**Frequency (MHz)** 500.30  
**Nucleus** 1H  
**Number of Transients** 16  
**Origin** avc500  
**Pulse Sequence** zg30  
**Receiver Gain** 4.00  
**SW(cyclical) (Hz)** 10330.58  
**Solvent** CHLOROFORM-d  
**Spectrum Offset (Hz)** 3065.5417  
**Sweep Width (Hz)** 10330.26  
**Temperature (degree C)** 24.970

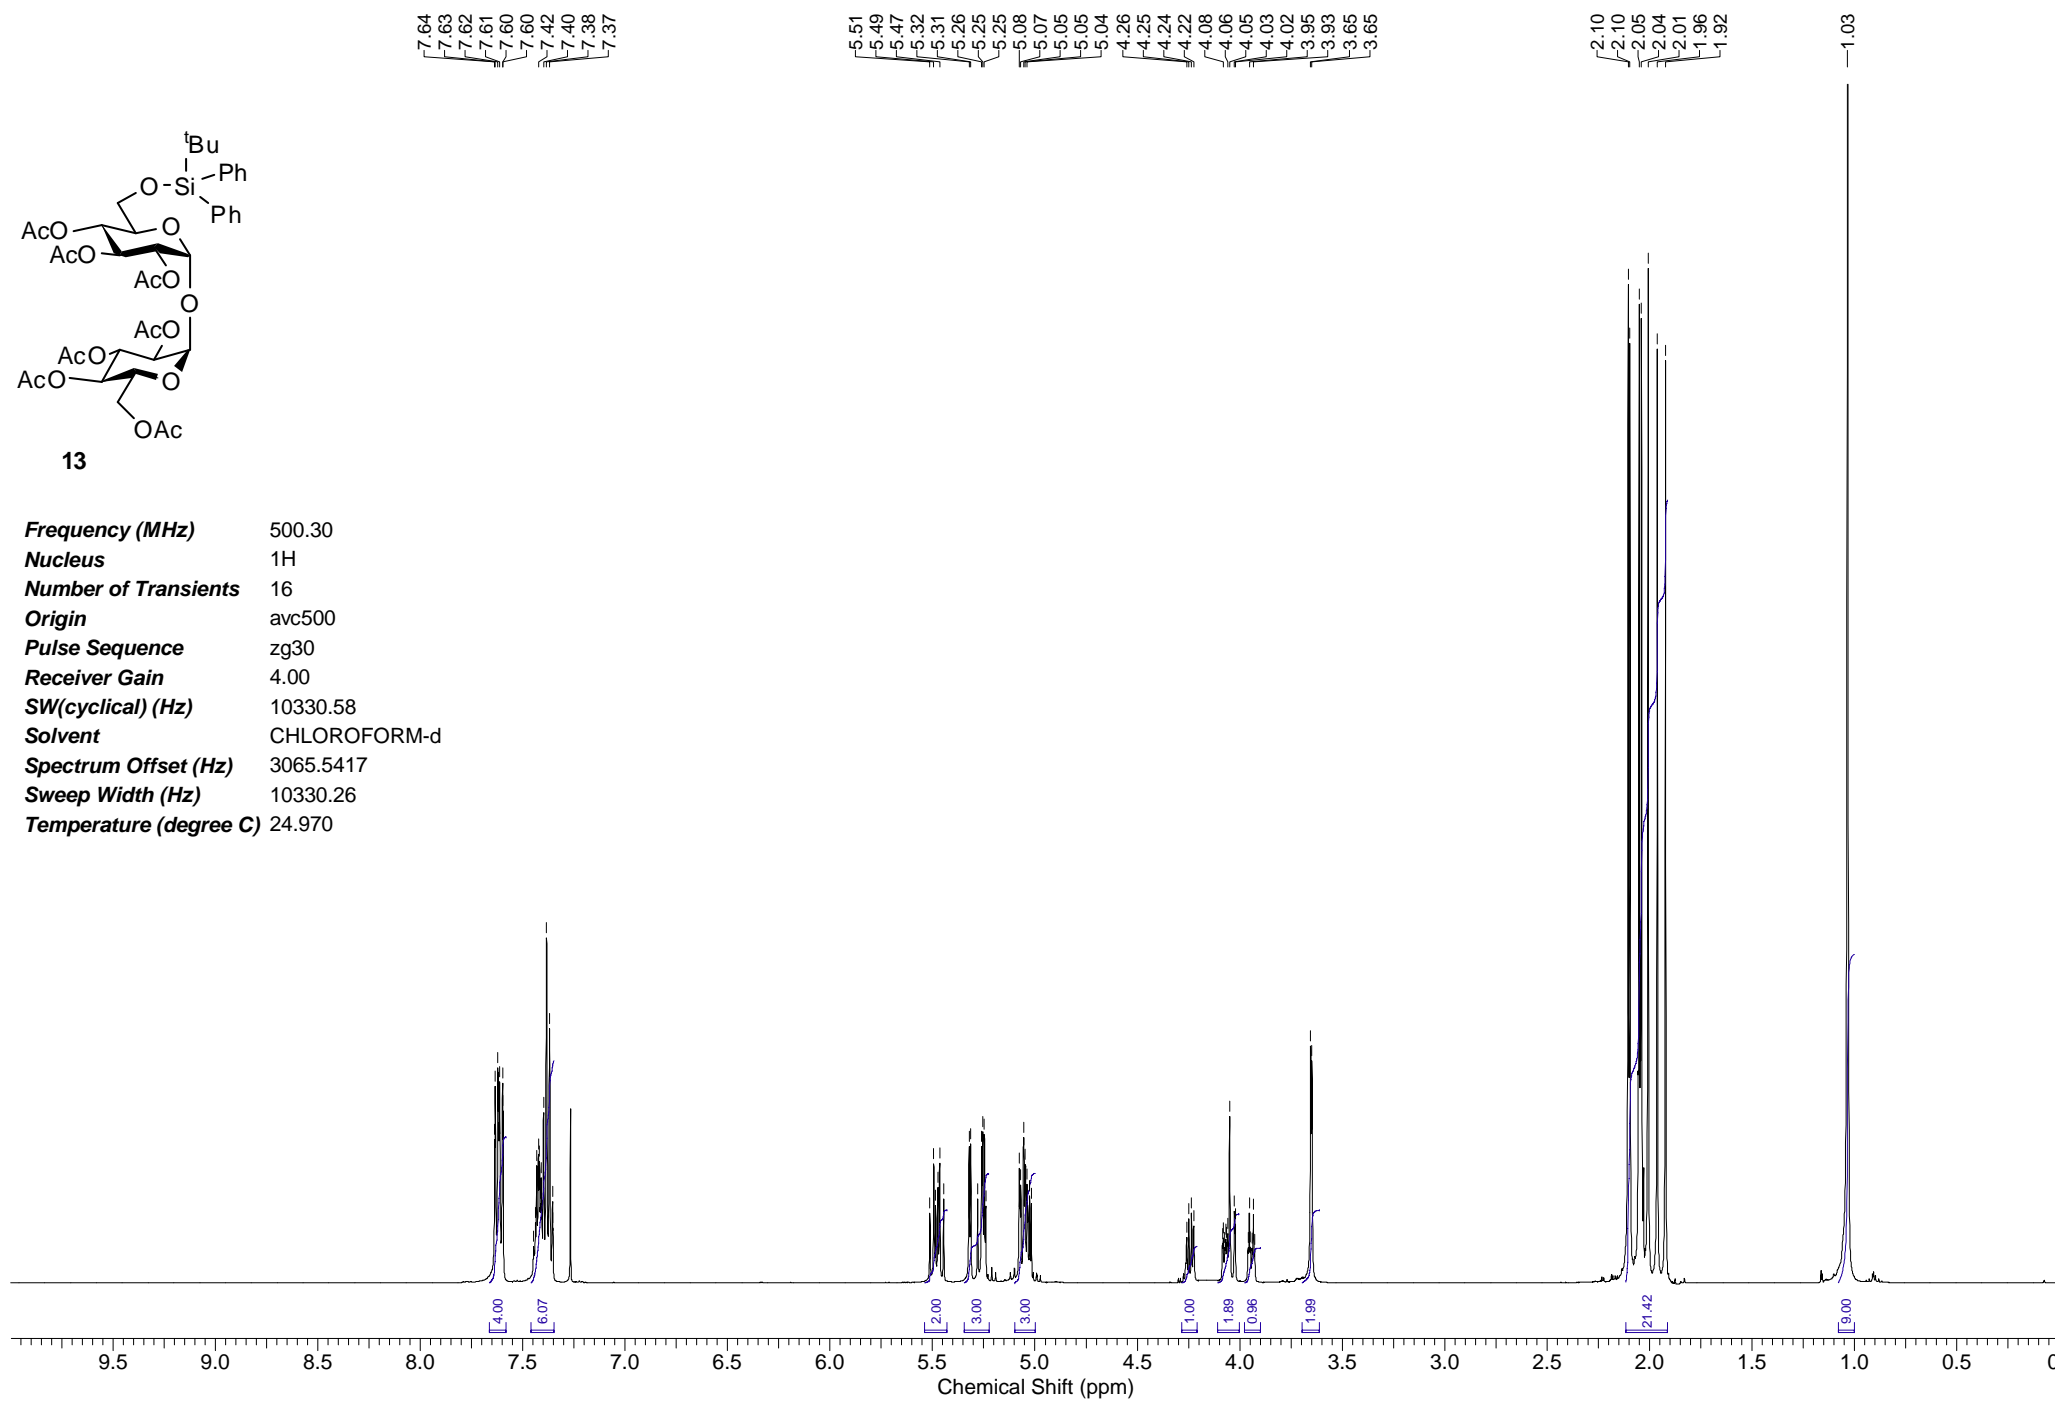

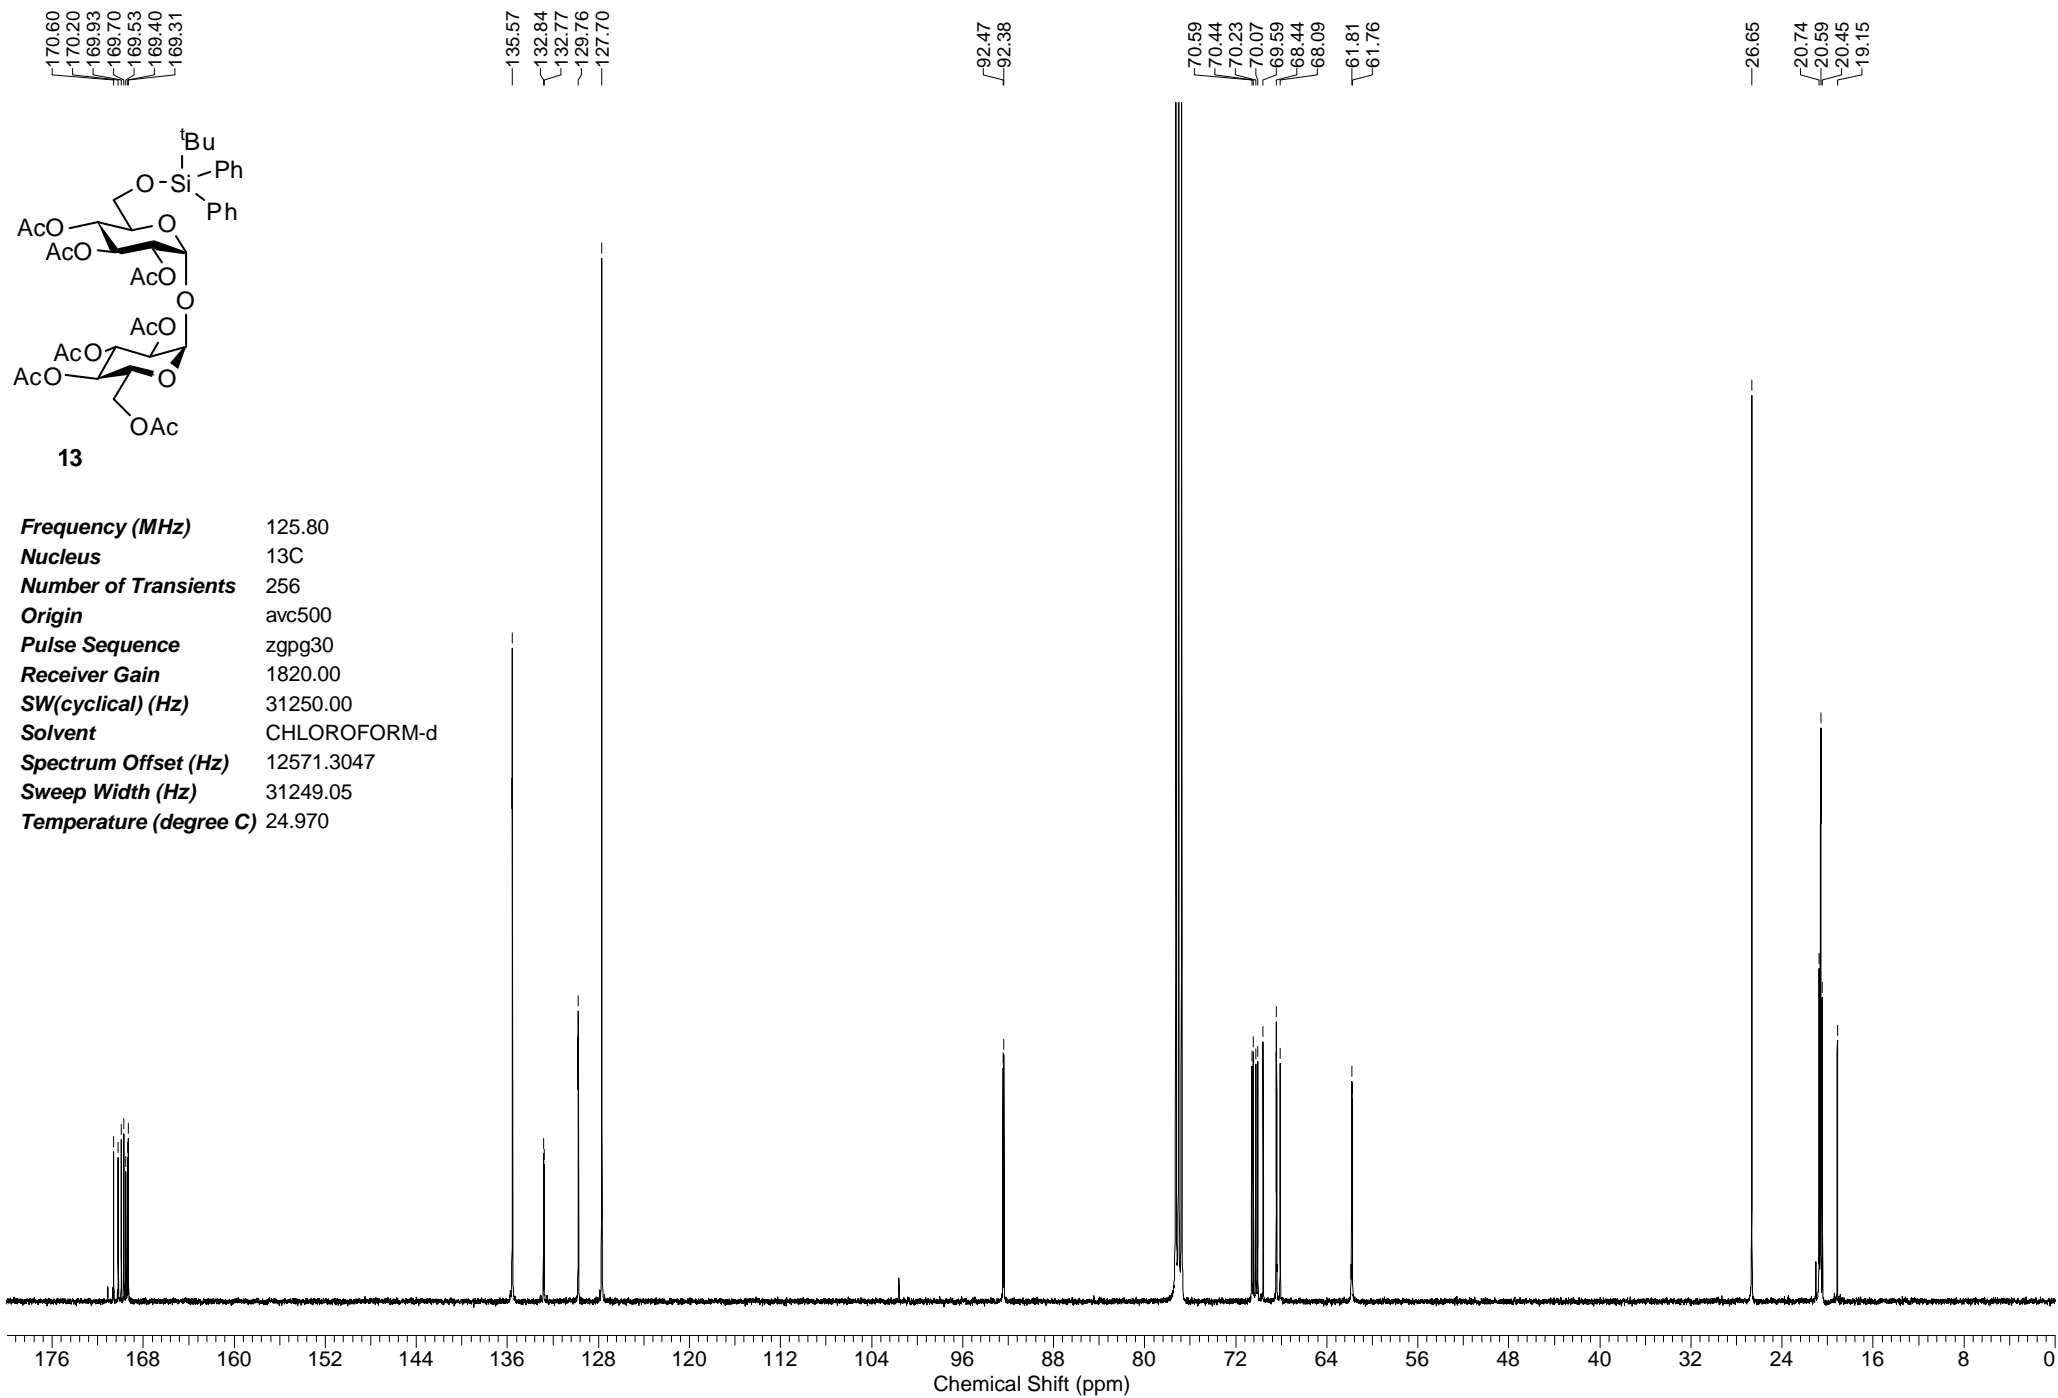

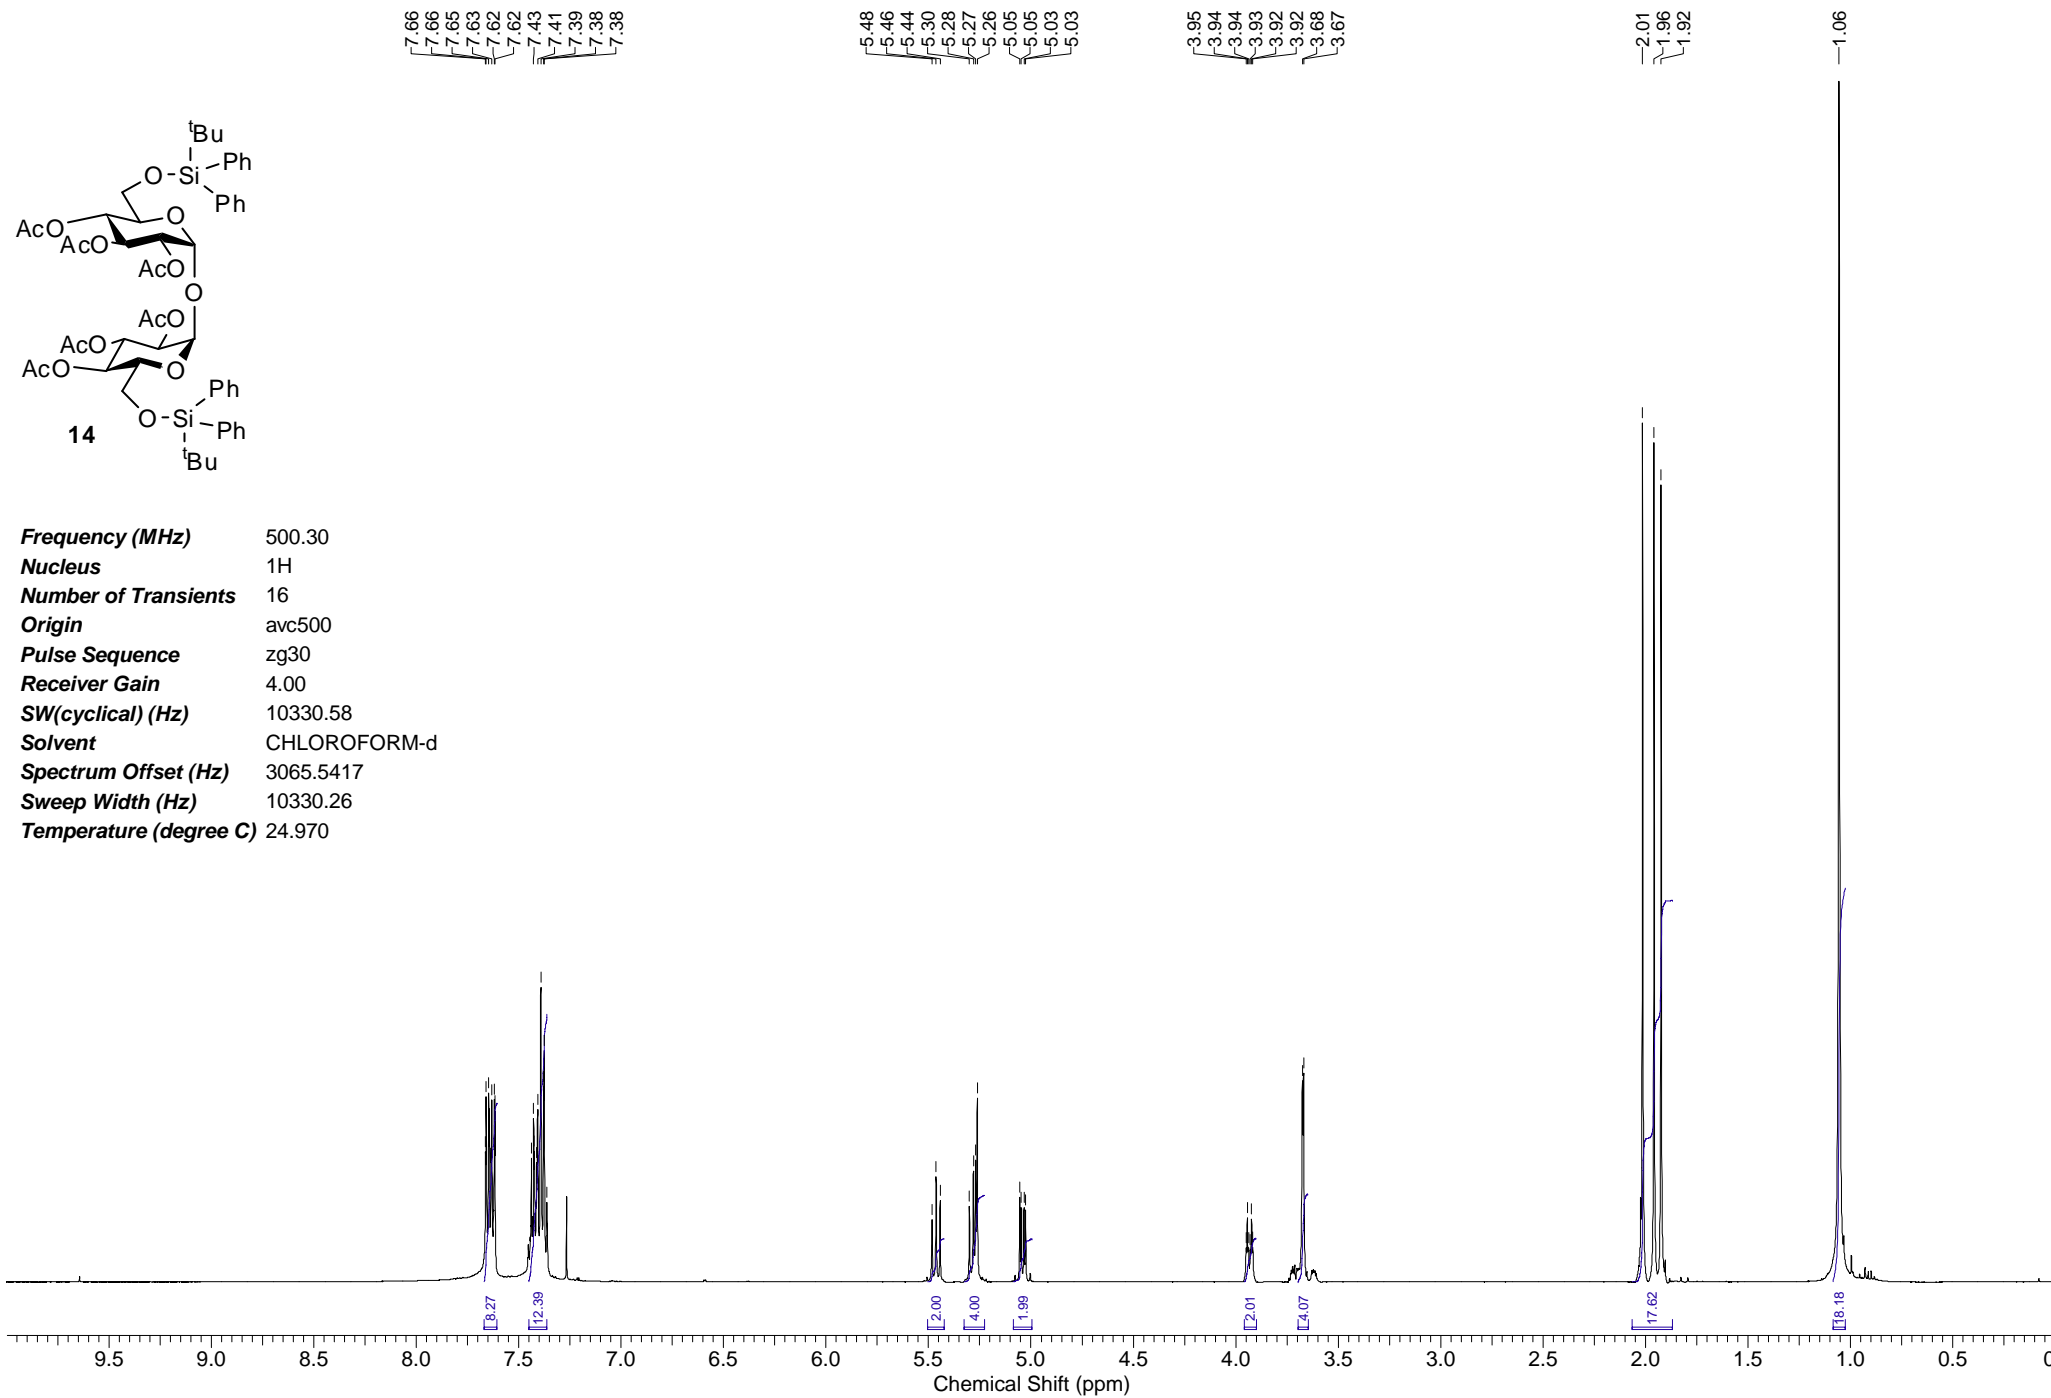

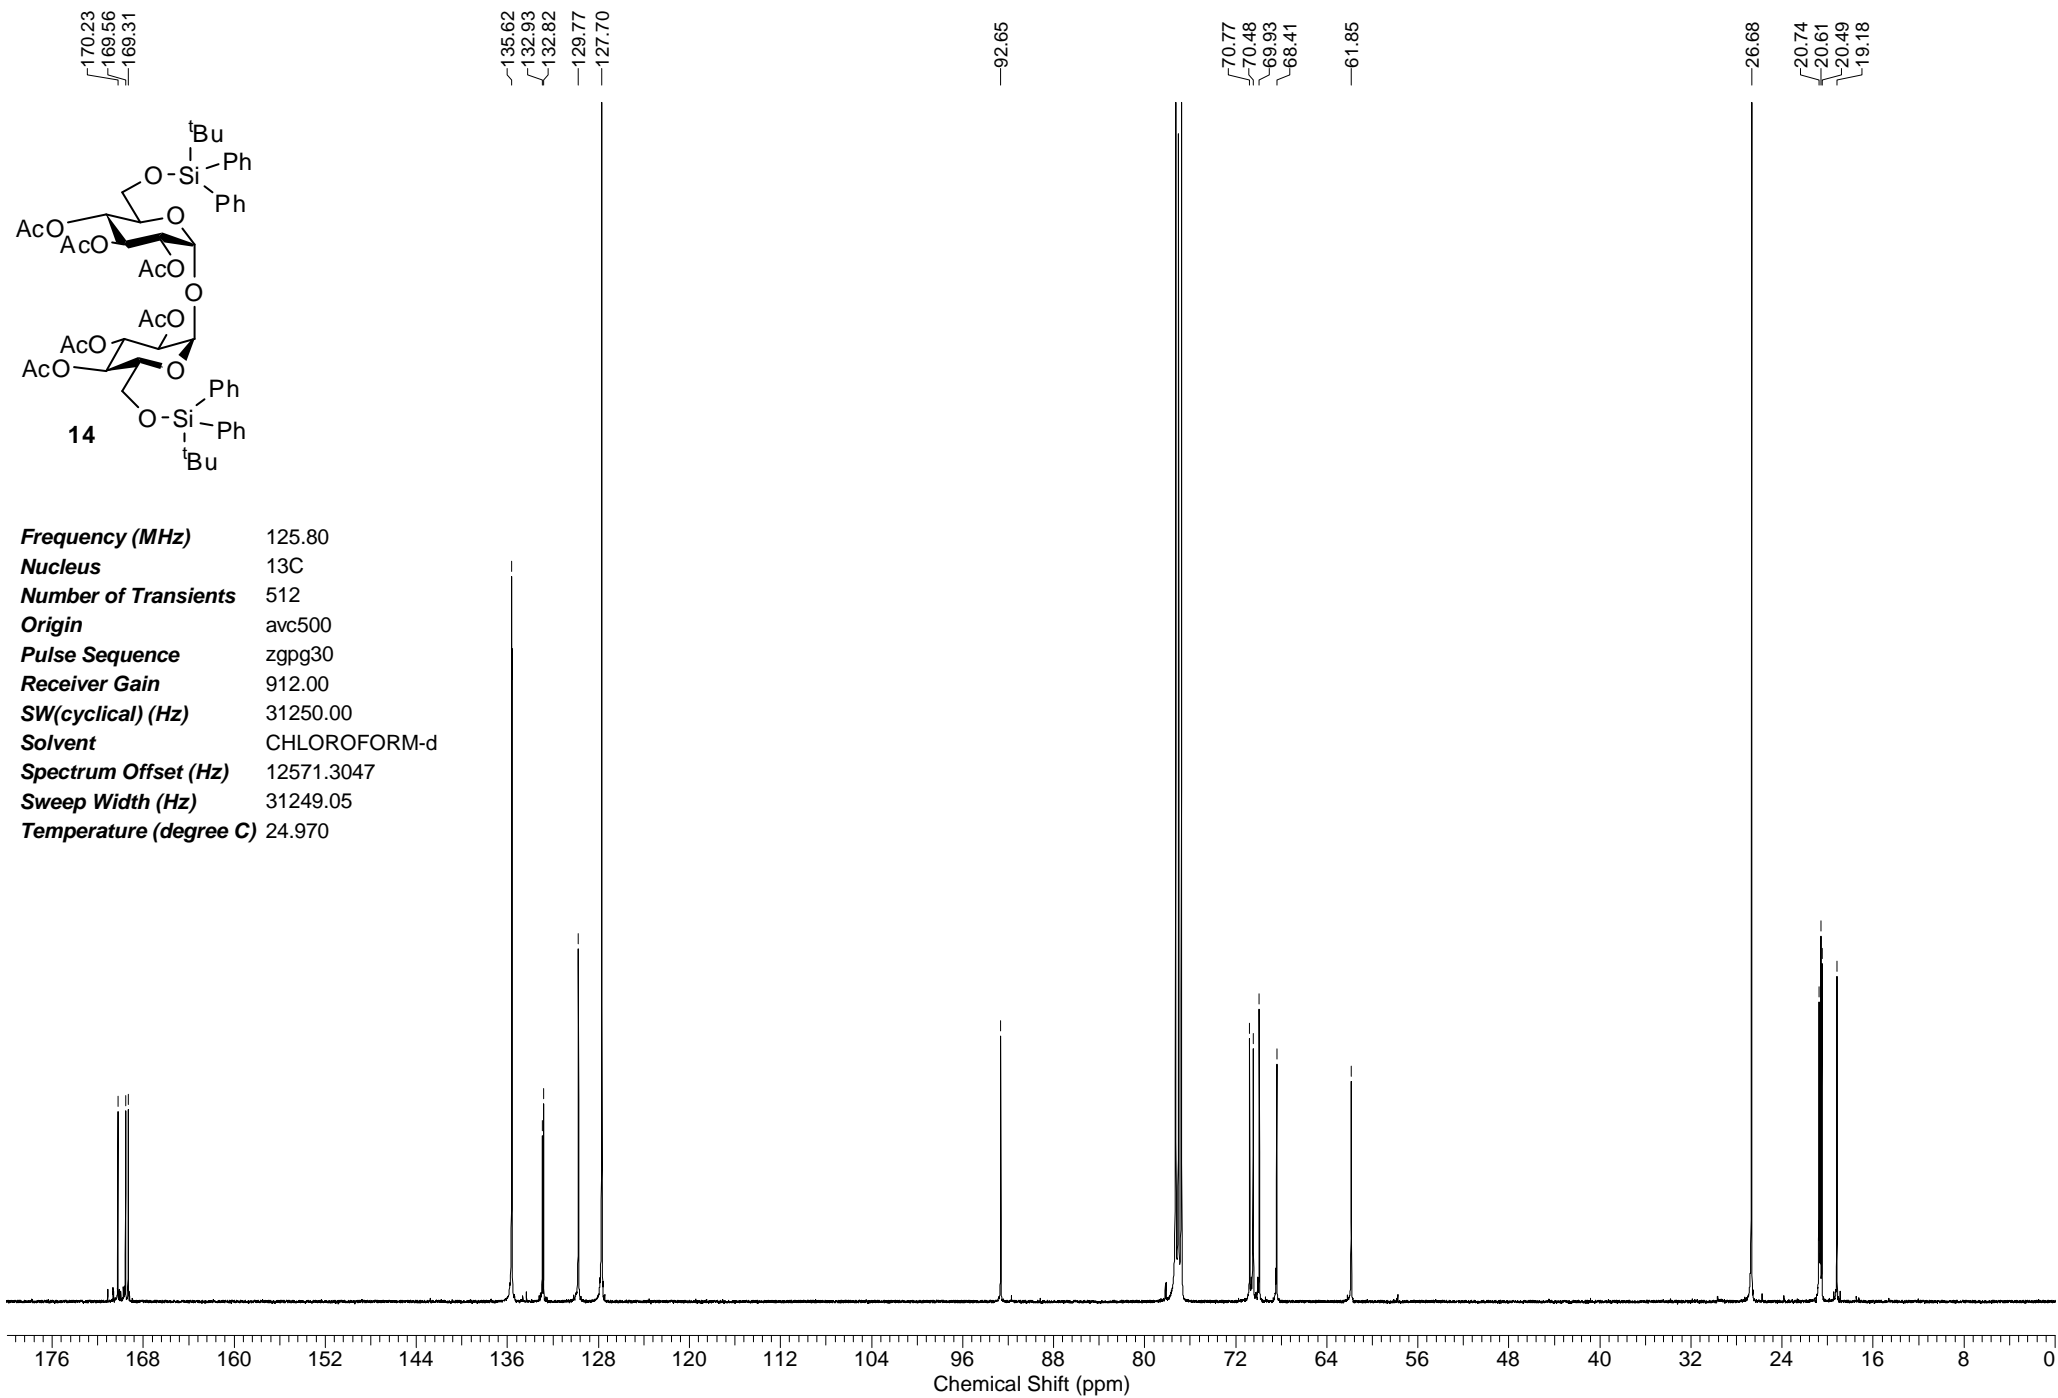

## 6. References

---

- (1) Vervoort, N. Daemen, D. Török, G. *J. Chromatogr. A.*, **2008**, *1189*, 92.
- (2) Viebel, *Biochem. Z.*, **1931**, *239*, 350
- (3) Fernández, J.M.G. Mellet, C.O. Blanco, J.L.J. Mota, J.F. Gabelle, A. Coste-Sarguet, A. Defaye J. *Carbohydr. Res.*, **2005**, *268*, 57.
- (4) Chittenden, G.J.F. *Carbohydr. Res.*, **1969**, *9*, 323.
